# Supplementary material
Source: MDPI journal article supplement (https://www.mdpi.com/2073-4352/14/2/135)
Supplement: s1 [file s1]

# Dinuclear Molybdenum(VI) Complexes Based on Flexible Succinyl and Adipoyl Dihydrazones

Edi Topić<sup>1</sup>, Vladimir Damjanović<sup>2</sup>, Katarina Pičuljan<sup>1</sup> and Mirta Rubčić<sup>1,\*</sup>

- 1 Department of Chemistry, Faculty of Science, University of Zagreb, Horvatovac 102a, 10000 Zagreb, Croatia; edi.topic@chem.pmf.hr (E.T.);  
kpiculjan@chem.pmf.hr (K.P.)
- 2 Department of Chemistry and Biochemistry, School of Medicine, University of Zagreb, Šalata 3, 10000 Zagreb, Croatia; vladimir.damjanovic@mef.hr
- \* Correspondence: mirta@chem.pmf.hr; Tel.: +385-1-4606-374

## Supporting Information

### Contents

|                               |    |
|-------------------------------|----|
| Reaction scheme.....          | 2  |
| Crystallographic data .....   | 3  |
| TGA Analysis.....             | 22 |
| Powder X-ray diffraction..... | 26 |
| NMR spectroscopy .....        | 30 |
| ATR FT-IR spectroscopy .....  | 45 |

## Reaction scheme

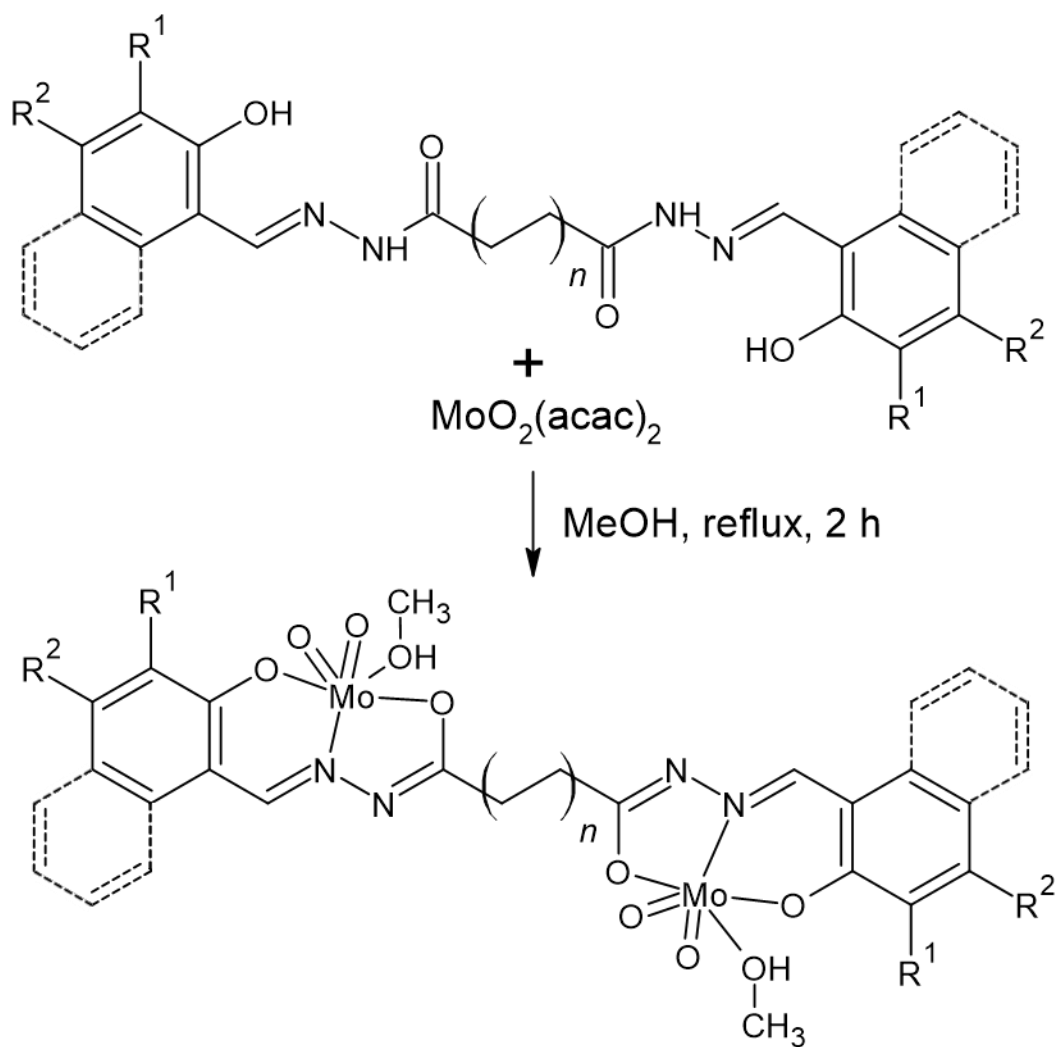

| Compound                                             | $\text{R}^1$ | $\text{R}^2$ | $n$ | Additional ring |
|------------------------------------------------------|--------------|--------------|-----|-----------------|
| $[\text{Mo}_2\text{O}_4(\text{MeOH})_2(\text{L}^1)]$ | H            | H            | 1   | /               |
| $[\text{Mo}_2\text{O}_4(\text{MeOH})_2(\text{L}^2)]$ | H            | H            | 1   | yes             |
| $[\text{Mo}_2\text{O}_4(\text{MeOH})_2(\text{L}^3)]$ | OH           | H            | 1   | /               |
| $[\text{Mo}_2\text{O}_4(\text{MeOH})_2(\text{L}^4)]$ | H            | OH           | 1   | /               |
| $[\text{Mo}_2\text{O}_4(\text{MeOH})_2(\text{L}^5)]$ | H            | H            | 2   | /               |
| $[\text{Mo}_2\text{O}_4(\text{MeOH})_2(\text{L}^6)]$ | H            | H            | 2   | yes             |
| $[\text{Mo}_2\text{O}_4(\text{MeOH})_2(\text{L}^7)]$ | OH           | H            | 2   | /               |
| $[\text{Mo}_2\text{O}_4(\text{MeOH})_2(\text{L}^8)]$ | H            | OH           | 2   | /               |

**Scheme S1.** Reaction scheme for synthesis of title compounds.

## Crystallographic data

**Table S1.** Experimental and crystallographic data for complexes derived from succinyl dihydrazide.

| Identifier                                                             | [Mo <sub>2</sub> O <sub>4</sub> (MeOH) <sub>2</sub> (L <sup>1</sup> )]·2MeOH   | [Mo <sub>2</sub> O <sub>4</sub> (H <sub>2</sub> O) <sub>2</sub> (L <sup>2</sup> )] | [Mo <sub>2</sub> O <sub>4</sub> (MeOH) <sub>2</sub> (L <sup>3</sup> )]·2MeOH   | [Mo <sub>2</sub> O <sub>4</sub> (MeOH) <sub>2</sub> (L <sup>4</sup> )]·2MeOH |
|------------------------------------------------------------------------|--------------------------------------------------------------------------------|------------------------------------------------------------------------------------|--------------------------------------------------------------------------------|------------------------------------------------------------------------------|
| Empirical formula                                                      | C <sub>22</sub> H <sub>30</sub> Mo <sub>2</sub> N <sub>4</sub> O <sub>12</sub> | C <sub>26</sub> H <sub>22</sub> Mo <sub>2</sub> N <sub>4</sub> O <sub>10</sub>     | C <sub>22</sub> H <sub>30</sub> Mo <sub>2</sub> N <sub>4</sub> O <sub>14</sub> | C <sub>11</sub> H <sub>15</sub> MoN <sub>2</sub> O <sub>7</sub>              |
| <i>M<sub>r</sub></i>                                                   | 734.38                                                                         | 742.35                                                                             | 766.38                                                                         | 383.19                                                                       |
| <i>T</i> /K                                                            | 169.98(10)                                                                     | 169.98(10)                                                                         | 293(2)                                                                         | 293(2)                                                                       |
| Crystal system                                                         | triclinic, yellow plate                                                        | monoclinic, yellow plate                                                           | triclinic, yellow plate                                                        | triclinic, yellow plate                                                      |
| Space group                                                            | <i>P</i> –1                                                                    | <i>P</i> 1 2 <sub>1</sub> /c 1                                                     | <i>P</i> –1                                                                    | <i>P</i> –1                                                                  |
| <i>a</i> /Å                                                            | 7.3669(3)                                                                      | 13.4533(9)                                                                         | 7.3641(9)                                                                      | 7.5929(8)                                                                    |
| <i>b</i> /Å                                                            | 9.4297(4)                                                                      | 8.2944(3)                                                                          | 9.4730(12)                                                                     | 9.6293(7)                                                                    |
| <i>c</i> /Å                                                            | 10.1440(3)                                                                     | 13.3864(9)                                                                         | 11.1993(13)                                                                    | 10.0959(7)                                                                   |
| <i>α</i> /°                                                            | 98.417(3)                                                                      | 90                                                                                 | 102.768(10)                                                                    | 96.570(6)                                                                    |
| <i>β</i> /°                                                            | 92.911(3)                                                                      | 116.282(8)                                                                         | 102.118(10)                                                                    | 92.887(7)                                                                    |
| <i>γ</i> /°                                                            | 98.726(4)                                                                      | 90                                                                                 | 98.750(10)                                                                     | 99.382(7)                                                                    |
| <i>V</i> /Å <sup>3</sup>                                               | 687.10(5)                                                                      | 1339.33(16)                                                                        | 728.64(16)                                                                     | 721.70(11)                                                                   |
| <i>Z</i>                                                               | 1                                                                              | 2                                                                                  | 1                                                                              | 2                                                                            |
| <i>ρ</i> <sub>calc</sub> /g cm <sup>–3</sup>                           | 1.775                                                                          | 1.841                                                                              | 1.747                                                                          | 1.763                                                                        |
| <i>μ</i> /mm <sup>–1</sup>                                             | 8.083                                                                          | 8.255                                                                              | 0.934                                                                          | 0.943                                                                        |
| <i>F</i> (000)                                                         | 370                                                                            | 740                                                                                | 386                                                                            | 386                                                                          |
| Crystal size/mm <sup>3</sup>                                           | 0.06×0.029×0.013                                                               | 0.151×0.028×0.011                                                                  | 0.171×0.116×0.034                                                              | 0.112×0.098×0.045                                                            |
| Radiation                                                              | CuKα (λ = 1.54184Å)                                                            | Cu Kα (λ = 1.54184Å)                                                               | MoKα (λ = 0.71073Å)                                                            | MoKα (λ = 0.71073Å)                                                          |
| 2Θ range/°                                                             | 8.836 to 160.336                                                               | 7.328 to 159.756                                                                   | 8.834 to 50.0                                                                  | 8.648 to 49.994                                                              |
| Index ranges                                                           | –9 ≤ <i>h</i> ≤ 9,<br>–12 ≤ <i>k</i> ≤ 12,<br>–12 ≤ <i>l</i> ≤ 12              | –17 ≤ <i>h</i> ≤ 16,<br>–10 ≤ <i>k</i> ≤ 8,<br>–17 ≤ <i>l</i> ≤ 14                 | –8 ≤ <i>h</i> ≤ 8,<br>–11 ≤ <i>k</i> ≤ 11,<br>–13 ≤ <i>l</i> ≤ 13              | –8 ≤ <i>h</i> ≤ 9,<br>–11 ≤ <i>k</i> ≤ 11,<br>–11 ≤ <i>l</i> ≤ 9             |
| Reflections collected                                                  | 20329                                                                          | 9827                                                                               | 5359                                                                           | 5244                                                                         |
| Independent reflections                                                | 2931 [ <i>R</i> <sub>int</sub> = 3.16%, <i>R</i> <sub>sigma</sub> = 5.66 %]    | 2842 [ <i>R</i> <sub>int</sub> = 6.35%, <i>R</i> <sub>sigma</sub> = 6.82 %]        | 2562 [ <i>R</i> <sub>int</sub> = 18.82%, <i>R</i> <sub>sigma</sub> = 11.3 %]   | 2528 [ <i>R</i> <sub>int</sub> = 8.4%, <i>R</i> <sub>sigma</sub> = 5.08 %]   |
| Data/restraints/parameters                                             | 2931/-/186                                                                     | 2842/-/195                                                                         | 2562/-/201                                                                     | 2528/-/201                                                                   |
| <i>g</i> <sub>1</sub> , <i>g</i> <sub>2</sub> in <i>w</i> <sup>a</sup> | 0.0403, 0.9484                                                                 | 0.0553, 13.2979                                                                    | 0.0029, 0                                                                      | 0.0381, 0                                                                    |
| Goodness-of-fit on <i>F</i> <sup>2</sup> , <i>S</i> <sup>b</sup>       | 1.168                                                                          | 1.047                                                                              | 0.920                                                                          | 1.023                                                                        |

|                                                     |                                  |                                   |                                   |                                  |
|-----------------------------------------------------|----------------------------------|-----------------------------------|-----------------------------------|----------------------------------|
| Final $R$ and $wR^c$ values [ $I \geq 2\sigma(I)$ ] | $R_1 = 3.15\%$ , $wR_2 = 8.35\%$ | $R_1 = 6.01\%$ , $wR_2 = 15.09\%$ | $R_1 = 6.49\%$ , $wR_2 = 7.77\%$  | $R_1 = 4.89\%$ , $wR_2 = 9.1\%$  |
| Final $R$ and $wR^c$ values [all data]              | $R_1 = 3.42\%$ , $wR_2 = 8.51\%$ | $R_1 = 7.91\%$ , $wR_2 = 16.02\%$ | $R_1 = 13.86\%$ , $wR_2 = 9.55\%$ | $R_1 = 7.32\%$ , $wR_2 = 9.93\%$ |
| Largest diff. peak/hole / $e \text{ \AA}^{-3}$      | 0.541/−0.742                     | 1.557/−1.618                      | 0.511/−0.723                      | 0.464/−0.482                     |

<sup>a</sup> $w = 1/[\sigma(F_o)^2 + (g_1P)^2 + g_2P]$  where  $P = (F_o^2 + 2F_c^2)/3$

<sup>b</sup> $S = \{\Sigma[w(F_o^2 - F_c^2)^2]/(N_r - N_p)\}^{1/2}$  where  $N_r$  = number of independent reflections,  $N_p$  = number of refined parameters.

<sup>c</sup> $R = \Sigma||F_o| - |F_c||/\Sigma|F_o|$ ;  $wR = \{\Sigma[w(F_o^2 - F_c^2)^2]/\Sigma[w(F_o^2)2]\}^{1/2}$

**Table S2.** Experimental and crystallographic data for complexes derived from adipoyl dihydrazide.

| Identifier                            | [Mo <sub>2</sub> O <sub>4</sub> (MeOH) <sub>2</sub> (L <sup>5</sup> )]         | [Mo <sub>2</sub> O <sub>4</sub> (MeOH) <sub>2</sub> (L <sup>6</sup> )]         | [Mo <sub>2</sub> O <sub>4</sub> (MeOH) <sub>2</sub> (L <sup>7</sup> )]         | [Mo <sub>2</sub> O <sub>4</sub> (MeOH) <sub>2</sub> (L <sup>8</sup> )]·2MeOH   |
|---------------------------------------|--------------------------------------------------------------------------------|--------------------------------------------------------------------------------|--------------------------------------------------------------------------------|--------------------------------------------------------------------------------|
| Empirical formula                     | C <sub>22</sub> H <sub>26</sub> Mo <sub>2</sub> N <sub>4</sub> O <sub>10</sub> | C <sub>30</sub> H <sub>30</sub> Mo <sub>2</sub> N <sub>4</sub> O <sub>10</sub> | C <sub>22</sub> H <sub>26</sub> Mo <sub>2</sub> N <sub>4</sub> O <sub>12</sub> | C <sub>24</sub> H <sub>34</sub> Mo <sub>2</sub> N <sub>4</sub> O <sub>14</sub> |
| $M_r$                                 | 698.35                                                                         | 798.46                                                                         | 730.35                                                                         | 794.43                                                                         |
| $T/K$                                 | 169.99(10)                                                                     | 169.98(10)                                                                     | 169.98(10)                                                                     | 169.98(10)                                                                     |
| Crystal system                        | triclinic, yellow block                                                        | monoclinic, yellow plate                                                       | monoclinic, yellow needle                                                      | monoclinic, yellow plate                                                       |
| Space group                           | $P - 1$                                                                        | $C 1 2/c 1$                                                                    | $C 1 2/c 1$                                                                    | $P 1 2_1/c 1$                                                                  |
| $a/\text{\AA}$                        | 7.0013(5)                                                                      | 16.287(3)                                                                      | 38.4604(9)                                                                     | 12.0854(4)                                                                     |
| $b/\text{\AA}$                        | 8.3133(6)                                                                      | 8.1699(10)                                                                     | 7.7091(2)                                                                      | 13.5826(3)                                                                     |
| $c/\text{\AA}$                        | 12.0124(7)                                                                     | 23.104(4)                                                                      | 8.9380(3)                                                                      | 10.1607(4)                                                                     |
| $\alpha/^\circ$                       | 80.805(5)                                                                      | 90                                                                             | 90                                                                             | 90                                                                             |
| $\beta/^\circ$                        | 87.832(5)                                                                      | 103.952(17)                                                                    | 90.412(3)                                                                      | 114.635(4)                                                                     |
| $\gamma/^\circ$                       | 68.817(7)                                                                      | 90                                                                             | 90                                                                             | 90                                                                             |
| $V/\text{\AA}^3$                      | 643.40(8)                                                                      | 2983.7(8)                                                                      | 2650.00(13)                                                                    | 1516.08(10)                                                                    |
| $Z$                                   | 1                                                                              | 4                                                                              | 4                                                                              | 2                                                                              |
| $\rho_{\text{calc}}/\text{g cm}^{-3}$ | 1.802                                                                          | 1.777                                                                          | 1.831                                                                          | 1.740                                                                          |
| $\mu/\text{mm}^{-1}$                  | 8.537                                                                          | 7.460                                                                          | 8.383                                                                          | 7.431                                                                          |
| $F(000)$                              | 350                                                                            | 1608                                                                           | 1464                                                                           | 804                                                                            |
| Crystal size/ $\text{mm}^3$           | 0.285×0.164×0.09                                                               | 0.03×0.015×0.006                                                               | 0.04×0.008×0.008                                                               | 0.2×0.1×0.1                                                                    |
| Radiation                             | CuK $\alpha$ ( $\lambda = 1.54184\text{\AA}$ )                                 |
| $2\theta$ range/ $^\circ$             | 7.456 to 160.598                                                               | 7.886 to 95.344                                                                | 9.198 to 159.43                                                                | 8.048 to 160.088                                                               |
| Index ranges                          | $-8 \leq h \leq 8$ ,<br>$-10 \leq k \leq 10$ ,<br>$-15 \leq l \leq 13$         | $-15 \leq h \leq 15$ ,<br>$-3 \leq k \leq 7$ ,<br>$-22 \leq l \leq 22$         | $-48 \leq h \leq 32$ ,<br>$-9 \leq k \leq 9$ ,<br>$-11 \leq l \leq 11$         | $-14 \leq h \leq 15$ ,<br>$-17 \leq k \leq 17$ ,<br>$-11 \leq l \leq 12$       |
| Reflections collected                 | 7726                                                                           | 4561                                                                           | 12114                                                                          | 11707                                                                          |
| Independent reflections               | 2713 [ $R_{\text{int}} = 5.57\%$ , $R_{\text{sigma}} = 6.76\%$ ]               | 1354 [ $R_{\text{int}} = 10.47\%$ , $R_{\text{sigma}} = 9.99\%$ ]              | 2779 [ $R_{\text{int}} = 5.32\%$ , $R_{\text{sigma}} = 6.03\%$ ]               | 3142 [ $R_{\text{int}} = 2.49\%$ , $R_{\text{sigma}} = 2.78\%$ ]               |
| Data/restraints/parameters            | 2713/-/177                                                                     | 1354/-/200                                                                     | 2779/-/188                                                                     | 3142/-/204                                                                     |

|                                                     |                                   |                                   |                                  |                                  |
|-----------------------------------------------------|-----------------------------------|-----------------------------------|----------------------------------|----------------------------------|
| $g_1, g_2$ in $w^a$                                 | 0.0863, 1.5578                    | 0.0841, 0                         | 0.0728, 14.2684                  | 0.0397, 2.5789                   |
| Goodness-of-fit on $F^2, S^b$                       | 1.077                             | 0.993                             | 1.076                            | 1.080                            |
| Final $R$ and $wR^c$ values [ $I \geq 2\sigma(I)$ ] | $R_1 = 4.82\%$ , $wR_2 = 13.48\%$ | $R_1 = 5.8\%$ , $wR_2 = 12.72\%$  | $R_1 = 4.8\%$ , $wR_2 = 12.86\%$ | $R_1 = 3.1\%$ , $wR_2 = 8.11\%$  |
| Final $R$ and $wR^c$ values [all data]              | $R_1 = 4.97\%$ , $wR_2 = 13.6\%$  | $R_1 = 9.33\%$ , $wR_2 = 14.39\%$ | $R_1 = 6.37\%$ , $wR_2 = 13.7\%$ | $R_1 = 3.52\%$ , $wR_2 = 8.31\%$ |
| Largest diff. peak/hole / e $\text{\AA}^{-3}$       | 1.666/−1.018                      | 1.066/−0.751                      | 1.453/−1.265                     | 0.550/−0.865                     |

<sup>a</sup> $w = 1/[\sigma F_o^2 + (g_1 P)^2 + g_2 P]$  where  $P = (F_o^2 + 2F_c^2)/3$

<sup>b</sup> $S = \{\Sigma[w(F_o^2 - F_c^2)2]/(N_r - N_p)\}^{1/2}$  where  $N_r$  = number of independent reflections,  $N_p$  = number of refined parameters.

<sup>c</sup> $R = \Sigma||F_o| - |F_c||/\Sigma|F_o|$ ;  $wR = \{\Sigma[w(F_o^2 - F_c^2)2]/\Sigma[w(F_o^2)2]\}^{1/2}$

**Table S3.** Selected bond lengths in the crystal structures of complexes derived from succinyl dihydrazide.

| <b>[Mo<sub>2</sub>O<sub>4</sub>(MeOH)<sub>2</sub>(L<sup>1</sup>)]·2MeOH</b>     |               |        |               |        |               |
|---------------------------------------------------------------------------------|---------------|--------|---------------|--------|---------------|
| Atoms                                                                           | Bond length/Å | Atoms  | Bond length/Å | Atoms  | Bond length/Å |
| C8–C9                                                                           | 1.501(4)      | Mo1–O4 | 1.704(3)      | O1–C2  | 1.349(3)      |
| Mo1–N1                                                                          | 2.250(2)      | Mo1–O5 | 2.299(2)      | O2–C8  | 1.306(4)      |
| Mo1–O1                                                                          | 1.9202(19)    | N1–C7  | 1.288(4)      | O5–C10 | 1.427(5)      |
| Mo1–O2                                                                          | 2.016(2)      | N1–N2  | 1.406(4)      |        |               |
| Mo1–O3                                                                          | 1.703(3)      | N2–C8  | 1.305(4)      |        |               |
| <b>[Mo<sub>2</sub>O<sub>4</sub>(H<sub>2</sub>O)<sub>2</sub>(L<sup>2</sup>)]</b> |               |        |               |        |               |
| Atoms                                                                           | Bond length/Å | Atoms  | Bond length/Å | Atoms  | Bond length/Å |
| C8–C9                                                                           | 1.485(11)     | Mo1–O4 | 1.713(6)      | O1–C2  | 1.352(10)     |
| Mo1–N1                                                                          | 2.209(6)      | Mo1–O5 | 2.321(7)      | O2–C8  | 1.318(9)      |
| Mo1–O1                                                                          | 1.908(6)      | N1–C7  | 1.283(10)     | O5–H5B | 0.86(15)      |
| Mo1–O2                                                                          | 2.022(6)      | N1–N2  | 1.396(10)     |        |               |
| Mo1–O3                                                                          | 1.694(7)      | N2–C8  | 1.303(10)     |        |               |
| <b>[Mo<sub>2</sub>O<sub>4</sub>(MeOH)<sub>2</sub>(L<sup>3</sup>)]·2MeOH</b>     |               |        |               |        |               |
| Atoms                                                                           | Bond length/Å | Atoms  | Bond length/Å | Atoms  | Bond length/Å |
| Mo1–N1                                                                          | 2.247(6)      | Mo1–O6 | 2.311(7)      | O2–H2  | 0.81(5)       |
| Mo1–O1                                                                          | 1.909(5)      | N1–C7  | 1.278(10)     | O3–C8  | 1.306(9)      |
| Mo1–O3                                                                          | 2.016(5)      | N1–N2  | 1.410(8)      |        |               |
| Mo1–O4                                                                          | 1.705(5)      | O1–C2  | 1.346(8)      |        |               |
| Mo1–O5                                                                          | 1.704(4)      | O2–C3  | 1.368(9)      |        |               |
| <b>[Mo<sub>2</sub>O<sub>4</sub>(MeOH)<sub>2</sub>(L<sup>4</sup>)]·2MeOH</b>     |               |        |               |        |               |
| Atoms                                                                           | Bond length/Å | Atoms  | Bond length/Å | Atoms  | Bond length/Å |
| C1–C7                                                                           | 1.435(7)      | Mo1–O5 | 1.712(3)      | O1–C2  | 1.343(6)      |
| Mo1–N1                                                                          | 2.229(4)      | Mo1–O6 | 2.316(5)      | O2–C4  | 1.343(6)      |
| Mo1–O1                                                                          | 1.914(4)      | N1–C7  | 1.280(6)      | O2–H2  | 0.80(5)       |
| Mo1–O3                                                                          | 2.006(3)      | N1–N2  | 1.414(6)      | O3–C8  | 1.313(6)      |
| Mo1–O4                                                                          | 1.688(4)      | N2–C8  | 1.300(7)      |        |               |

**Table S4.** Selected bond lengths in the crystal structures of complexes derived from adipoyl dihydrazide.

| <b>[Mo<sub>2</sub>O<sub>4</sub>(MeOH)<sub>2</sub>(L<sup>5</sup>)]</b>       |               |        |               |         |               |
|-----------------------------------------------------------------------------|---------------|--------|---------------|---------|---------------|
| Atoms                                                                       | Bond length/Å | Atoms  | Bond length/Å | Atoms   | Bond length/Å |
| C8–C9                                                                       | 1.494(7)      | Mo1–O4 | 1.720(4)      | O1–C2   | 1.350(6)      |
| Mo1–N1                                                                      | 2.226(4)      | Mo1–O5 | 2.375(4)      | O2–C8   | 1.327(6)      |
| Mo1–O1                                                                      | 1.926(3)      | N1–C7  | 1.279(7)      | O5–C11  | 1.414(8)      |
| Mo1–O2                                                                      | 1.989(3)      | N1–N2  | 1.410(6)      | O5–H5   | 0.88(3)       |
| Mo1–O3                                                                      | 1.692(4)      | N2–C8  | 1.303(6)      |         |               |
| <b>[Mo<sub>2</sub>O<sub>4</sub>(MeOH)<sub>2</sub>(L<sup>6</sup>)]</b>       |               |        |               |         |               |
| Atoms                                                                       | Bond length/Å | Atoms  | Bond length/Å | Atoms   | Bond length/Å |
| C8–C9                                                                       | 1.512(18)     | Mo1–O4 | 1.724(8)      | O1–C2   | 1.350(16)     |
| Mo1–N1                                                                      | 2.232(10)     | Mo1–O5 | 2.301(9)      | O2–C8   | 1.284(14)     |
| Mo1–O1                                                                      | 1.951(8)      | N1–C7  | 1.289(16)     | O5–C15  | 1.445(16)     |
| Mo1–O2                                                                      | 2.016(9)      | N1–N2  | 1.408(14)     | O5–H005 | 0.88(5)       |
| Mo1–O3                                                                      | 1.647(9)      | N2–C8  | 1.314(16)     |         |               |
| <b>[Mo<sub>2</sub>O<sub>4</sub>(MeOH)<sub>2</sub>(L<sup>7</sup>)]</b>       |               |        |               |         |               |
| Atoms                                                                       | Bond length/Å | Atoms  | Bond length/Å | Atoms   | Bond length/Å |
| Mo1–N1                                                                      | 2.262(5)      | Mo1–O5 | 2.340(4)      | O5–C11  | 1.406(8)      |
| Mo1–O1                                                                      | 1.920(4)      | N1–C7  | 1.282(7)      | O5–H5   | 0.82(6)       |
| Mo1–O2                                                                      | 2.010(4)      | N1–N2  | 1.407(6)      |         |               |
| Mo1–O3                                                                      | 1.695(4)      | O1–C2  | 1.335(7)      |         |               |
| <b>[Mo<sub>2</sub>O<sub>4</sub>(MeOH)<sub>2</sub>(L<sup>8</sup>)]·2MeOH</b> |               |        |               |         |               |
| Atoms                                                                       | Bond length/Å | Atoms  | Bond length/Å | Atoms   | Bond length/Å |
| C1–C7                                                                       | 1.435(5)      | Mo1–O5 | 1.723(2)      | O1–C2   | 1.351(4)      |
| Mo1–N1                                                                      | 2.238(3)      | Mo1–O6 | 2.320(2)      | O2–C8   | 1.317(4)      |
| Mo1–O1                                                                      | 1.925(2)      | N1–C7  | 1.293(4)      | O3–C4   | 1.352(5)      |
| Mo1–O2                                                                      | 1.985(3)      | N1–N2  | 1.412(4)      |         |               |
| Mo1–O4                                                                      | 1.694(3)      | N2–C8  | 1.300(4)      |         |               |

**Table S5.** Selected bond angles in the crystal structures of complexes derived from succinyl dihydrazide.

| <b>[Mo<sub>2</sub>O<sub>4</sub>(MeOH)<sub>2</sub>(L<sup>1</sup>)]·2MeOH</b>     |              |           |              |            |              |
|---------------------------------------------------------------------------------|--------------|-----------|--------------|------------|--------------|
| Atoms                                                                           | Bond angle/° | Atoms     | Bond angle/° | Atoms      | Bond angle/° |
| C2–C1–C7                                                                        | 123.6(3)     | O1–Mo1–O4 | 103.42(11)   | O5–Mo1–N1  | 75.65(9)     |
| C6–C1–C7                                                                        | 117.8(3)     | O1–Mo1–O5 | 80.96(10)    | Mo1–N1–C7  | 128.1(2)     |
| O1–C2–C1                                                                        | 122.7(3)     | O2–Mo1–N1 | 71.49(9)     | Mo1–N1–N2  | 115.2(2)     |
| O1–C2–C3                                                                        | 117.4(3)     | O2–Mo1–O3 | 96.16(12)    | N2–N1–C7   | 116.6(2)     |
| N1–C7–C1                                                                        | 123.4(3)     | O2–Mo1–O4 | 96.97(11)    | N1–N2–C8   | 109.1(3)     |
| N2–C8–C9                                                                        | 120.0(3)     | O2–Mo1–O5 | 78.82(10)    | Mo1–O1–C2  | 135.78(18)   |
| O2–C8–C9                                                                        | 116.4(2)     | O3–Mo1–N1 | 93.30(12)    | Mo1–O2–C8  | 120.49(17)   |
| O2–C8–N2                                                                        | 123.6(3)     | O3–Mo1–O4 | 105.51(14)   | Mo1–O5–C10 | 125.0(2)     |
| O1–Mo1–N1                                                                       | 81.94(9)     | O3–Mo1–O5 | 168.81(13)   |            |              |
| O1–Mo1–O2                                                                       | 149.81(9)    | O4–Mo1–N1 | 159.07(12)   |            |              |
| O1–Mo1–O3                                                                       | 99.50(12)    | O4–Mo1–O5 | 85.14(12)    |            |              |
| <b>[Mo<sub>2</sub>O<sub>4</sub>(H<sub>2</sub>O)<sub>2</sub>(L<sup>2</sup>)]</b> |              |           |              |            |              |
| Atoms                                                                           | Bond angle/° | Atoms     | Bond angle/° | Atoms      | Bond angle/° |
| C2–C1–C7                                                                        | 120.8(7)     | O1–Mo1–O3 | 97.9(3)      | O4–Mo1–O5  | 83.4(3)      |
| C6–C1–C7                                                                        | 120.5(7)     | O1–Mo1–O4 | 104.6(3)     | O5–Mo1–N1  | 75.5(2)      |
| O1–C2–C1                                                                        | 123.0(7)     | O1–Mo1–O5 | 79.5(3)      | Mo1–N1–C7  | 129.0(6)     |
| O1–C2–C3                                                                        | 116.2(7)     | O2–Mo1–N1 | 71.8(2)      | Mo1–N1–N2  | 115.9(5)     |
| N1–C7–C1                                                                        | 123.9(7)     | O2–Mo1–O3 | 97.8(3)      | N2–N1–C7   | 115.2(6)     |
| N2–C8–C9                                                                        | 120.3(7)     | O2–Mo1–O4 | 95.9(3)      | N1–N2–C8   | 110.3(6)     |
| O2–C8–C9                                                                        | 118.0(7)     | O2–Mo1–O5 | 80.9(2)      | Mo1–O1–C2  | 134.4(5)     |
| O2–C8–N2                                                                        | 121.7(7)     | O3–Mo1–N1 | 95.5(3)      | Mo1–O2–C8  | 120.2(5)     |
| C8–C9–C9_a                                                                      | 111.6(6)     | O3–Mo1–O4 | 105.8(3)     | Mo1–O5–H5B | 115(11)      |
| O1–Mo1–N1                                                                       | 80.9(2)      | O3–Mo1–O5 | 170.9(2)     |            |              |
| O1–Mo1–O2                                                                       | 149.7(2)     | O4–Mo1–N1 | 156.9(3)     |            |              |
| <b>[Mo<sub>2</sub>O<sub>4</sub>(MeOH)<sub>2</sub>(L<sup>3</sup>)]·2MeOH</b>     |              |           |              |            |              |
| Atoms                                                                           | Bond angle/° | Atoms     | Bond angle/° | Atoms      | Bond angle/° |
| C2–C1–C7                                                                        | 121.5(7)     | O1–Mo1–O3 | 149.1(2)     | O5–Mo1–O6  | 85.2(2)      |
| C6–C1–C7                                                                        | 120.2(6)     | O1–Mo1–O4 | 99.4(2)      | O6–Mo1–N1  | 76.6(2)      |
| O1–C2–C1                                                                        | 123.4(6)     | O1–Mo1–O5 | 105.2(2)     | Mo1–N1–C7  | 126.8(5)     |
| O1–C2–C3                                                                        | 117.2(6)     | O1–Mo1–O6 | 80.3(2)      | Mo1–N1–N2  | 115.5(4)     |
| O2–C3–C2                                                                        | 120.7(7)     | O3–Mo1–N1 | 71.5(2)      | N2–N1–C7   | 117.6(6)     |
| O2–C3–C4                                                                        | 118.4(7)     | O3–Mo1–O4 | 96.9(2)      | N1–N2–C8   | 108.8(5)     |
| N1–C7–C1                                                                        | 125.3(6)     | O3–Mo1–O5 | 95.4(2)      | Mo1–O1–C2  | 134.9(4)     |
| N2–C8–C9                                                                        | 120.5(6)     | O3–Mo1–O6 | 78.7(2)      | C3–O2–H2   | 102(7)       |
| O3–C8–C9                                                                        | 116.0(6)     | O4–Mo1–N1 | 92.2(2)      | Mo1–O3–C8  | 120.7(5)     |
| O3–C8–N2                                                                        | 123.5(7)     | O4–Mo1–O5 | 105.7(2)     | Mo1–O6–C10 | 125.7(5)     |
| C8–C9–C9_a                                                                      | 113.2(6)     | O4–Mo1–O6 | 168.7(2)     | Mo1–O6–H6  | 123(6)       |
| O1–Mo1–N1                                                                       | 81.8(2)      | O5–Mo1–N1 | 159.1(2)     |            |              |
| <b>[Mo<sub>2</sub>O<sub>4</sub>(MeOH)<sub>2</sub>(L<sup>4</sup>)]·2MeOH</b>     |              |           |              |            |              |



| Atoms      | Bond angle/° | Atoms     | Bond angle/° | Atoms      | Bond angle/° |
|------------|--------------|-----------|--------------|------------|--------------|
| C2–C1–C7   | 122.6(4)     | O1–Mo1–O3 | 150.37(15)   | O5–Mo1–O6  | 83.71(16)    |
| C6–C1–C7   | 120.2(5)     | O1–Mo1–O4 | 98.73(17)    | O6–Mo1–N1  | 75.42(15)    |
| O1–C2–C1   | 121.8(4)     | O1–Mo1–O5 | 102.26(15)   | Mo1–N1–C7  | 128.1(3)     |
| O1–C2–C3   | 118.0(4)     | O1–Mo1–O6 | 80.01(15)    | Mo1–N1–N2  | 115.5(3)     |
| O2–C4–C3   | 123.2(5)     | O3–Mo1–N1 | 71.85(13)    | N2–N1–C7   | 116.5(4)     |
| O2–C4–C5   | 117.0(4)     | O3–Mo1–O4 | 96.91(17)    | N1–N2–C8   | 108.9(4)     |
| N1–C7–C1   | 124.7(5)     | O3–Mo1–O5 | 97.30(15)    | Mo1–O1–C2  | 136.3(3)     |
| N2–C8–C9   | 120.7(4)     | O3–Mo1–O6 | 80.27(15)    | C4–O2–H2   | 112(5)       |
| O3–C8–C9   | 116.0(5)     | O4–Mo1–N1 | 94.65(18)    | Mo1–O3–C8  | 120.4(3)     |
| O3–C8–N2   | 123.4(5)     | O4–Mo1–O5 | 106.15(19)   | Mo1–O6–C10 | 126.1(4)     |
| C8–C9–C9_a | 113.3(4)     | O4–Mo1–O6 | 170.07(17)   | Mo1–O6–H6  | 111(5)       |
| O1–Mo1–N1  | 81.91(14)    | O5–Mo1–N1 | 157.73(18)   |            |              |

**Table S6.** Selected bond angles in the crystal structures of complexes derived from adipoyl dihydrazide.

| [Mo <sub>2</sub> O <sub>4</sub> (MeOH) <sub>2</sub> (L <sup>5</sup> )] |              |           |              |            |              |
|------------------------------------------------------------------------|--------------|-----------|--------------|------------|--------------|
| Atoms                                                                  | Bond angle/° | Atoms     | Bond angle/° | Atoms      | Bond angle/° |
| C2–C1–C7                                                               | 123.2(5)     | O1–Mo1–O4 | 103.19(17)   | O5–Mo1–N1  | 75.74(14)    |
| C6–C1–C7                                                               | 118.5(4)     | O1–Mo1–O5 | 79.51(14)    | Mo1–N1–C7  | 128.9(3)     |
| O1–C2–C1                                                               | 121.8(4)     | O2–Mo1–N1 | 72.13(15)    | Mo1–N1–N2  | 115.5(3)     |
| O1–C2–C3                                                               | 117.4(5)     | O2–Mo1–O3 | 98.52(17)    | N2–N1–C7   | 115.5(4)     |
| N1–C7–C1                                                               | 123.2(5)     | O2–Mo1–O4 | 95.63(17)    | N1–N2–C8   | 108.8(4)     |
| N2–C8–C9                                                               | 120.4(5)     | O2–Mo1–O5 | 77.56(14)    | Mo1–O1–C2  | 135.0(3)     |
| O2–C8–C9                                                               | 116.7(4)     | O3–Mo1–N1 | 94.33(18)    | Mo1–O2–C8  | 120.2(3)     |
| O2–C8–N2                                                               | 123.0(4)     | O3–Mo1–O4 | 105.78(19)   | C11–O5–H5  | 107(3)       |
| O1–Mo1–N1                                                              | 81.43(15)    | O3–Mo1–O5 | 170.00(18)   | Mo1–O5–C11 | 127.3(4)     |
| O1–Mo1–O2                                                              | 148.44(15)   | O4–Mo1–N1 | 157.98(15)   | Mo1–O5–H5  | 122(2)       |
| O1–Mo1–O3                                                              | 100.38(17)   | O4–Mo1–O5 | 83.88(16)    |            |              |
| [Mo <sub>2</sub> O <sub>4</sub> (MeOH) <sub>2</sub> (L <sup>6</sup> )] |              |           |              |            |              |
| Atoms                                                                  | Bond angle/° | Atoms     | Bond angle/° | Atoms      | Bond angle/° |
| C2–C1–C7                                                               | 124.4(12)    | O1–Mo1–O4 | 103.8(4)     | Mo1–N1–C7  | 128.8(8)     |
| C6–C1–C7                                                               | 117.3(12)    | O1–Mo1–O5 | 80.2(3)      | Mo1–N1–N2  | 115.3(7)     |
| O1–C2–C1                                                               | 121.9(12)    | O2–Mo1–N1 | 71.6(3)      | N2–N1–C7   | 115.9(10)    |
| O1–C2–C3                                                               | 116.1(11)    | O2–Mo1–O3 | 99.8(4)      | N1–N2–C8   | 108.2(9)     |
| N1–C7–C1                                                               | 120.7(11)    | O2–Mo1–O4 | 97.0(4)      | Mo1–O1–C2  | 130.5(8)     |
| N2–C8–C9                                                               | 119.2(11)    | O2–Mo1–O5 | 79.2(3)      | Mo1–O2–C8  | 120.1(8)     |
| O2–C8–C9                                                               | 116.6(11)    | O3–Mo1–N1 | 96.1(4)      | C15–O5–H5  | 108(4)       |
| O2–C8–N2                                                               | 124.2(12)    | O3–Mo1–O4 | 106.3(4)     | Mo1–O5–C15 | 129.5(7)     |
| C8–C9–C10                                                              | 113.0(11)    | O3–Mo1–O5 | 171.8(3)     | Mo1–O5–H5  | 121(4)       |
| O1–Mo1–N1                                                              | 80.0(4)      | O4–Mo1–N1 | 156.5(4)     |            |              |

|                                                                             |              |           |              |            |              |
|-----------------------------------------------------------------------------|--------------|-----------|--------------|------------|--------------|
| O1–Mo1–O2                                                                   | 148.1(3)     | O4–Mo1–O5 | 81.8(4)      |            |              |
| O1–Mo1–O3                                                                   | 97.2(4)      | O5–Mo1–N1 | 75.9(3)      |            |              |
| <b>[Mo<sub>2</sub>O<sub>4</sub>(MeOH)<sub>2</sub>(L<sup>7</sup>)]</b>       |              |           |              |            |              |
| Atoms                                                                       | Bond angle/° | Atoms     | Bond angle/° | Atoms      | Bond angle/° |
| C2–C1–C7                                                                    | 122.0(5)     | O1–Mo1–O4 | 105.44(19)   | Mo1–N1–C7  | 129.1(4)     |
| C6–C1–C7                                                                    | 119.2(5)     | O1–Mo1–O5 | 77.73(17)    | Mo1–N1–N2  | 114.1(3)     |
| O1–C2–C1                                                                    | 123.7(5)     | O2–Mo1–N1 | 71.83(16)    | N2–N1–C7   | 116.8(5)     |
| O1–C2–C3                                                                    | 116.6(5)     | O2–Mo1–O3 | 99.24(18)    | N1–N2–C8   | 109.8(4)     |
| N1–C7–C1                                                                    | 123.5(5)     | O2–Mo1–O4 | 94.81(18)    | Mo1–O1–C2  | 135.0(4)     |
| N2–C8–C9                                                                    | 121.1(5)     | O2–Mo1–O5 | 79.64(15)    | Mo1–O2–C8  | 119.7(3)     |
| O2–C8–C9                                                                    | 115.9(5)     | O3–Mo1–N1 | 93.30(17)    | C11–O5–H5  | 106(5)       |
| O2–C8–N2                                                                    | 123.0(5)     | O3–Mo1–O4 | 105.5(2)     | Mo1–O5–C11 | 128.8(4)     |
| C8–C9–C10                                                                   | 112.7(4)     | O3–Mo1–O5 | 170.17(17)   | Mo1–O5–H5  | 125(5)       |
| O1–Mo1–N1                                                                   | 80.89(16)    | O4–Mo1–N1 | 158.68(18)   |            |              |
| O1–Mo1–O2                                                                   | 147.76(16)   | O4–Mo1–O5 | 84.37(18)    |            |              |
| O1–Mo1–O3                                                                   | 99.2(2)      | O5–Mo1–N1 | 77.03(16)    |            |              |
| <b>[Mo<sub>2</sub>O<sub>4</sub>(MeOH)<sub>2</sub>(L<sup>8</sup>)]·2MeOH</b> |              |           |              |            |              |
| Atoms                                                                       | Bond angle/° | Atoms     | Bond angle/° | Atoms      | Bond angle/° |
| C2–C1–C7                                                                    | 123.8(3)     | O1–Mo1–O2 | 148.33(9)    | O5–Mo1–O6  | 86.20(11)    |
| C6–C1–C7                                                                    | 119.0(3)     | O1–Mo1–O4 | 97.99(11)    | O6–Mo1–N1  | 76.82(9)     |
| O1–C2–C1                                                                    | 122.0(3)     | O1–Mo1–O5 | 105.21(10)   | Mo1–N1–C7  | 127.3(2)     |
| O1–C2–C3                                                                    | 116.9(3)     | O1–Mo1–O6 | 77.13(10)    | Mo1–N1–N2  | 115.35(19)   |
| O3–C4–C3                                                                    | 122.0(3)     | O2–Mo1–N1 | 71.56(9)     | N2–N1–C7   | 117.2(3)     |
| O3–C4–C5                                                                    | 118.0(3)     | O2–Mo1–O4 | 99.57(11)    | N1–N2–C8   | 108.8(3)     |
| N1–C7–C1                                                                    | 122.9(3)     | O2–Mo1–O5 | 95.21(10)    | Mo1–O1–C2  | 131.42(18)   |
| N2–C8–C9                                                                    | 124.1(3)     | O2–Mo1–O6 | 80.42(9)     | Mo1–O2–C8  | 121.5(2)     |
| O2–C8–C9                                                                    | 113.2(3)     | O4–Mo1–N1 | 91.95(11)    | Mo1–O6–C11 | 129.4(2)     |
| O2–C8–N2                                                                    | 122.7(3)     | O4–Mo1–O5 | 105.48(12)   |            |              |
| C8–C9–C10                                                                   | 116.6(3)     | O4–Mo1–O6 | 168.23(11)   |            |              |
| O1–Mo1–N1                                                                   | 81.72(9)     | O5–Mo1–N1 | 159.86(11)   |            |              |

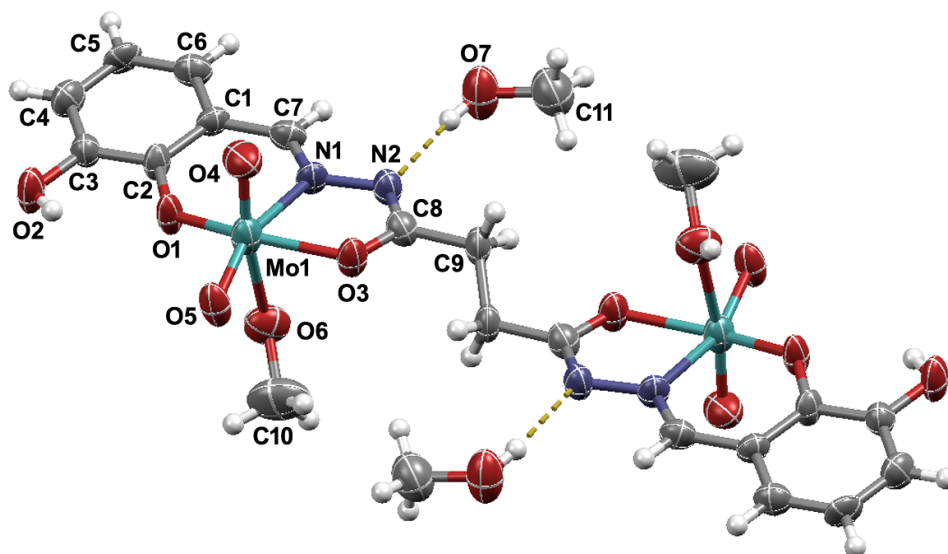

(a)

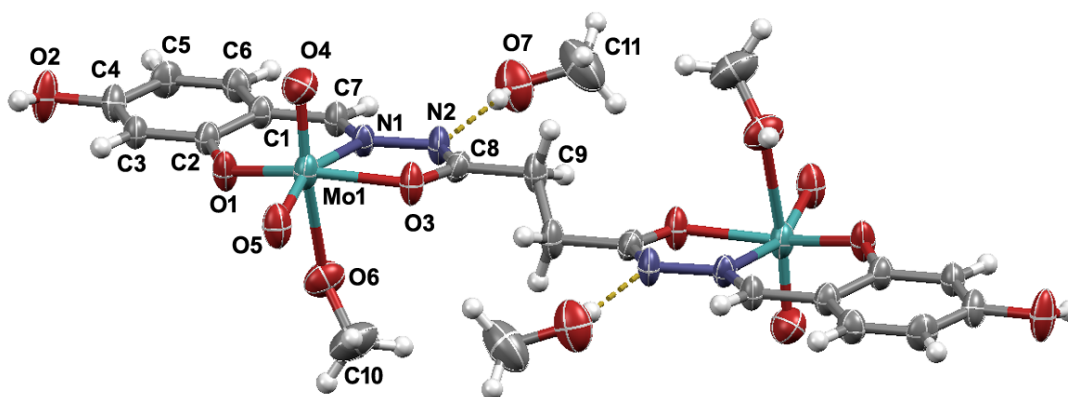

(b)

**Figure S1.** Molecular structures of: (a)  $[\text{Mo}_2\text{O}_4(\text{MeOH})_2(\text{L}^3)] \cdot 2\text{MeOH}$  and (b)  $[\text{Mo}_2\text{O}_4(\text{MeOH})_2(\text{L}^4)] \cdot 2\text{MeOH}$  with the atom numbering schemes. The central aliphatic C2 fragments of molecules lie on the inversion center. In (a) and (b) displacement ellipsoids are drawn at the 50% probability level, while the hydrogen atoms are presented as spheres of arbitrary small radii. Hydrogen bonds are highlighted by yellow dashed lines.

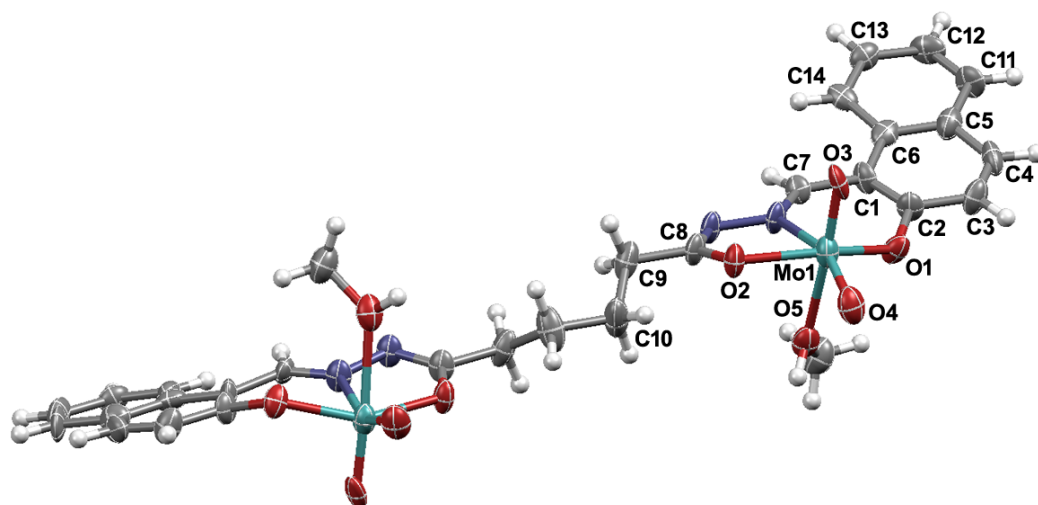

(a)

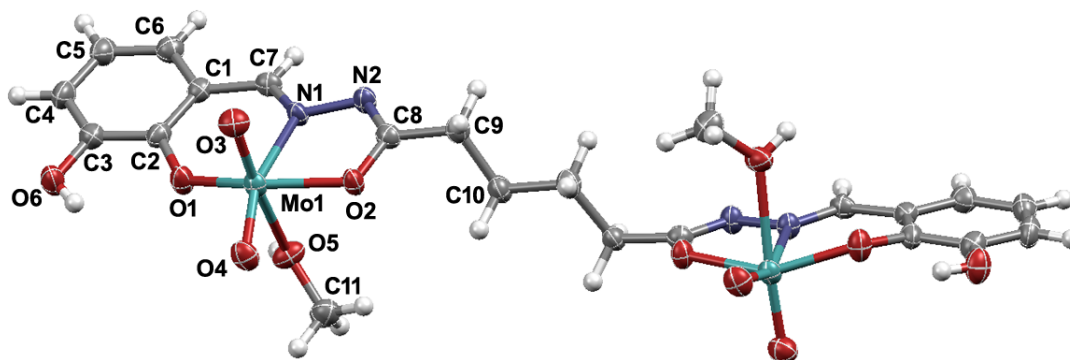

(b)

**Figure S2.** Molecular structures of: (a)  $[\text{Mo}_2\text{O}_4(\text{MeOH})_2(\text{L}^6)]$  and (b)  $[\text{Mo}_2\text{O}_4(\text{MeOH})_2(\text{L}^7)] \cdot 2\text{MeOH}$  with the atom numbering schemes. The central aliphatic C2 fragments of molecules lie on the inversion center. In (a) and (b) displacement ellipsoids are drawn at the 50% probability level, while the hydrogen atoms are presented as spheres of arbitrary small radii. Hydrogen bonds are highlighted by yellow dashed lines.

**Table S7.** Hydrogen bond parameters in the crystal structures of prepared complexes.

| D–H...A                                                                         | D–H      | H...A    | D...A     | $\angle$ D–H...A | Symmetry code          |
|---------------------------------------------------------------------------------|----------|----------|-----------|------------------|------------------------|
| <b>[Mo<sub>2</sub>O<sub>4</sub>(MeOH)<sub>2</sub>(L<sup>1</sup>)]·2MeOH</b>     |          |          |           |                  |                        |
| O5–H5...O6                                                                      | 0.84     | 1.83     | 2.670(4)  | 172              | $x, y, z$              |
| O6–H6A...N2                                                                     | 0.84     | 2.04     | 2.882(4)  | 179              | $1-x, 1-y, 1-z$        |
| C6–H6...O3                                                                      | 0.95     | 2.56     | 3.244(4)  | 129              | $2-x, 1-y, 1-z$        |
| C10–H10B...O3                                                                   | 0.98     | 2.47     | 3.314(5)  | 144              | $-1+x, y, z$           |
| <b>[Mo<sub>2</sub>O<sub>4</sub>(H<sub>2</sub>O)<sub>2</sub>(L<sup>2</sup>)]</b> |          |          |           |                  |                        |
| O5–H5A...N2                                                                     | 0.87     | 1.89     | 2.754(9)  | 172              | $1-x, -1/2+y, 3/2-z$   |
| O5–H5B...O4                                                                     | 0.86(15) | 1.99(15) | 2.822(9)  | 163(12)          | $1-x, 1/2+y, 3/2-z$    |
| C3–H3...O3                                                                      | 0.95     | 2.51     | 3.310(10) | 142              | $x, 1/2-y, 1/2+z$      |
| C9–H9B...O4                                                                     | 0.99     | 2.49     | 3.378(9)  | 149              | $x, 1/2-y, -1/2+z$     |
| <b>[Mo<sub>2</sub>O<sub>4</sub>(MeOH)<sub>2</sub>(L<sup>3</sup>)]·2MeOH</b>     |          |          |           |                  |                        |
| O6–H6...O7                                                                      | 0.82(8)  | 1.87(7)  | 2.680(9)  | 172(7)           | $x, y, z$              |
| O7–H7A...N2                                                                     | 0.81(4)  | 2.16(6)  | 2.941(8)  | 162(9)           | $2-x, 1-y, 1-z$        |
| C10–H10B...O4                                                                   | 0.96     | 2.35     | 3.251(11) | 156              | $1+x, y, z$            |
| <b>[Mo<sub>2</sub>O<sub>4</sub>(MeOH)<sub>2</sub>(L<sup>4</sup>)]·2MeOH</b>     |          |          |           |                  |                        |
| O2–H2...O5                                                                      | 0.80(5)  | 1.94(5)  | 2.737(5)  | 177(8)           | $-x, 1-y, 2-z$         |
| O6–H6...O7                                                                      | 0.81(5)  | 1.89(5)  | 2.671(6)  | 163(6)           | $x, y, z$              |
| O7–H7A...N2                                                                     | 0.81(5)  | 2.08(5)  | 2.878(6)  | 168(6)           | $1-x, 1-y, 1-z$        |
| C6–H6A...O4                                                                     | 0.93     | 2.60     | 3.203(6)  | 123              | $-x, 1-y, 1-z$         |
| <b>[Mo<sub>2</sub>O<sub>4</sub>(MeOH)<sub>2</sub>(L<sup>5</sup>)]</b>           |          |          |           |                  |                        |
| O5–H5...O4                                                                      | 0.88(8)  | 1.88(2)  | 2.728(5)  | 164(4)           | $2-x, 1-y, 1-z$        |
| C6–H6...O3                                                                      | 0.95     | 2.53     | 3.360(7)  | 146              | $-1+x, y, z$           |
| C9–H9A...O1                                                                     | 0.99     | 2.58     | 3.464(6)  | 148              | $x, -1+y, z$           |
| <b>[Mo<sub>2</sub>O<sub>4</sub>(MeOH)<sub>2</sub>(L<sup>6</sup>)]</b>           |          |          |           |                  |                        |
| O5–H5...N2                                                                      | 0.88(5)  | 1.91(5)  | 2.762(12) | 165(9)           | $1/2-x, -1/2+y, 1/2-z$ |
| C7–H7...O4                                                                      | 0.95     | 2.60     | 3.525(14) | 165              | $x, 1+y, z$            |
| C14–H14...O4                                                                    | 0.95     | 2.55     | 3.300(15) | 136              | $x, 1+y, z$            |
| <b>[Mo<sub>2</sub>O<sub>4</sub>(MeOH)<sub>2</sub>(L<sup>7</sup>)]</b>           |          |          |           |                  |                        |
| O5–H5...N2                                                                      | 0.82(6)  | 1.96(6)  | 2.770(6)  | 169(6)           | $x, 1-y, -1/2+z$       |
| C4–H4...O6                                                                      | 0.95     | 2.47     | 3.417(7)  | 173              | $1/2-x, 1/2-y, -z$     |
| C7–H7...O4                                                                      | 0.95     | 2.50     | 3.306(7)  | 142              | $x, 1+y, z$            |
| C9–H9A...O4                                                                     | 0.99     | 2.56     | 3.293(7)  | 131              | $x, -y, 1/2+z$         |
| C11–H11C...O2                                                                   | 0.98     | 2.36     | 3.285(8)  | 156              | $x, -y, -1/2+z$        |
| <b>[Mo<sub>2</sub>O<sub>4</sub>(MeOH)<sub>2</sub>(L<sup>8</sup>)]·2MeOH</b>     |          |          |           |                  |                        |
| O3–H3...O5                                                                      | 0.84     | 1.92     | 2.757(3)  | 171              | $1-x, 1-y, 1-z$        |
| O6–H6...O7                                                                      | 0.84     | 1.80     | 2.627(3)  | 167              | $x, y, z$              |
| O7–H7A...N2                                                                     | 0.84     | 2.03     | 2.847(4)  | 163              | $x, 1/2-y, -1/2+z$     |
| C11–H11B...O2                                                                   | 0.98     | 2.42     | 3.248(5)  | 142              | $-x, 1-y, 1-z$         |

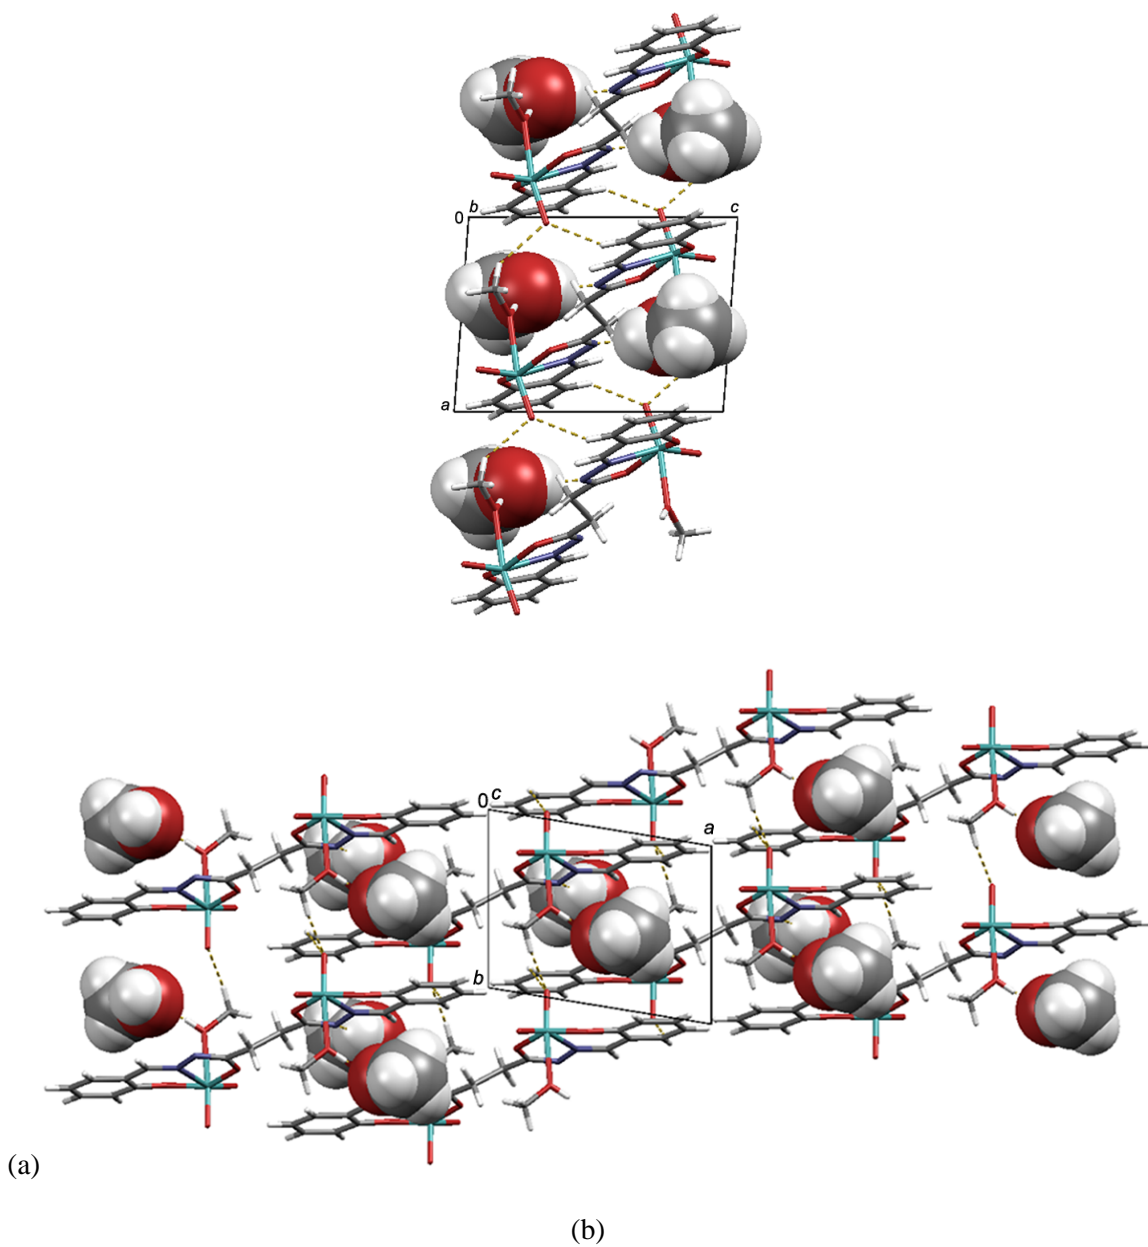

**Figure S3.** Fragment of crystal structure in  $[\text{Mo}_2\text{O}_4(\text{MeOH})_2(\text{L}^1)] \cdot 2\text{MeOH}$  shown down the: (a) *b*-axis, and (b) *c*-axis. Crystal methanol molecules are shown in a spacefill style.

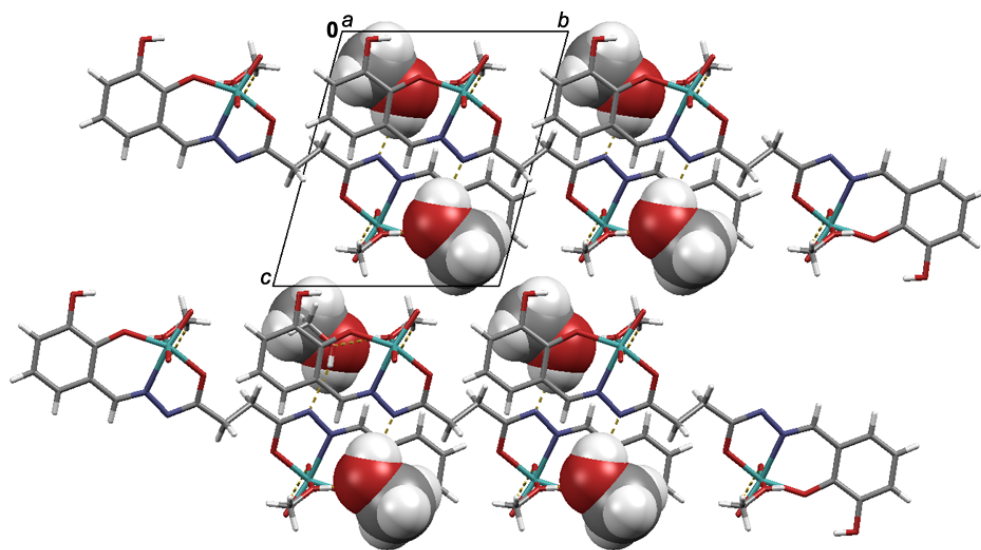

(a)

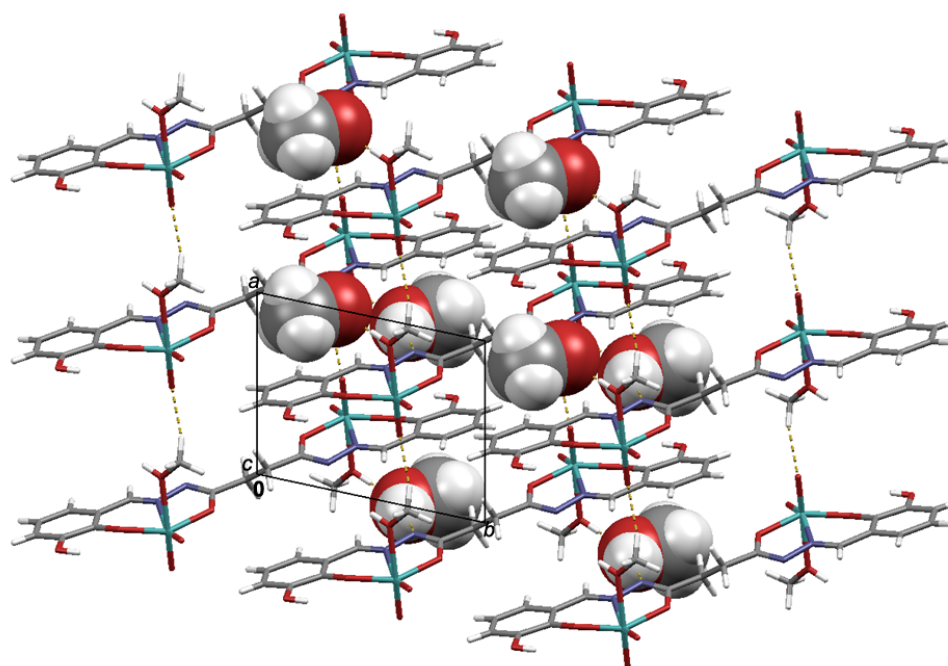

(b)

**Figure S4.** Fragment of crystal structure in  $[\text{Mo}_2\text{O}_4(\text{MeOH})_2(\text{L}^3)] \cdot 2\text{MeOH}$  shown down the: (a)  $a$ -axis, and (b)  $c$ -axis.

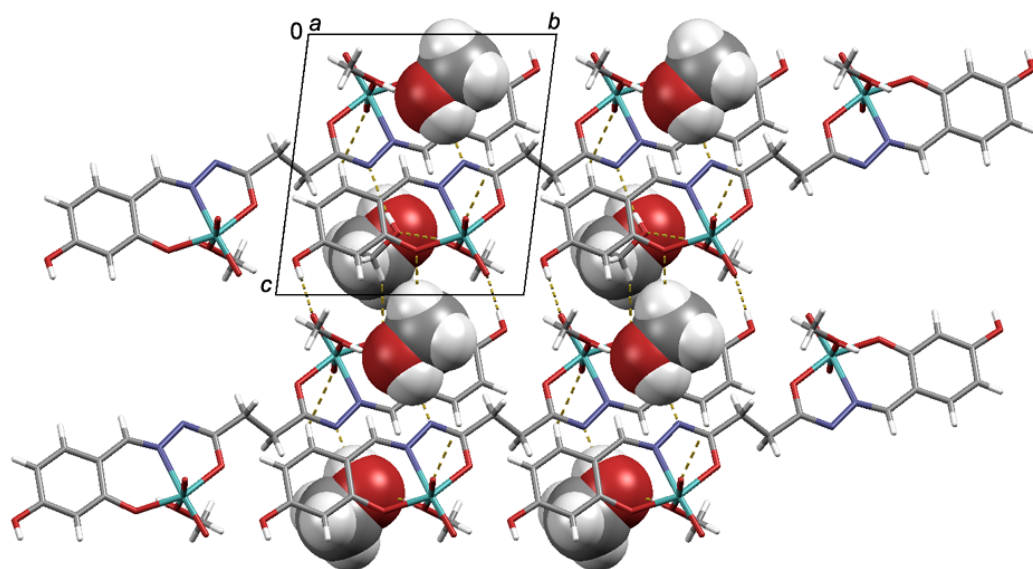

(a)

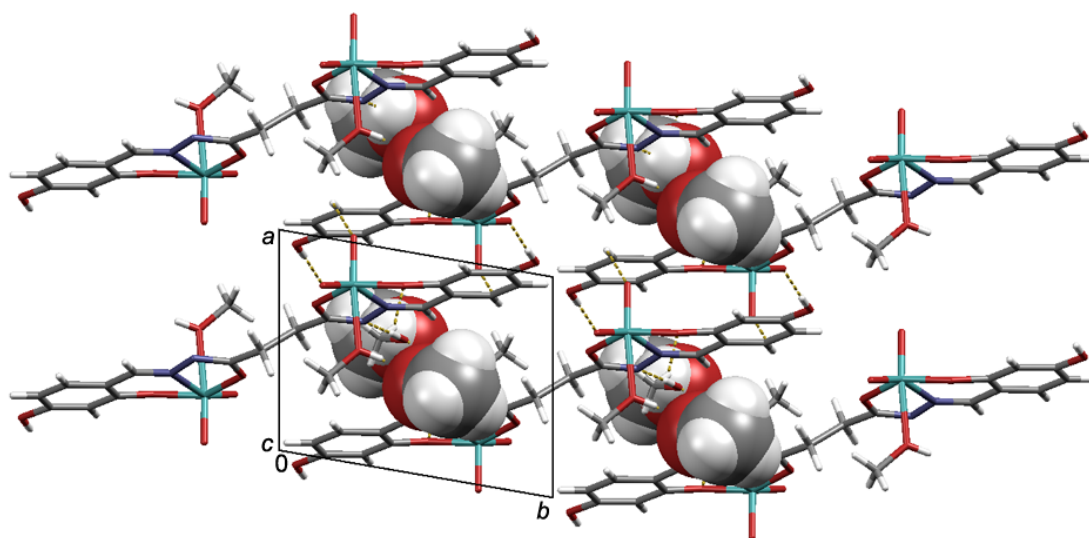

(b)

**Figure S5.** Fragment of crystal structure in  $[\text{Mo}_2\text{O}_4(\text{MeOH})_2(\text{L}^4)] \cdot 2\text{MeOH}$  shown down the: (a)  $a$ -axis, and (b)  $c$ -axis.



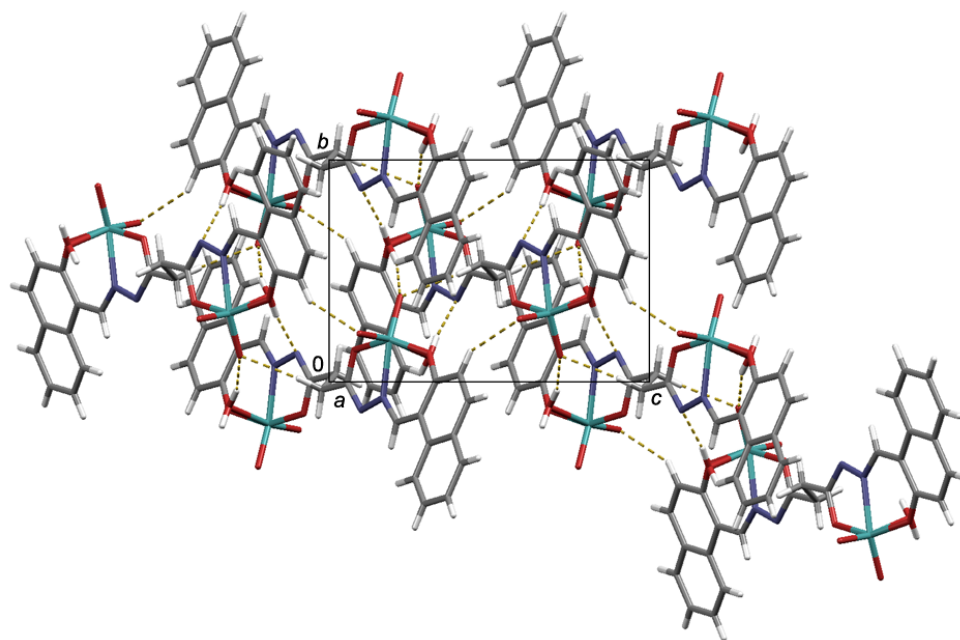

(a)

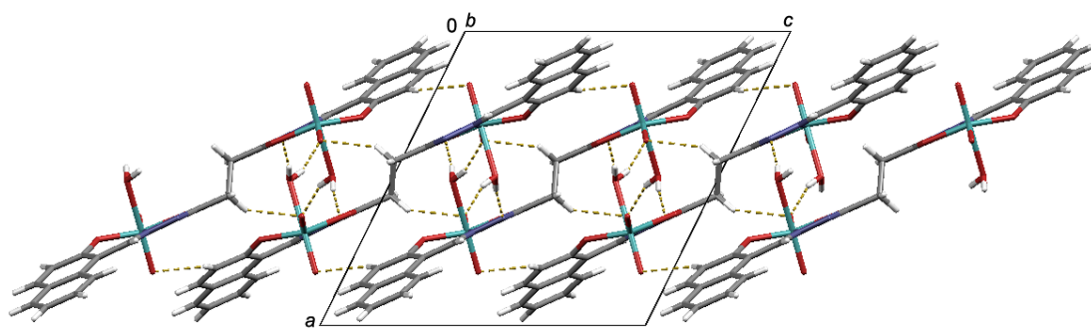

(b)

**Figure S6.** Fragment of crystal structure in  $[\text{Mo}_2\text{O}_4(\text{H}_2\text{O})_2(\text{L}^2)]$  shown down the: (a) *a*-axis, and (b) *b*-axis.

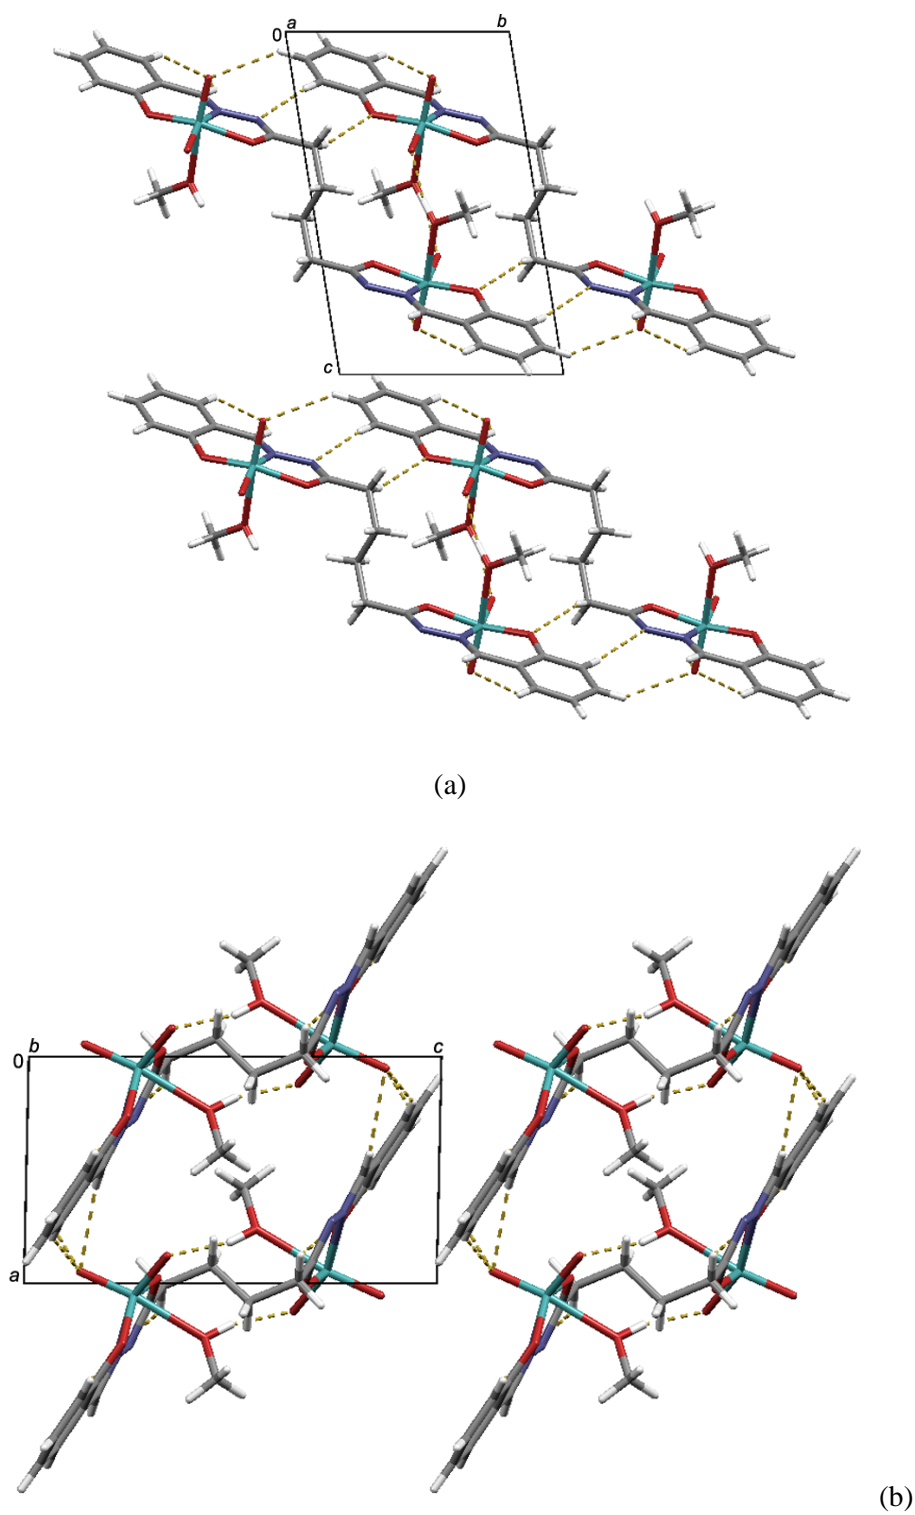

**Figure S7.** Fragment of crystal structure in  $[\text{Mo}_2\text{O}_4(\text{MeOH})_2(\text{L}^5)]$  shown down the: (a)  $a$ -axis, and (b)  $b$ -axis.

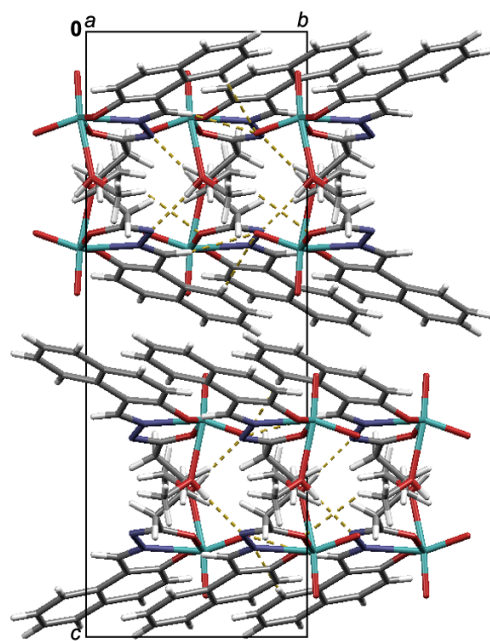

(a)

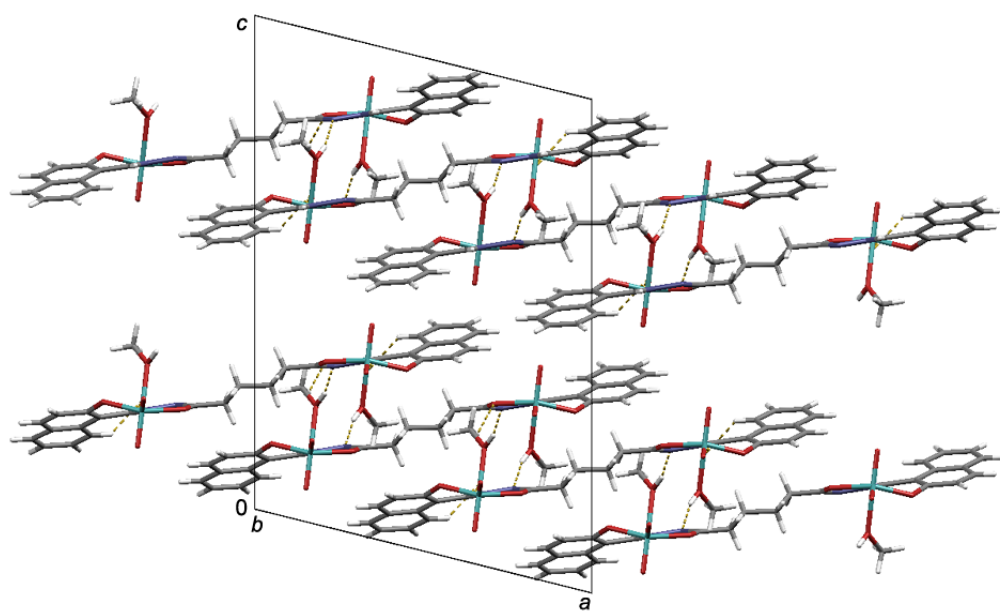

(b)

**Figure S8.** Fragment of crystal structure in  $[\text{Mo}_2\text{O}_4(\text{MeOH})_2(\text{L}^6)]$  shown down the: (a)  $a$ -axis, and (b)  $b$ -axis.

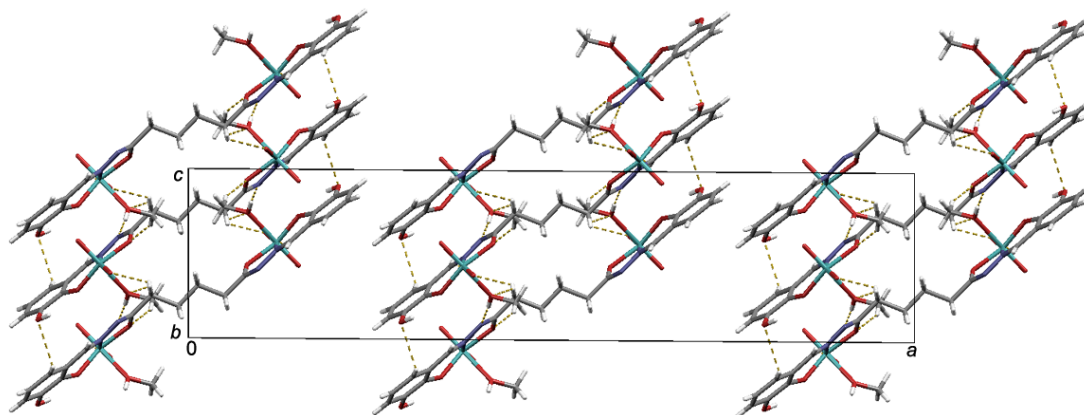

(a)

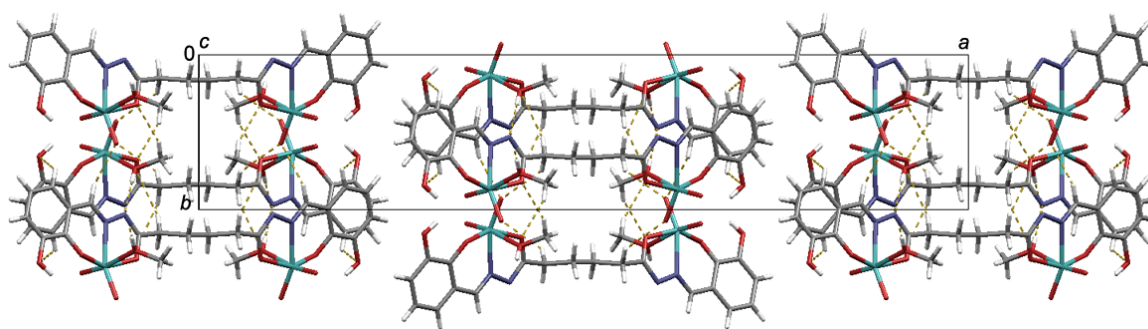

(b)

**Figure S9.** Fragment of crystal structure in  $[\text{Mo}_2\text{O}_4(\text{MeOH})_2(\text{L}^7)]$  shown down the: (a)  $b$ -axis, and (b)  $c$ -axis.

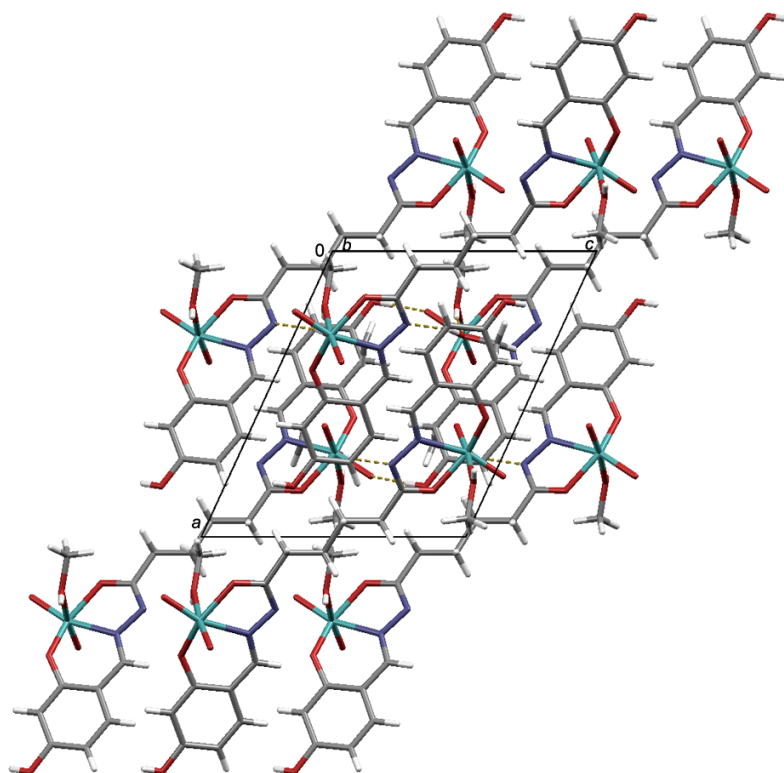

(a)

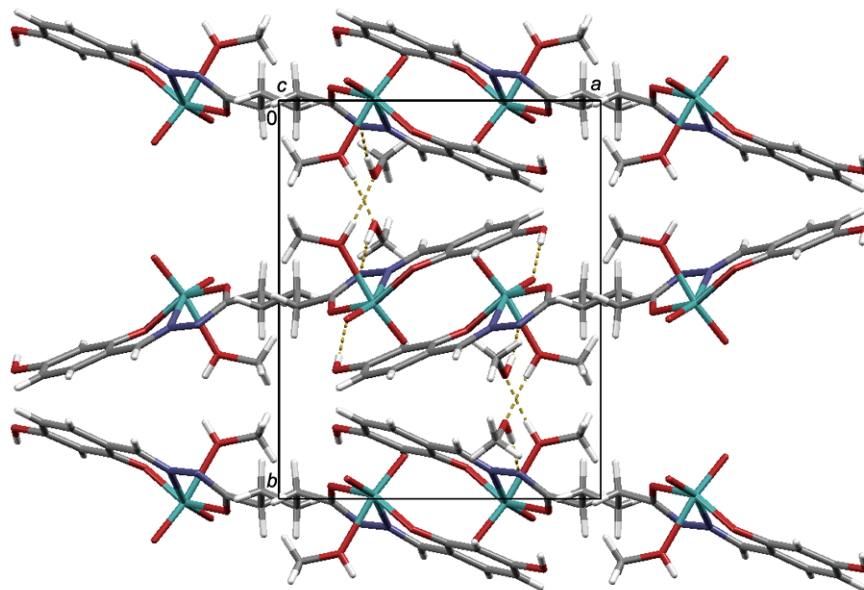

(b)

**Figure S10.** Fragment of crystal structure in  $[\text{Mo}_2\text{O}_4(\text{MeOH})_2(\text{L}^8)] \cdot 2\text{MeOH}$  shown down the: (a)  $b$ -axis, and (b)  $c$ -axis.

## TGA Analysis

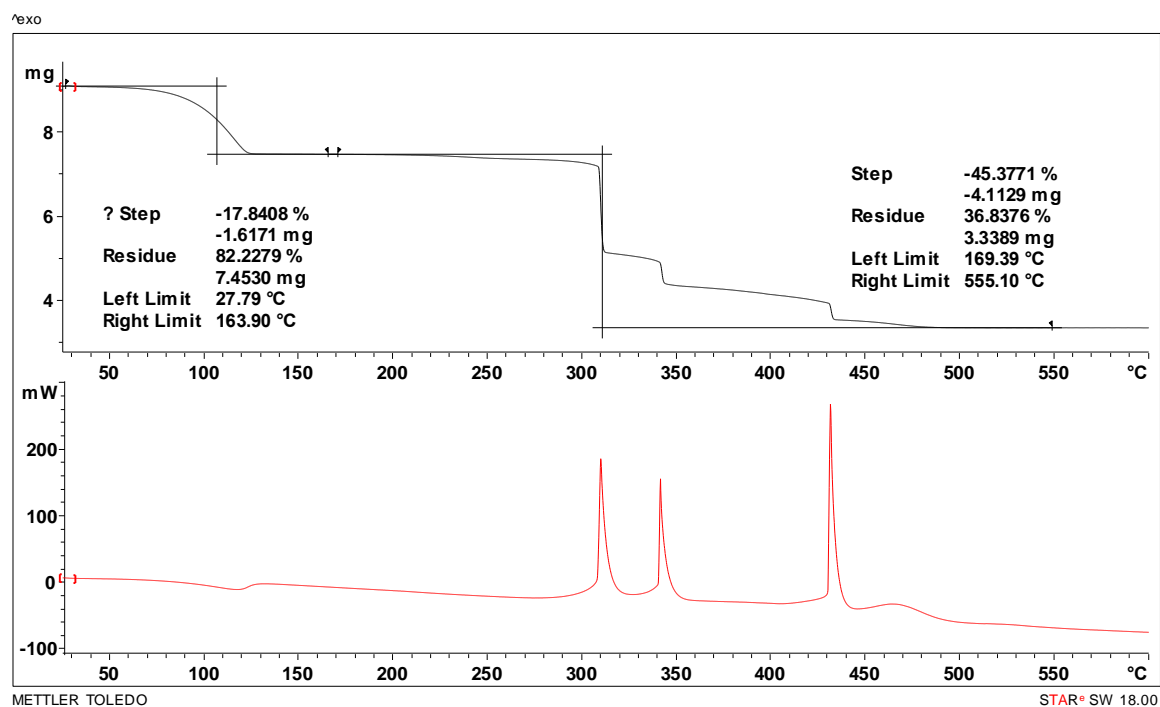

**Figure S11.** TGA/DSC analysis of  $[\text{Mo}_2\text{O}_4(\text{MeOH})_2(\text{L}^1)] \cdot 2\text{MeOH}$ .

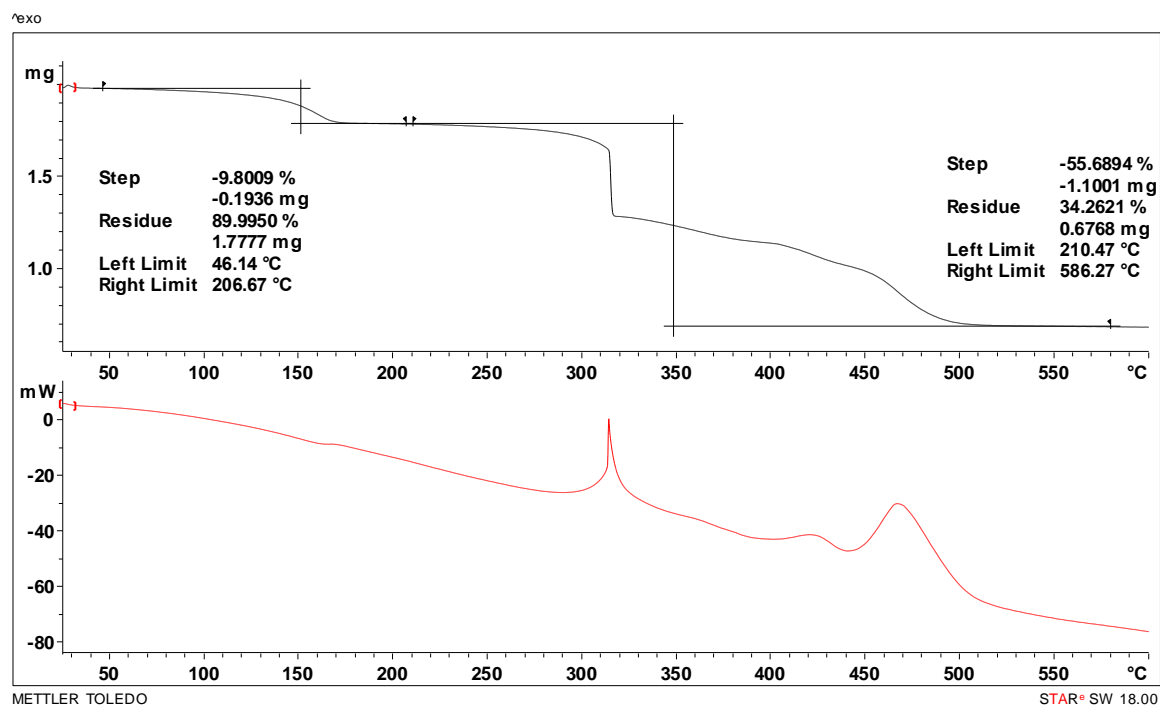

**Figure S12.** TGA/DSC analysis of  $[\text{Mo}_2\text{O}_4(\text{MeOH})_2(\text{L}^2)]$ .

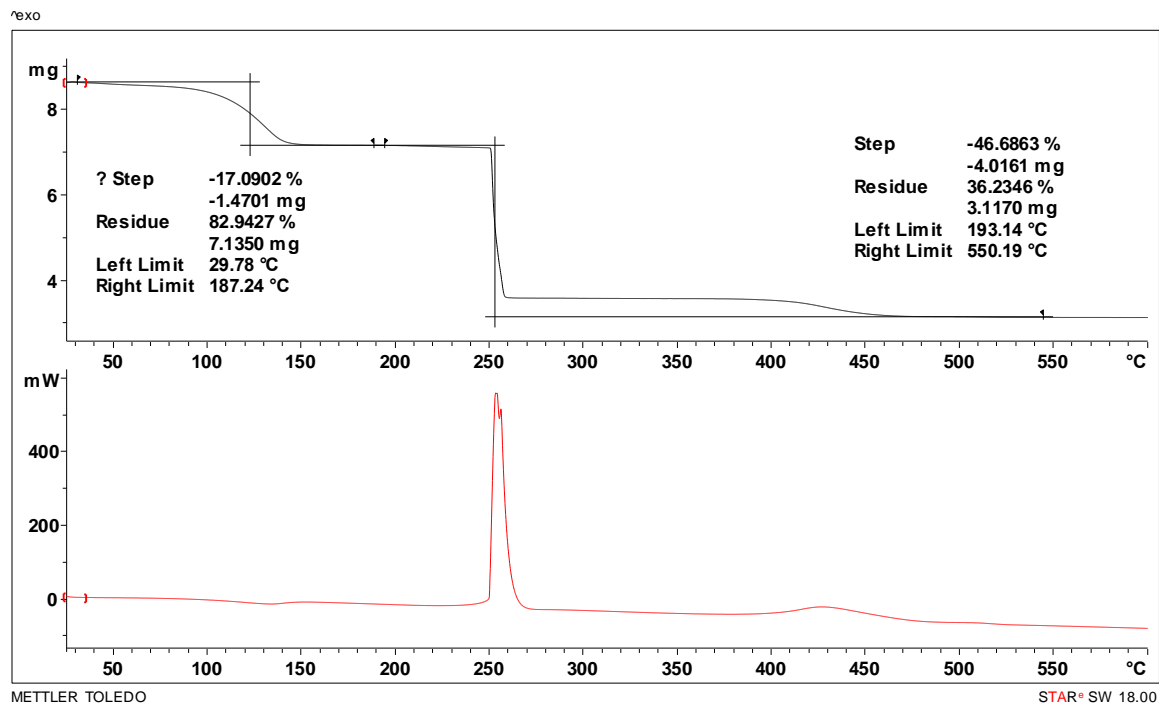

**Figure S13.** TGA/DSC analysis of  $[\text{Mo}_2\text{O}_4(\text{MeOH})_2(\text{L}^3)] \cdot 2\text{MeOH}$ .

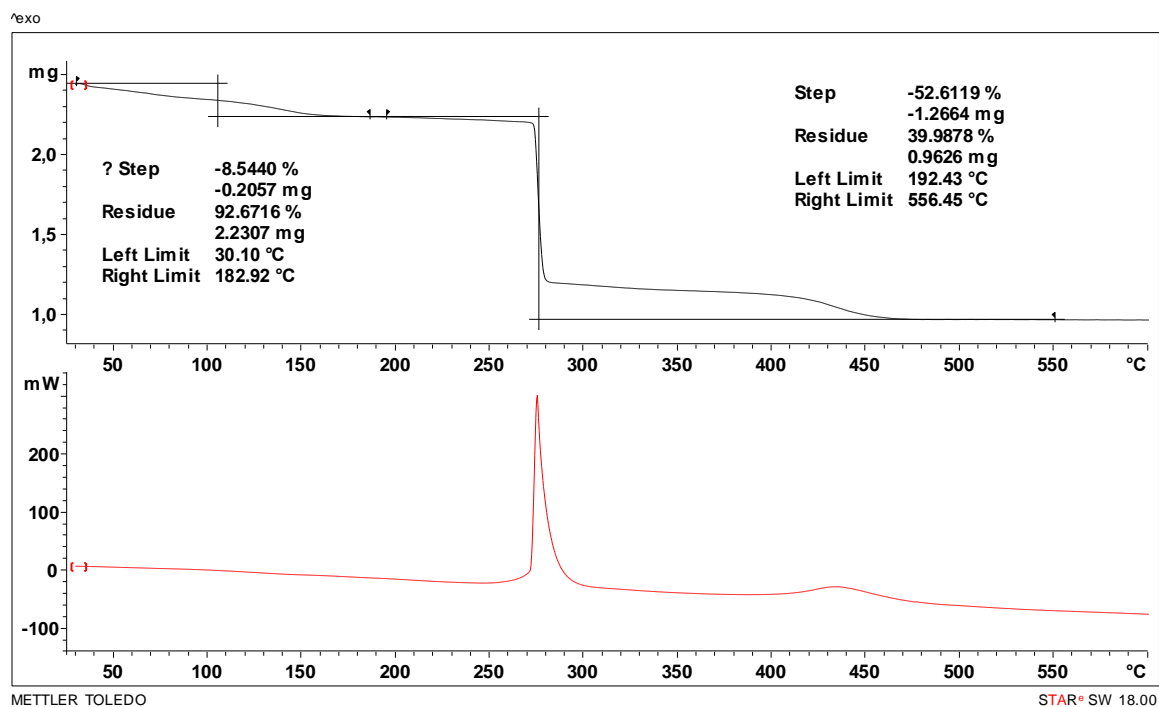

**Figure S14.** TGA/DSC analysis of  $[\text{Mo}_2\text{O}_4(\text{MeOH})_2(\text{L}^4)]$ .

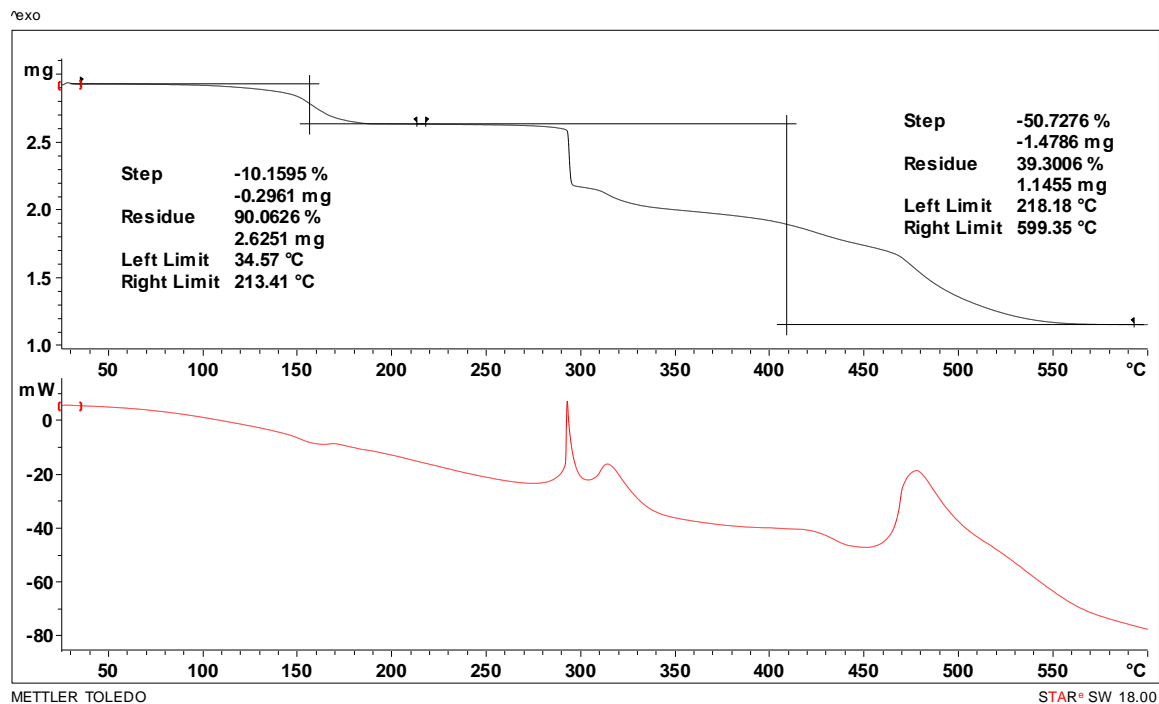

**Figure S15.** TGA/DSC analysis of [Mo<sub>2</sub>O<sub>4</sub>(MeOH)<sub>2</sub>(L<sup>5</sup>)].

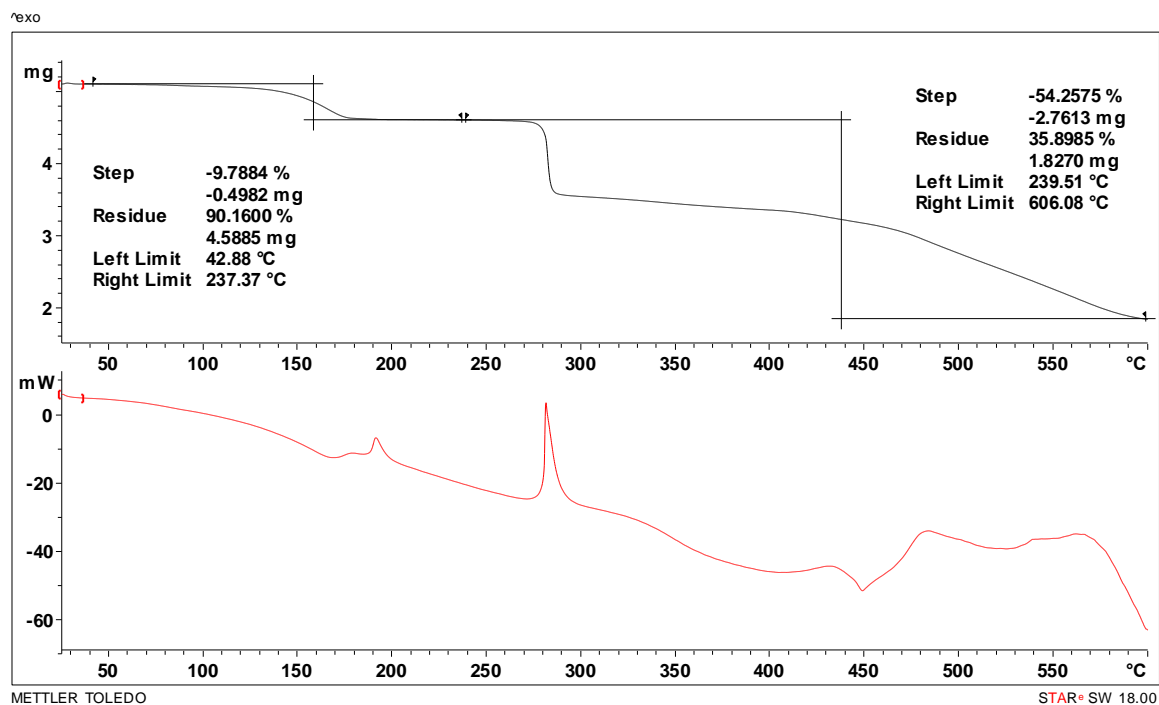

**Figure S16.** TGA/DSC analysis of [Mo<sub>2</sub>O<sub>4</sub>(MeOH)<sub>2</sub>(L<sup>6</sup>)].



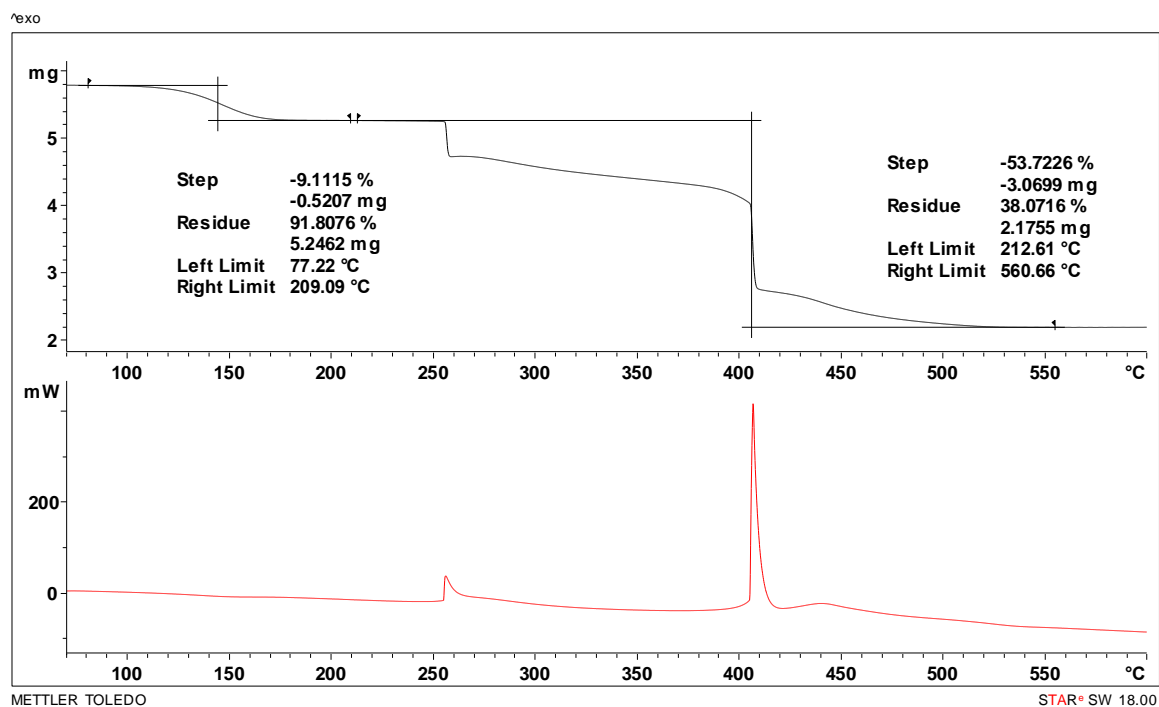

**Figure S17.** TGA/DSC analysis of [Mo<sub>2</sub>O<sub>4</sub>(MeOH)<sub>2</sub>(L<sup>7</sup>)].

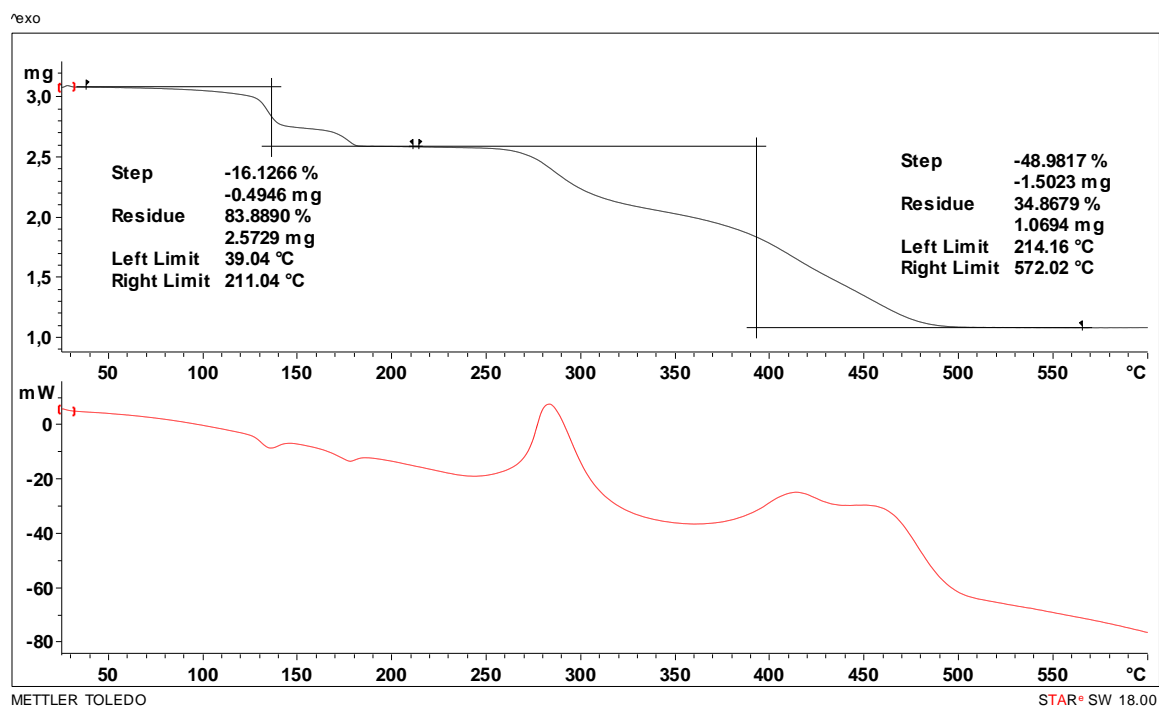

**Figure S18.** TGA/DSC analysis of [Mo<sub>2</sub>O<sub>4</sub>(MeOH)<sub>2</sub>(L<sup>8</sup>)]·2MeOH.

## Powder X-ray diffraction

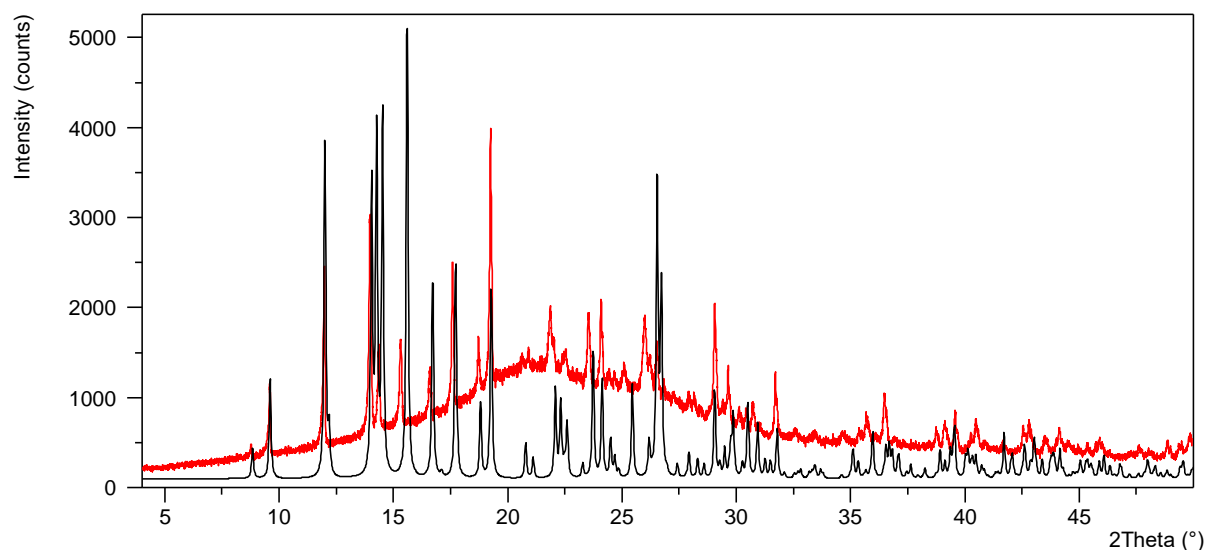

**Figure S19.** Measured (red) and calculated (black) powder X-ray diffraction pattern of  $[\text{Mo}_2\text{O}_4(\text{MeOH})_2(\text{L}^1)] \cdot 2\text{MeOH}$ . The small differences between peak positions and intensities can be attributed to difference in data collection temperature for powder and single-crystal data.

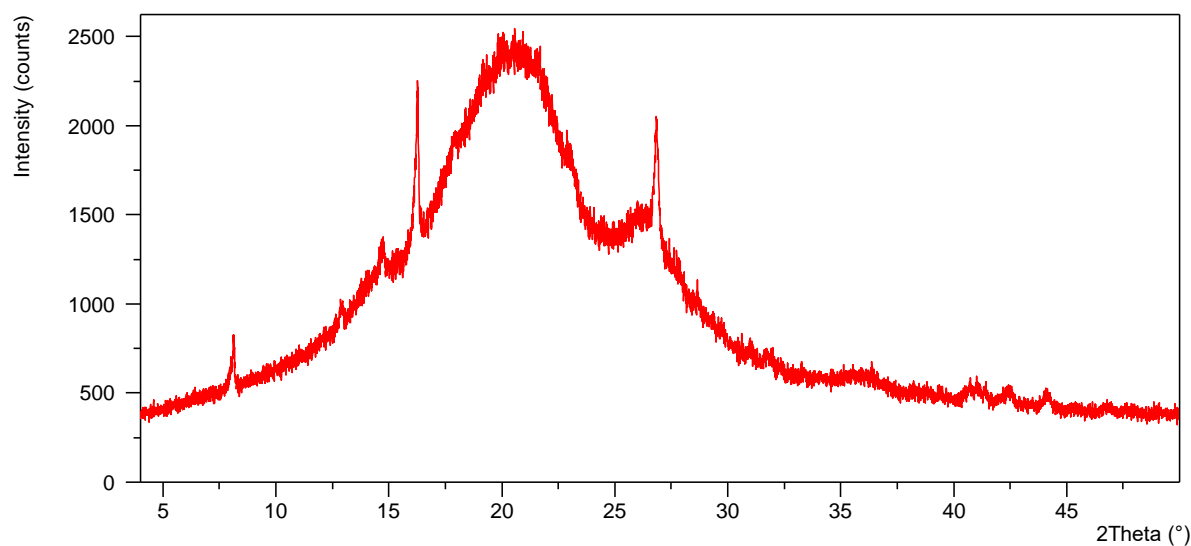

**Figure S20.** Measured powder X-ray diffraction pattern of  $[\text{Mo}_2\text{O}_4(\text{MeOH})_2(\text{L}^2)]$ . The pattern shows significant contribution from amorphous phase and low crystallinity. As the single crystal differs in coordinated solvent, no attempt in comparison to calculated data was made.

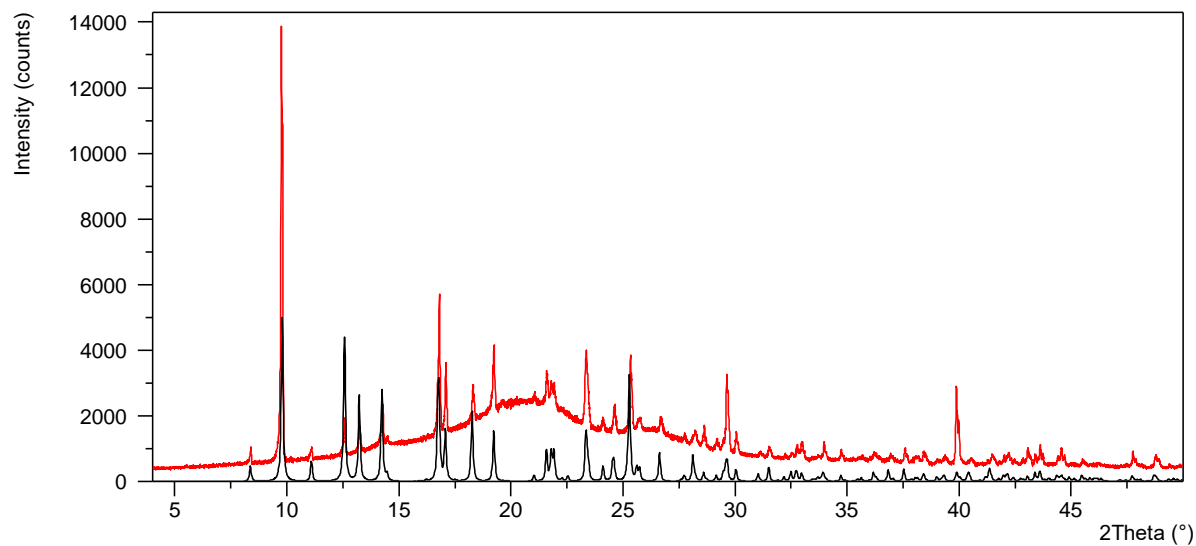

**Figure S21.** Measured (red) and calculated (black) powder X-ray diffraction pattern of  $[\text{Mo}_2\text{O}_4(\text{MeOH})_2(\text{L}^3)] \cdot 2\text{MeOH}$ . The small differences between peak positions and intensities can be attributed to difference in data collection temperature for powder and single-crystal data.

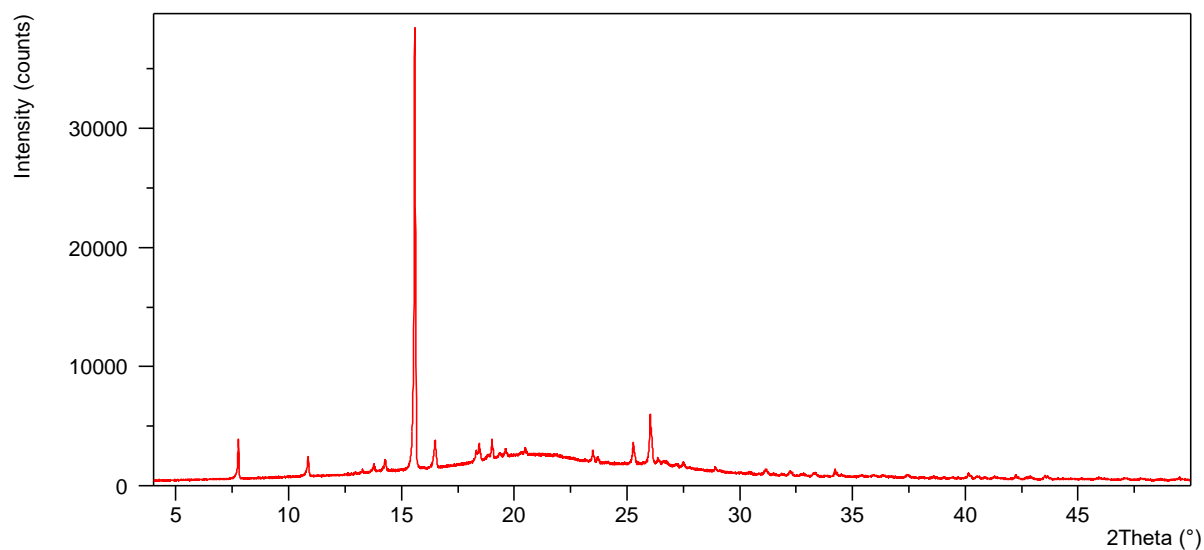

**Figure S22.** Measured powder X-ray diffraction pattern of  $[\text{Mo}_2\text{O}_4(\text{MeOH})_2(\text{L}^4)]$ . The pattern shows significant contribution from amorphous phase and low crystallinity. As the single crystal contains additional crystal solvent, no attempt in comparison to calculated data was made.

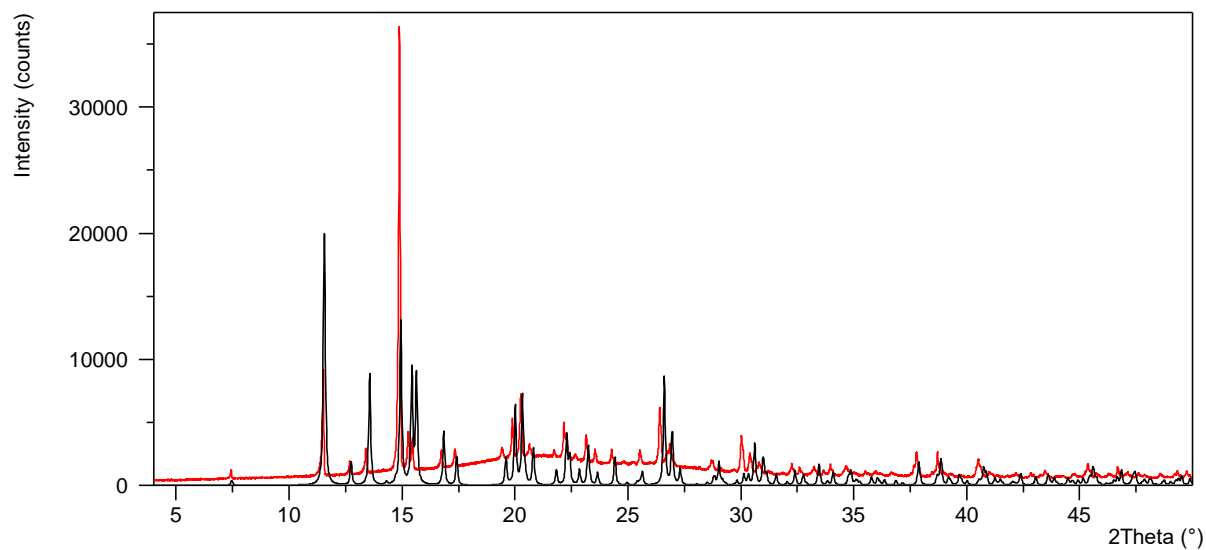

**Figure S23.** Measured (red) and calculated (black) powder X-ray diffraction pattern of  $[\text{Mo}_2\text{O}_4(\text{MeOH})_2(\text{L}^5)]$ . The small differences between peak positions and intensities can be attributed to difference in data collection temperature for powder and single-crystal data.

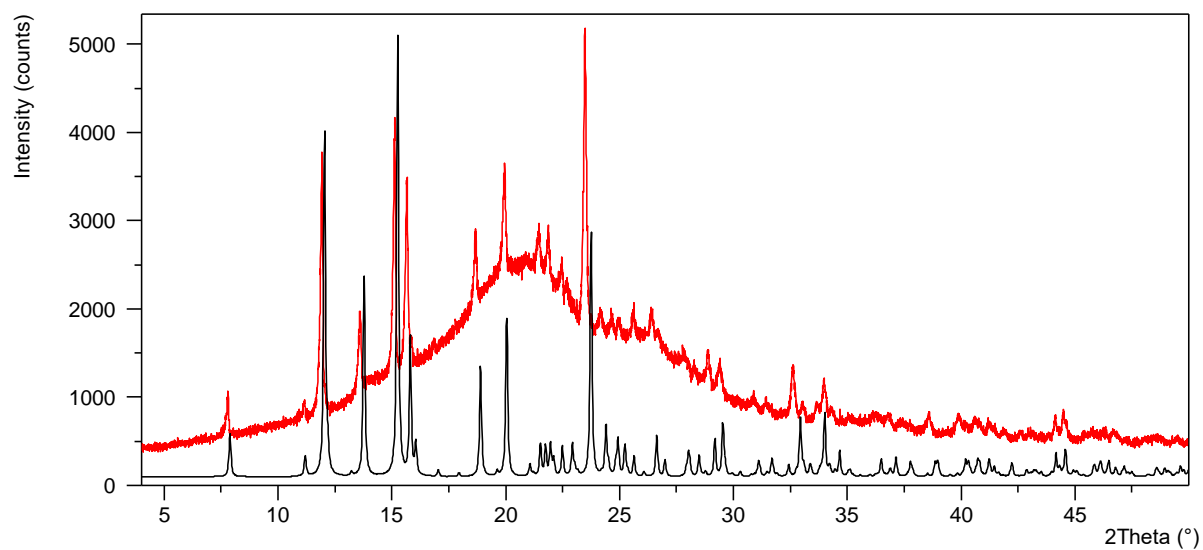

**Figure S24.** Measured (red) and calculated (black) powder X-ray diffraction pattern of  $[\text{Mo}_2\text{O}_4(\text{MeOH})_2(\text{L}^6)]$ . The small differences between peak positions and intensities can be attributed to difference in data collection temperature for powder and single-crystal data.

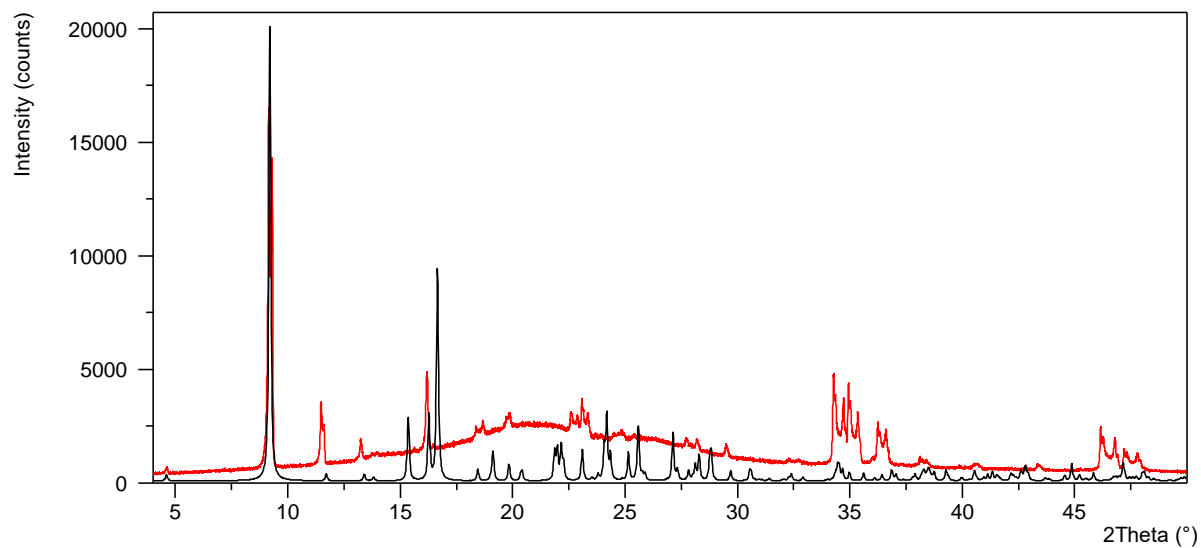

**Figure S25.** Measured (red) and calculated (black) powder X-ray diffraction pattern of  $[\text{Mo}_2\text{O}_4(\text{MeOH})_2(\text{L}^7)]$ . The small differences between peak positions and intensities can be attributed to difference in data collection temperature for powder and single-crystal data.

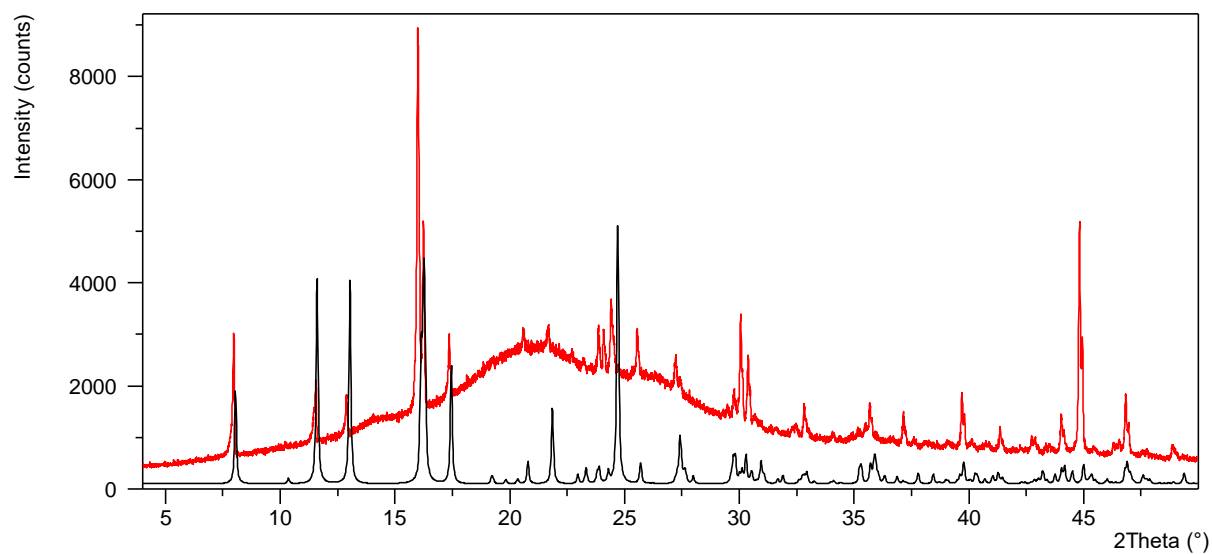

**Figure S26.** Measured (red) and calculated (black) powder X-ray diffraction pattern of  $[\text{Mo}_2\text{O}_4(\text{MeOH})_2(\text{L}^8)] \cdot 2\text{MeOH}$ . The small differences between peak positions and intensities can be attributed to difference in data collection temperature for powder and single-crystal data.

# NMR spectroscopy

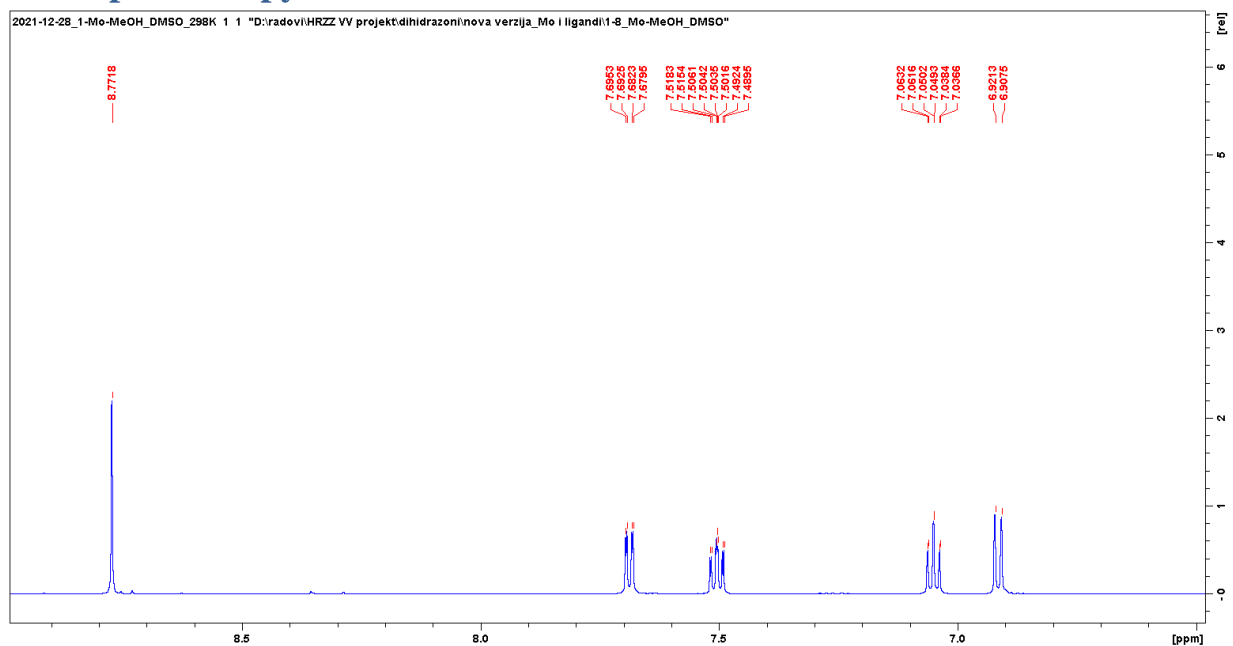

(a)

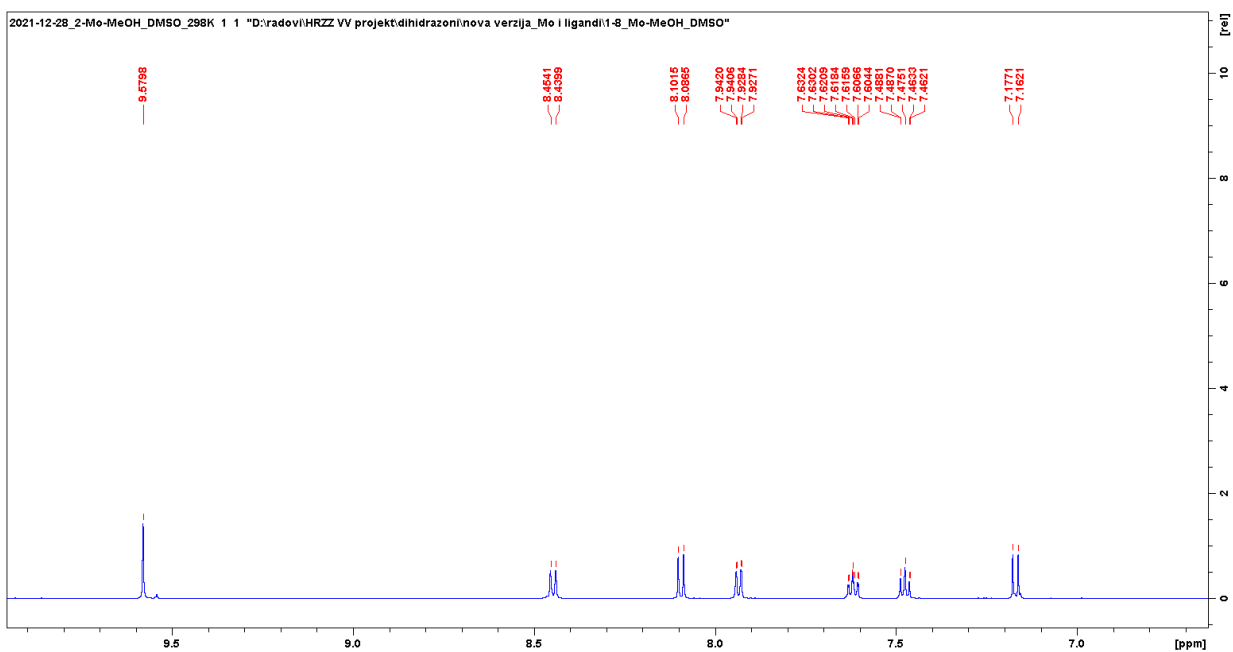

(b)

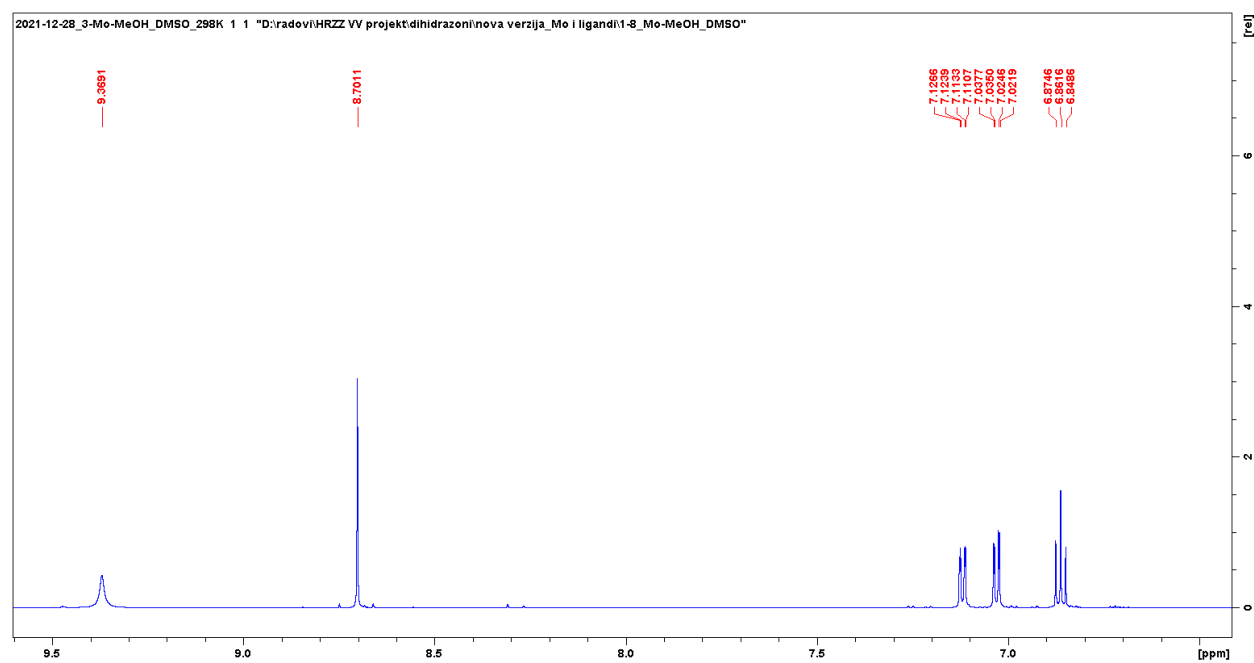

(c)

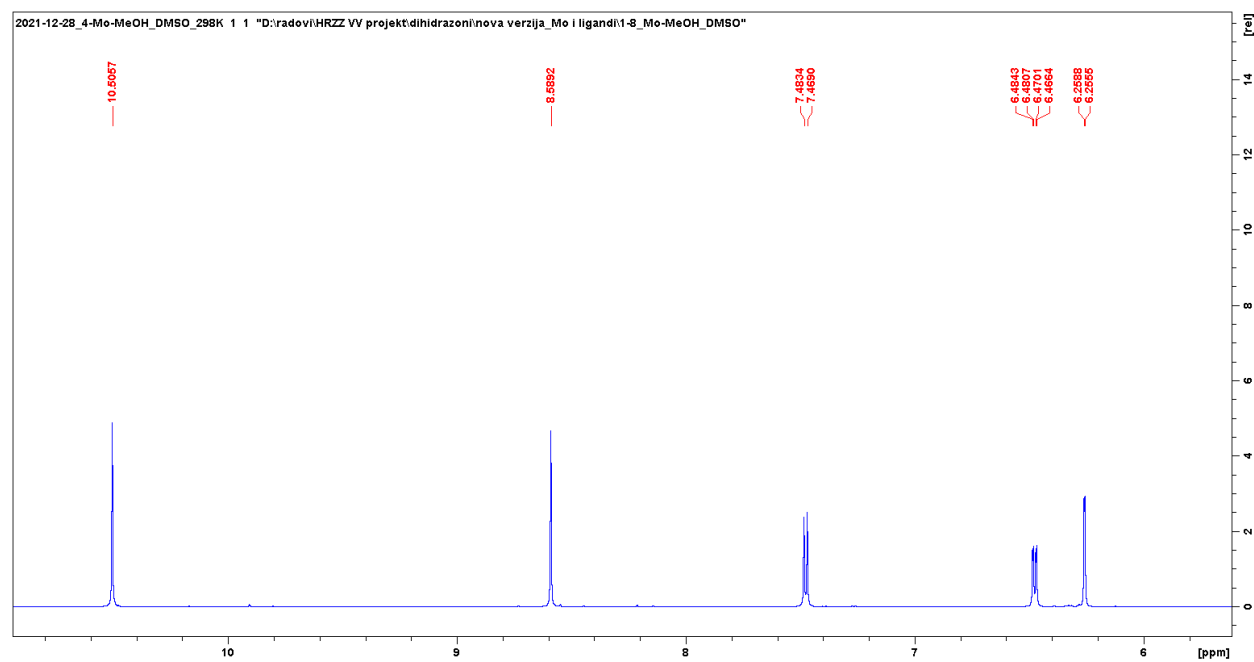

(d)

**Figure S27.**  $^1\text{H}$  NMR spectra in selected region for succinyl-type of complexes: (a)  $[\text{Mo}_2\text{O}_4(\text{MeOH})_2(\text{L}^1)]$ ; (b)  $[\text{Mo}_2\text{O}_4(\text{MeOH})_2(\text{L}^2)]$ ; (c)  $[\text{Mo}_2\text{O}_4(\text{MeOH})_2(\text{L}^3)]$ ; (d)  $[\text{Mo}_2\text{O}_4(\text{MeOH})_2(\text{L}^4)]$  in  $\text{DMSO}-d_6$  at 298 K

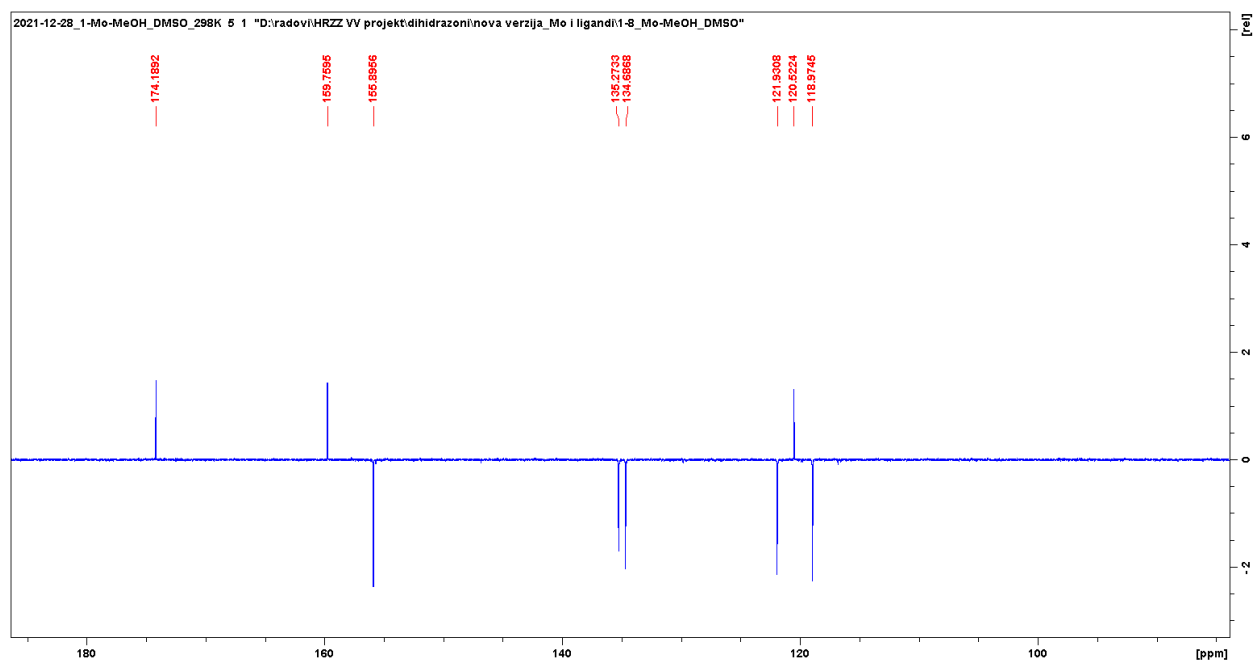

(a)

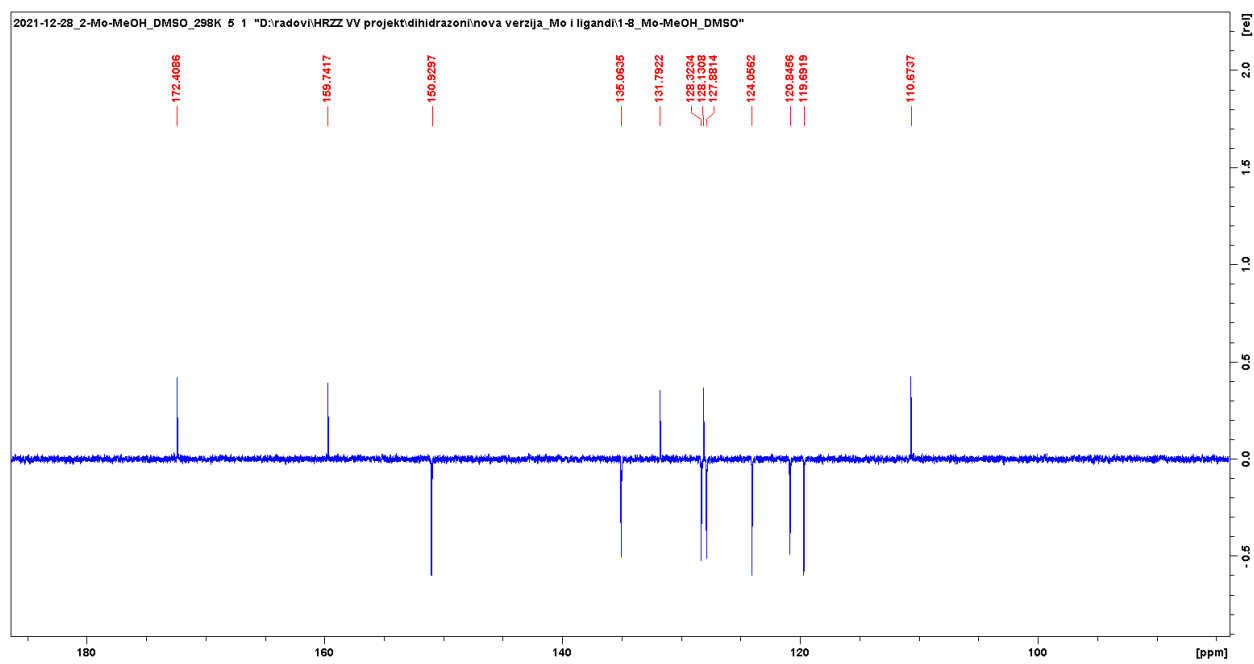

(b)



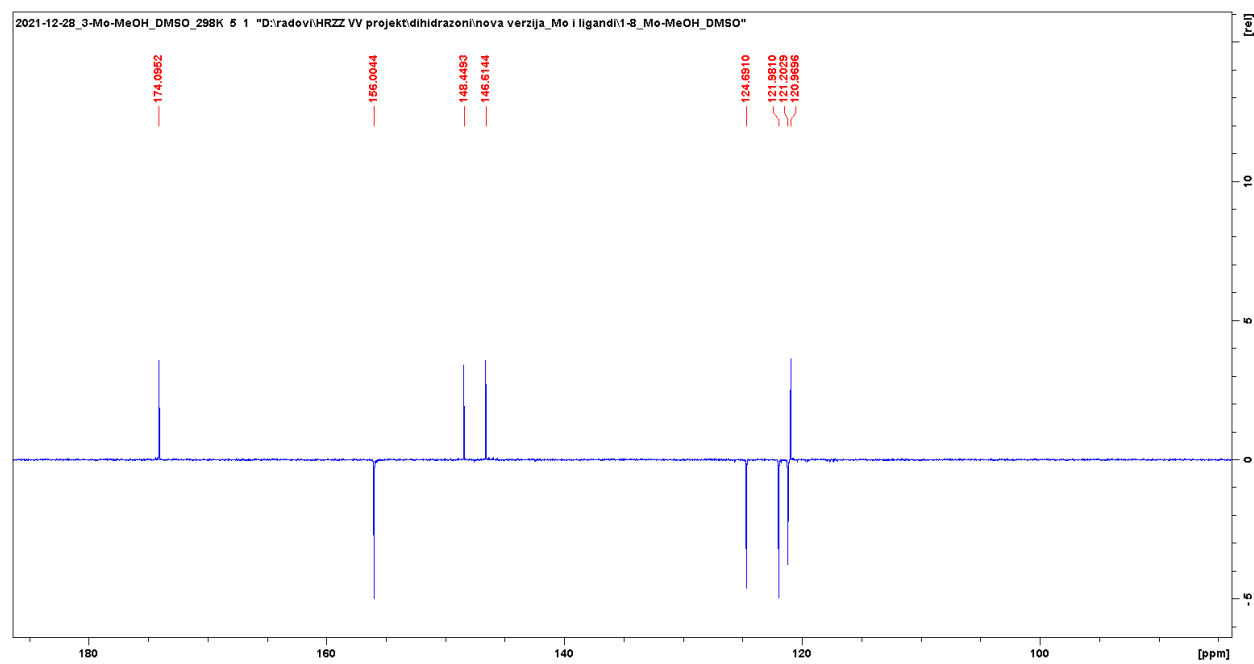

(c)

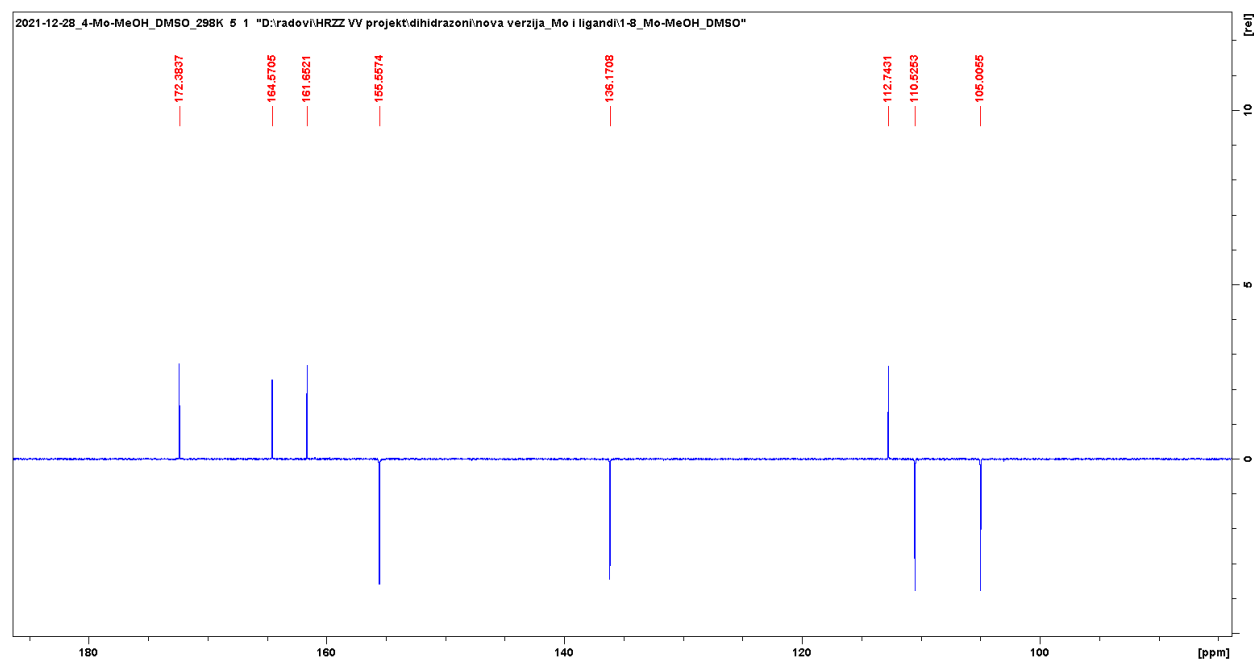

(d)

**Figure S28.**  $^{13}\text{C}$  NMR spectra in selected region for succinyl-type of complexes: (a)  $[\text{Mo}_2\text{O}_4(\text{MeOH})_2(\text{L}^1)]$ ; (b)  $[\text{Mo}_2\text{O}_4(\text{MeOH})_2(\text{L}^2)]$ ; (c)  $[\text{Mo}_2\text{O}_4(\text{MeOH})_2(\text{L}^3)]$ ; (d)  $[\text{Mo}_2\text{O}_4(\text{MeOH})_2(\text{L}^4)]$  in  $\text{DMSO}-d_6$  at 298 K.

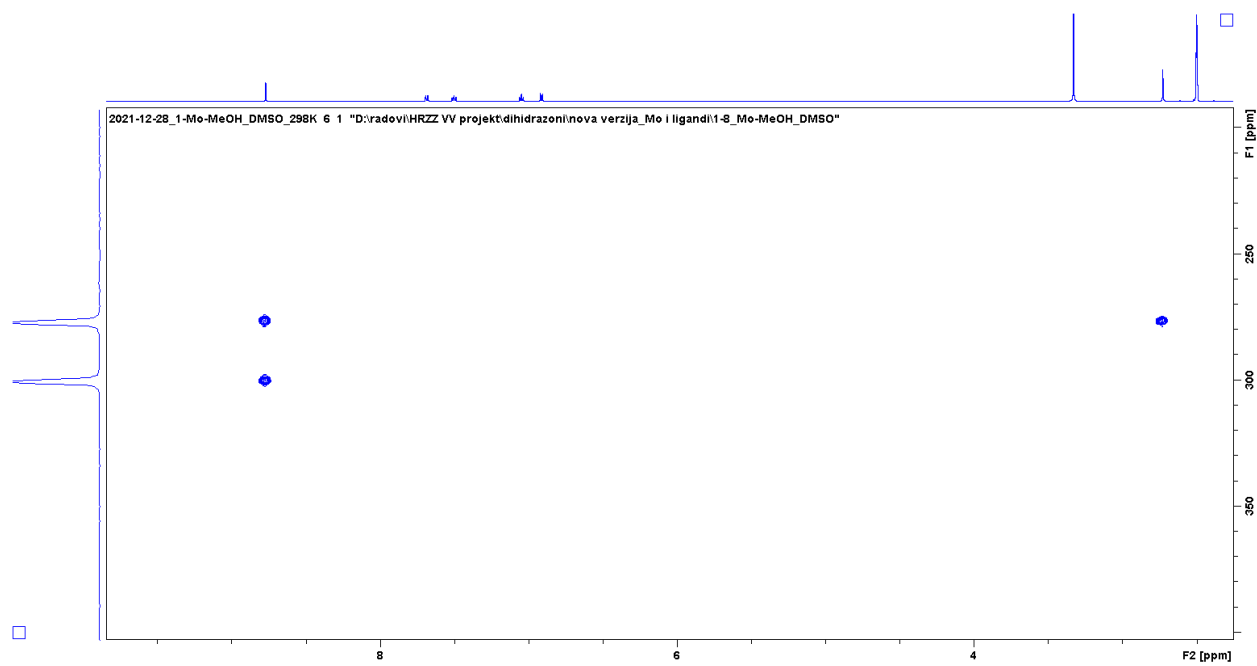

(a)

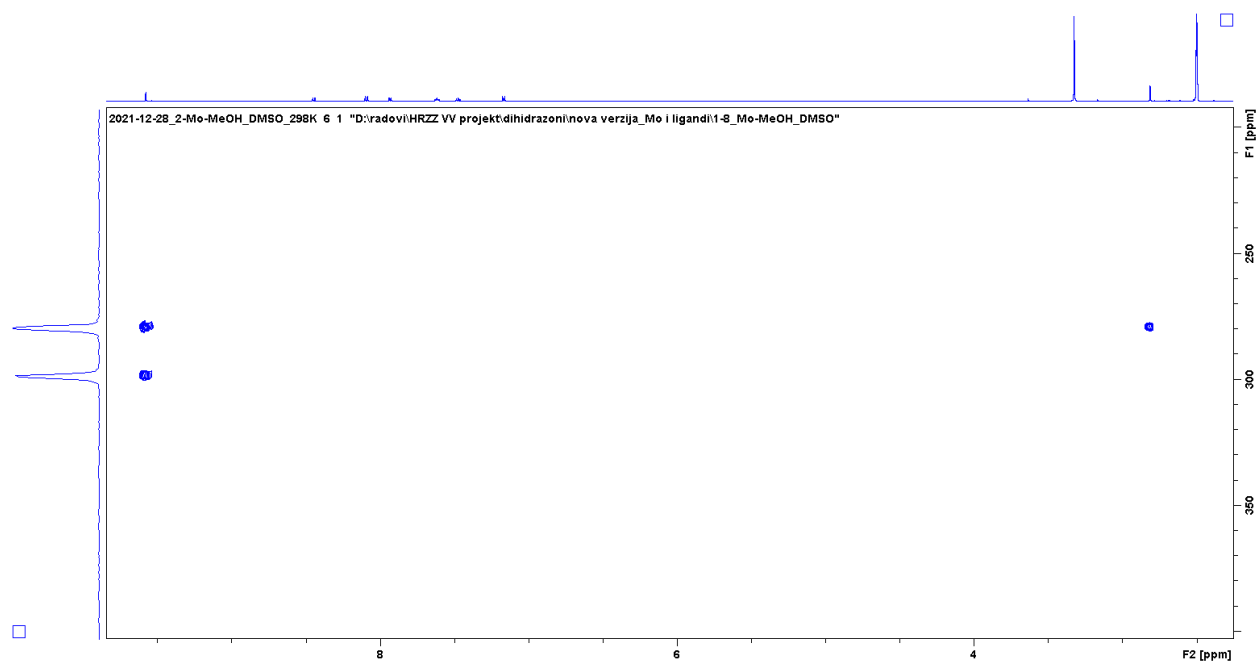

(b)

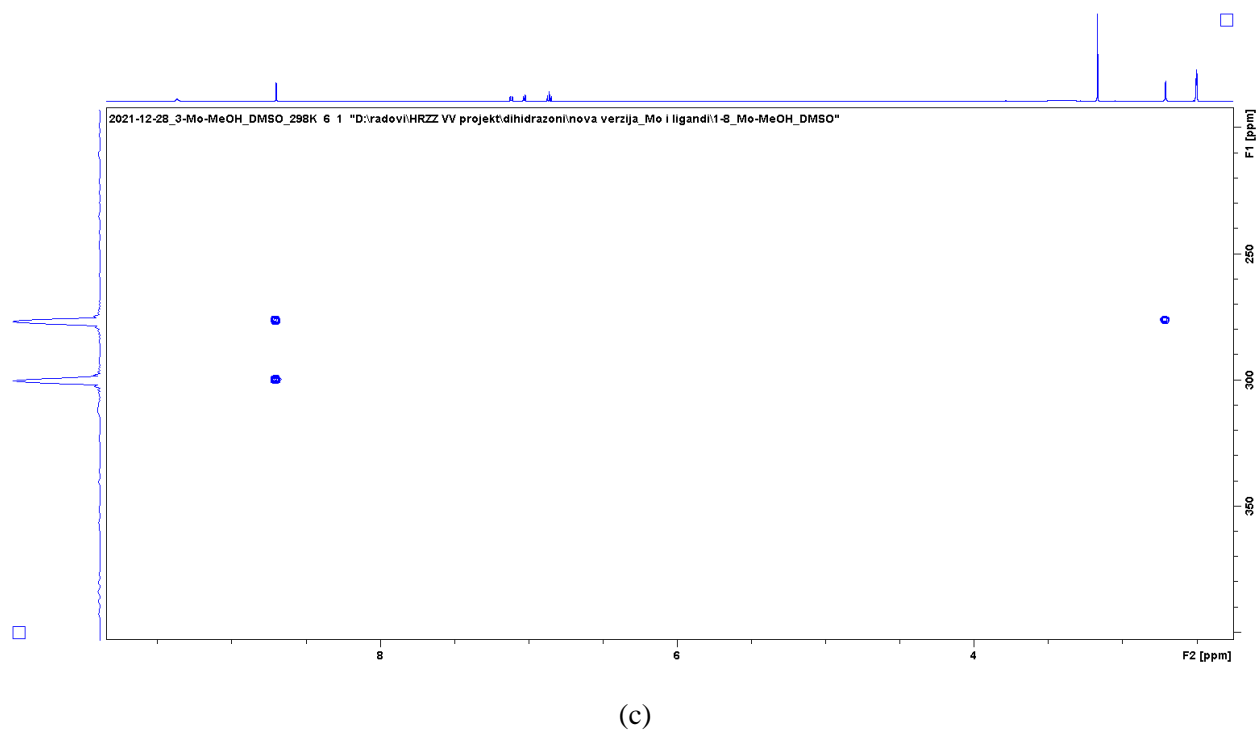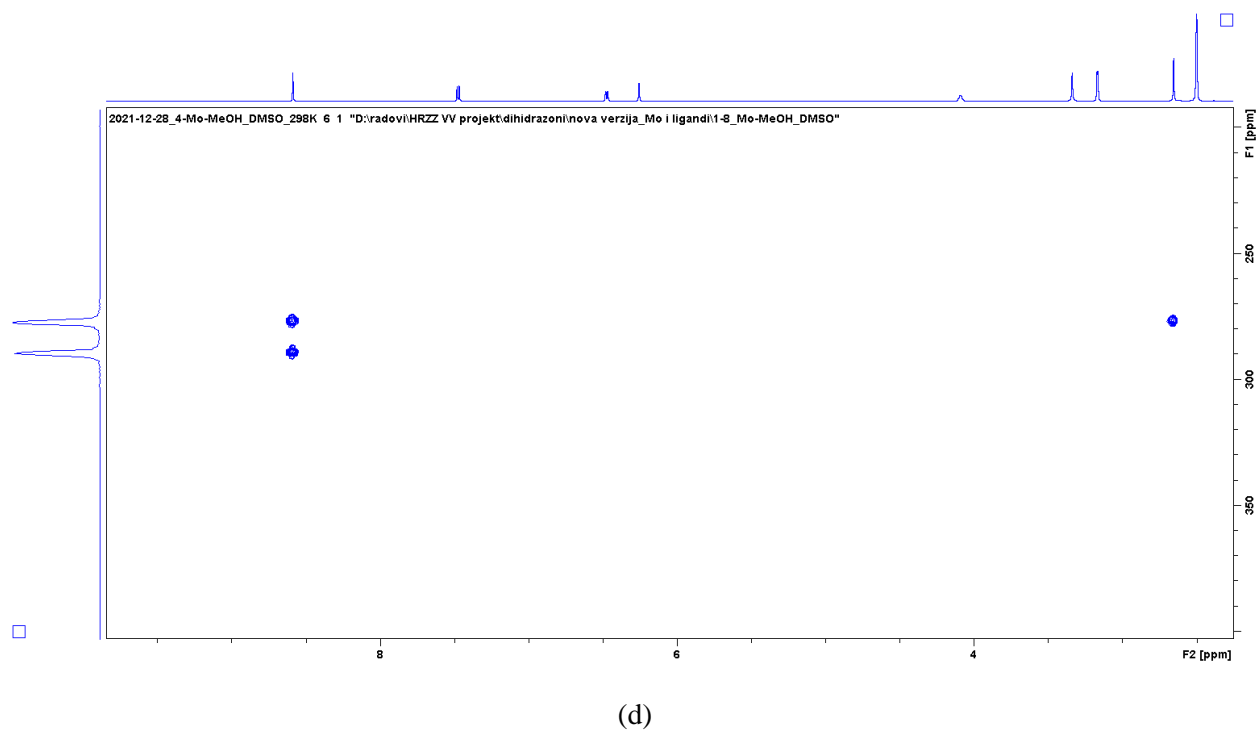

**Figure S29.**  $^1\text{H}$ - $^{15}\text{N}$  HMBC NMR spectra in selected region for succinyl-type of complexes: (a)  $[\text{Mo}_2\text{O}_4(\text{MeOH})_2(\text{L}^1)]$ ; (b)  $[\text{Mo}_2\text{O}_4(\text{MeOH})_2(\text{L}^2)]$ ; (c)  $[\text{Mo}_2\text{O}_4(\text{MeOH})_2(\text{L}^3)]$ ; (d)  $[\text{Mo}_2\text{O}_4(\text{MeOH})_2(\text{L}^4)]$  in  $\text{DMSO}-d_6$  at 298 K.

**Table S8.**  $^1\text{H}$ ,  $^{13}\text{C}$  and  $^{15}\text{N}$  chemical shifts for succinyl-type of complexes ( $[\text{Mo}_2\text{O}_4(\text{MeOH})_2(\text{L}^1\text{-L}^4)]$ ) in  $\text{DMSO}-d_6$  at 298 K, with the atom numbering scheme

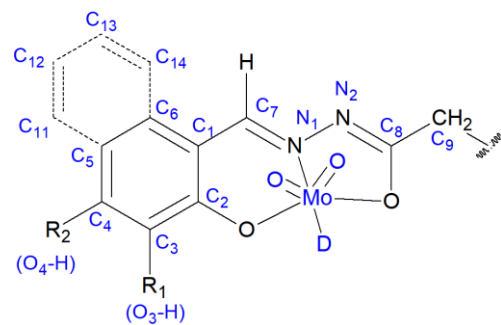

D = MeOH/H<sub>2</sub>O/DMSO

|         | [Mo <sub>2</sub> O <sub>4</sub> (MeOH) <sub>2</sub> (L <sup>1</sup> )] |                         |                         | [Mo <sub>2</sub> O <sub>4</sub> (MeOH) <sub>2</sub> (L <sup>2</sup> )] |                         |                         | [Mo <sub>2</sub> O <sub>4</sub> (MeOH) <sub>2</sub> (L <sup>3</sup> )] |                         |                         | [Mo <sub>2</sub> O <sub>4</sub> (MeOH) <sub>2</sub> (L <sup>4</sup> )] |                         |                         |
|---------|------------------------------------------------------------------------|-------------------------|-------------------------|------------------------------------------------------------------------|-------------------------|-------------------------|------------------------------------------------------------------------|-------------------------|-------------------------|------------------------------------------------------------------------|-------------------------|-------------------------|
| atom(s) | $\delta(^1\text{H})$                                                   | $\delta(^{13}\text{C})$ | $\delta(^{15}\text{N})$ |
| 1       |                                                                        | 120.5                   |                         |                                                                        | 128.1                   |                         |                                                                        | 121.0                   |                         |                                                                        | 112.7                   |                         |
| 2       |                                                                        | 159.8                   |                         |                                                                        | 159.8                   |                         |                                                                        | 148.5                   |                         |                                                                        | 161.7                   |                         |
| 3       | 6.92                                                                   | 119.0                   |                         | 7.17                                                                   | 119.7                   |                         |                                                                        | 146.6                   |                         | 6.26                                                                   | 105.0                   |                         |
| 4       | 7.50                                                                   | 135.3                   |                         | 8.10                                                                   | 135.1                   |                         | 7.03                                                                   | 121.2                   |                         |                                                                        | 164.6                   |                         |
| 5       | 7.05                                                                   | 121.9                   |                         |                                                                        | 110.7                   |                         | 6.86                                                                   | 122.0                   |                         | 6.48                                                                   | 110.5                   |                         |
| 6       | 7.69                                                                   | 134.7                   |                         |                                                                        | 131.8                   |                         | 7.12                                                                   | 124.7                   |                         | 7.48                                                                   | 136.2                   |                         |
| 7       | 8.77                                                                   | 155.9                   |                         | 9.58                                                                   | 150.9                   |                         | 8.70                                                                   | 156.0                   |                         | 8.59                                                                   | 155.6                   |                         |
| 8       |                                                                        | 174.2                   |                         |                                                                        | 172.4                   |                         |                                                                        | 174.1                   |                         |                                                                        | 172.4                   |                         |
| 9       | 2.73                                                                   | 28.0                    |                         |                                                                        | 27.0                    |                         | 2.71                                                                   | 28.2                    |                         | 2.66                                                                   | 27.9                    |                         |
| 11      |                                                                        |                         |                         | 7.94                                                                   | 128.3                   |                         |                                                                        |                         |                         |                                                                        |                         |                         |
| 12      |                                                                        |                         |                         | 7.48                                                                   | 124.1                   |                         |                                                                        |                         |                         |                                                                        |                         |                         |
| 13      |                                                                        |                         |                         | 7.62                                                                   | 127.9                   |                         |                                                                        |                         |                         |                                                                        |                         |                         |
| 14      |                                                                        |                         |                         | 8.45                                                                   | 120.9                   |                         |                                                                        |                         |                         |                                                                        |                         |                         |
| N1      |                                                                        |                         | 300.1                   |                                                                        |                         | 297.3                   |                                                                        |                         | 299.1                   |                                                                        |                         | 289.1                   |
| N2      |                                                                        |                         | 276.3                   |                                                                        |                         | 279.1                   |                                                                        |                         | 276.3                   |                                                                        |                         | 276.3                   |
| O3-H    |                                                                        |                         |                         |                                                                        |                         |                         | 9.37                                                                   |                         |                         |                                                                        |                         |                         |
| O4-H    |                                                                        |                         |                         |                                                                        |                         |                         |                                                                        |                         |                         | 10.51                                                                  |                         |                         |

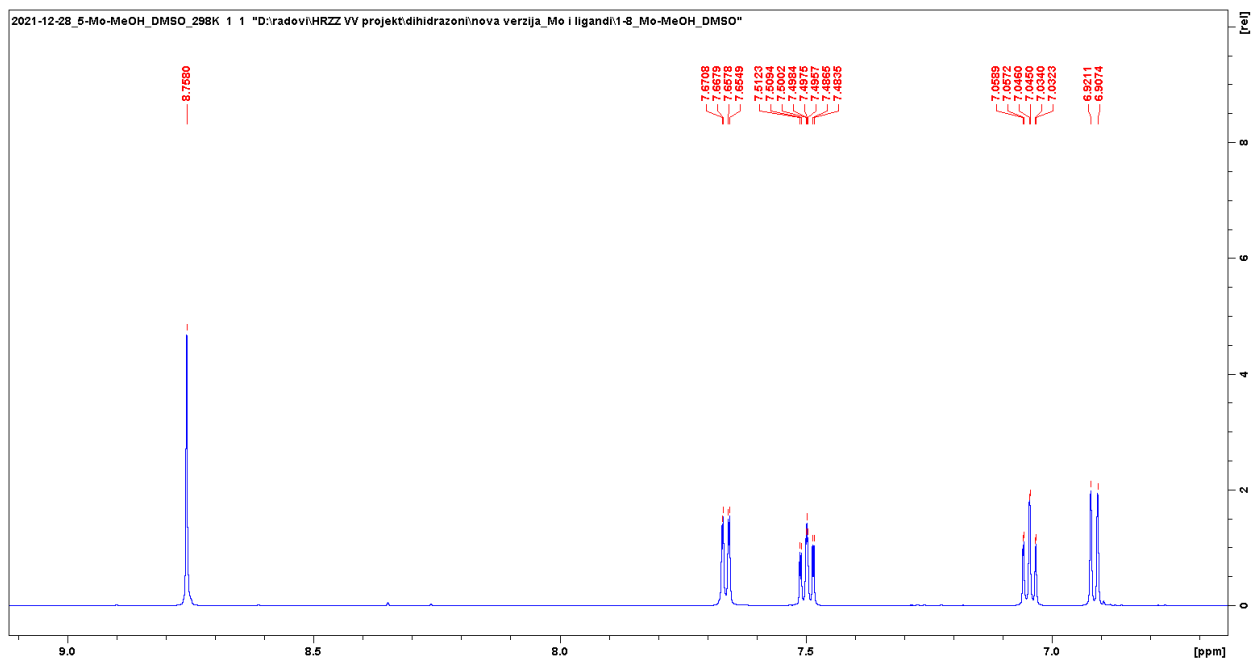

(a)

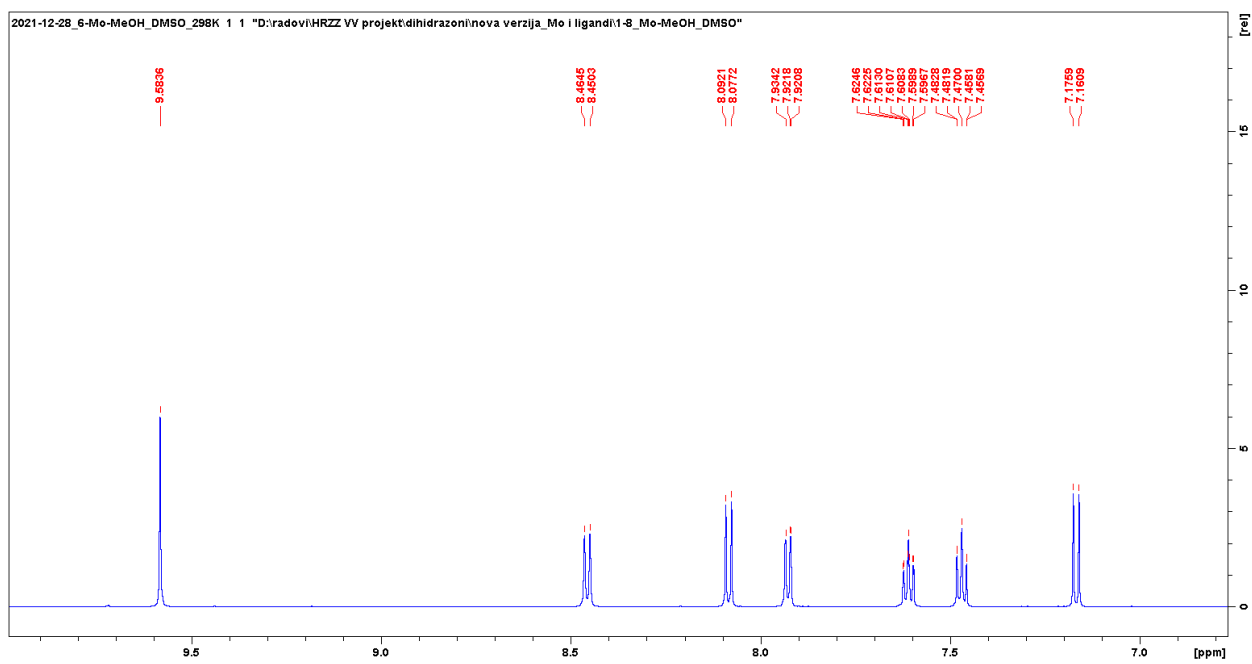

(b)

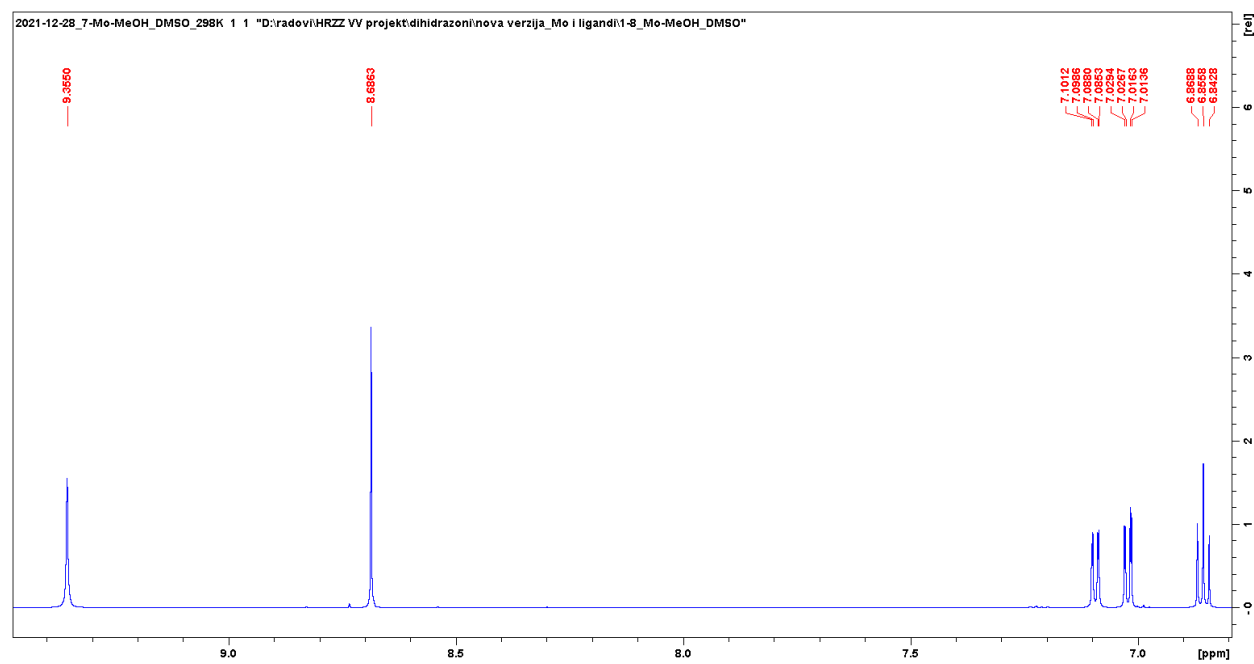

(c)

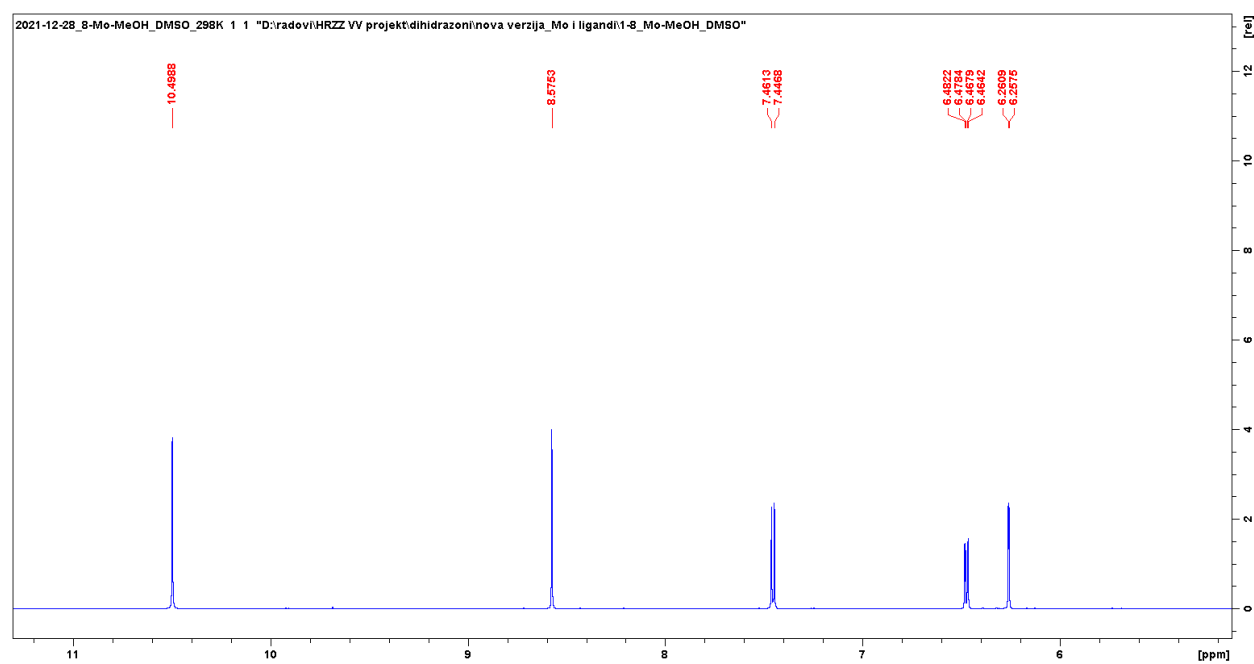

(d)

**Figure S30.**  $^1\text{H}$  NMR spectra in selected region for adipoyl-type of complexes: (a)  $[\text{Mo}_2\text{O}_4(\text{MeOH})_2(\text{L}^5)]$ ; (b)  $[\text{Mo}_2\text{O}_4(\text{MeOH})_2(\text{L}^6)]$ ; (c)  $[\text{Mo}_2\text{O}_4(\text{MeOH})_2(\text{L}^7)]$ ; (d)  $[\text{Mo}_2\text{O}_4(\text{MeOH})_2(\text{L}^8)]$  in  $\text{DMSO}-d_6$  at 298 K.

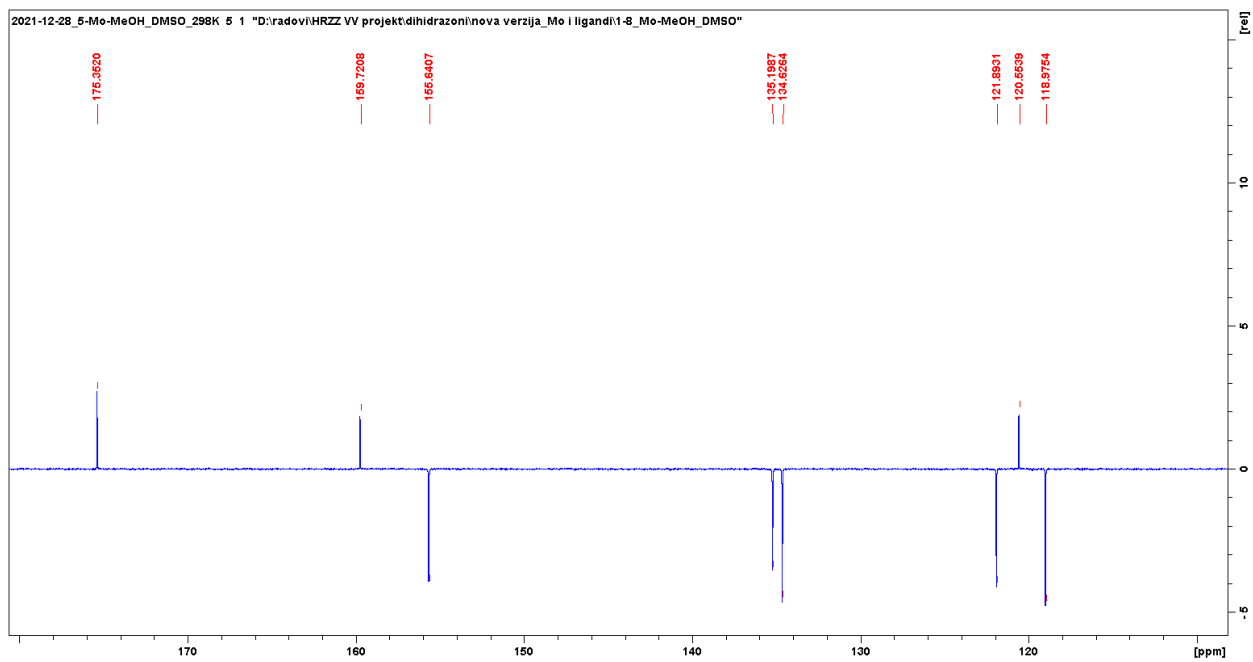

(a)

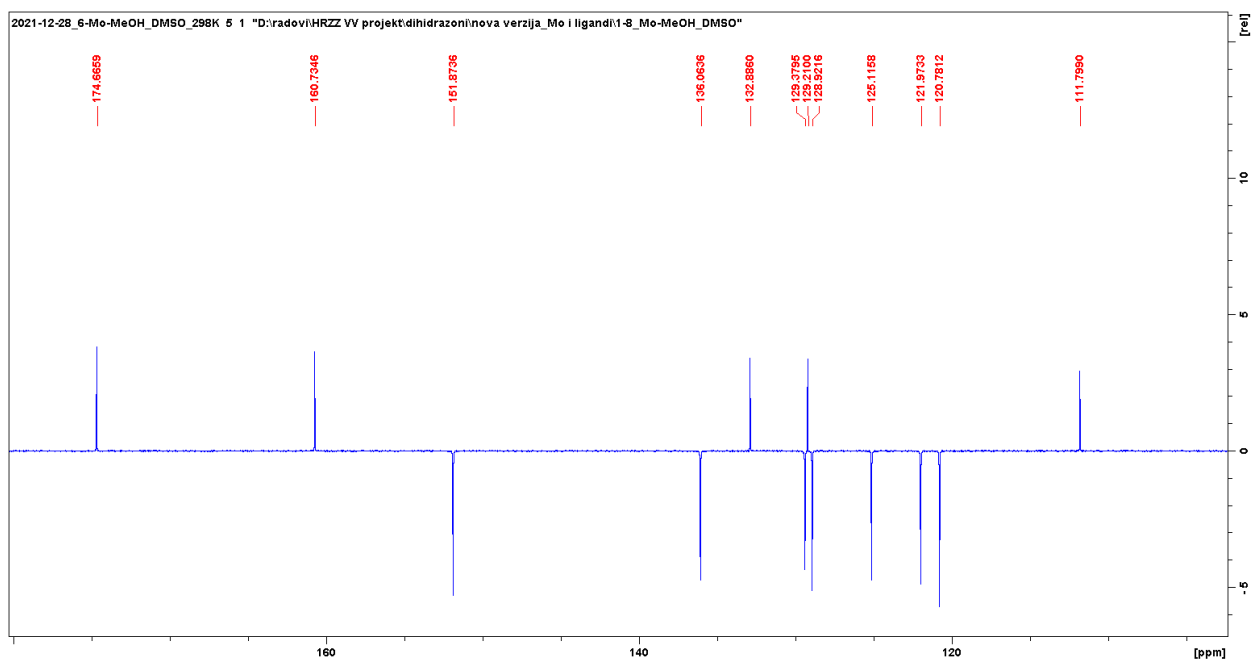

(b)

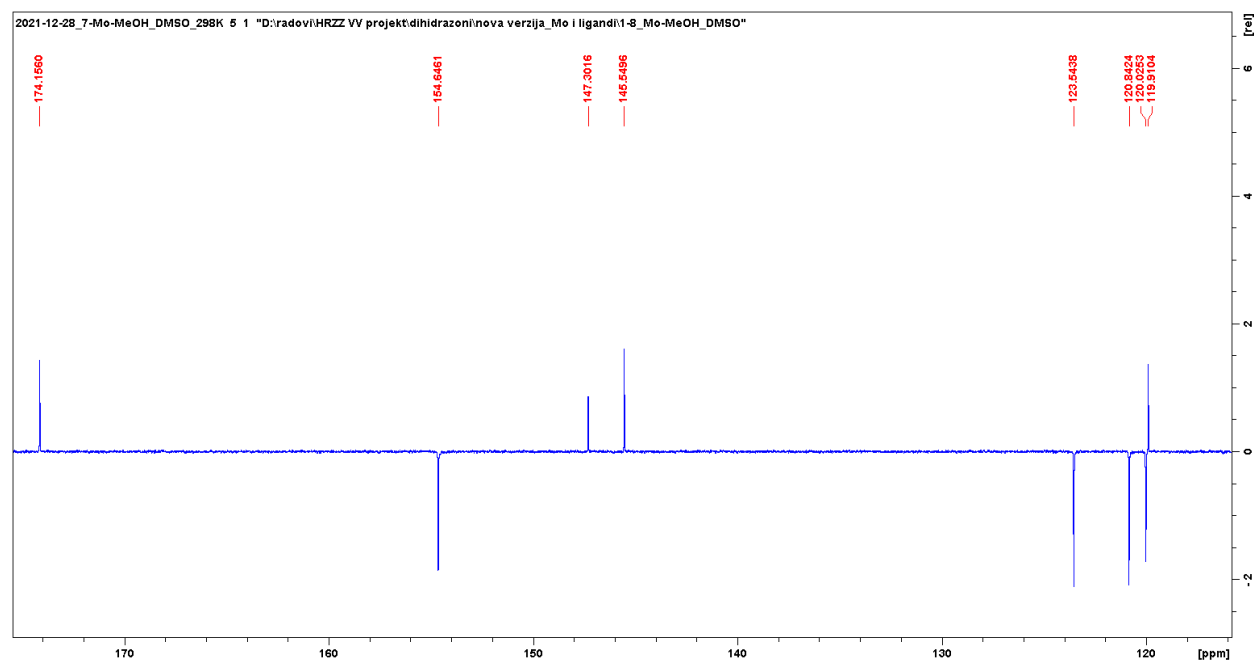

(c)

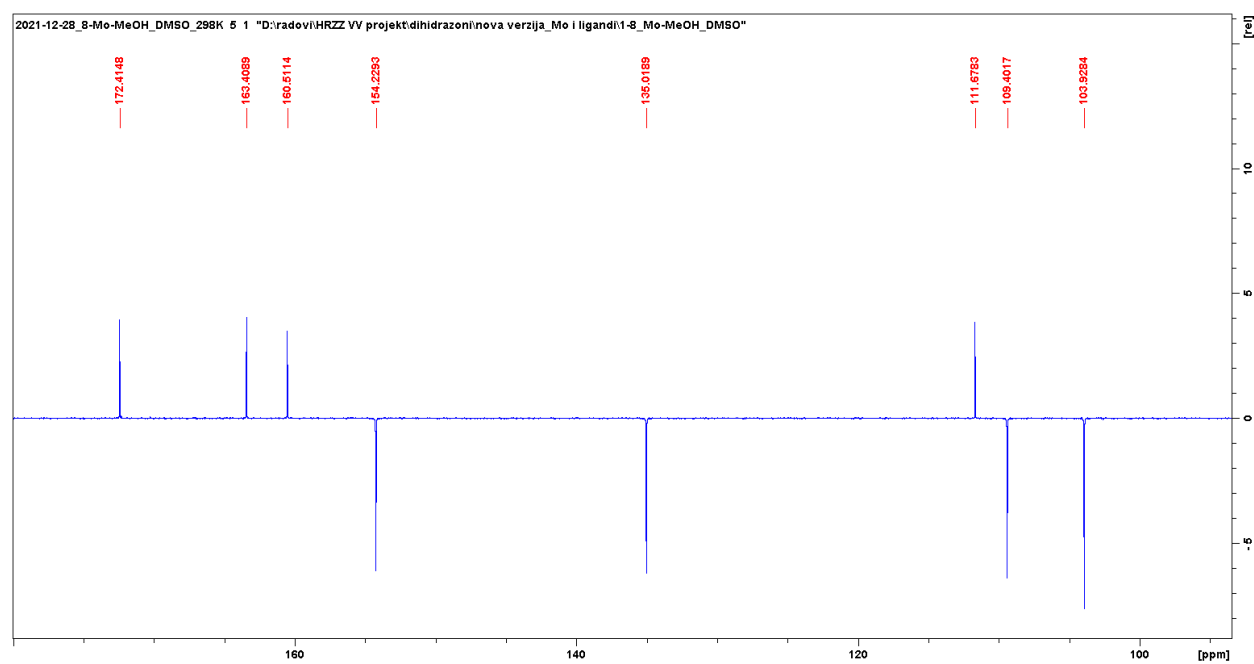

(d)

**Figure S31.**  $^{13}\text{C}$  NMR spectra in selected region for adipoyl-type of complexes: (a)  $[\text{Mo}_2\text{O}_4(\text{MeOH})_2(\text{L}^5)]$ ; (b)  $[\text{Mo}_2\text{O}_4(\text{MeOH})_2(\text{L}^6)]$ ; (c)  $[\text{Mo}_2\text{O}_4(\text{MeOH})_2(\text{L}^7)]$ ; (d)  $[\text{Mo}_2\text{O}_4(\text{MeOH})_2(\text{L}^8)]$  in  $\text{DMSO}-d_6$  at 298 K.



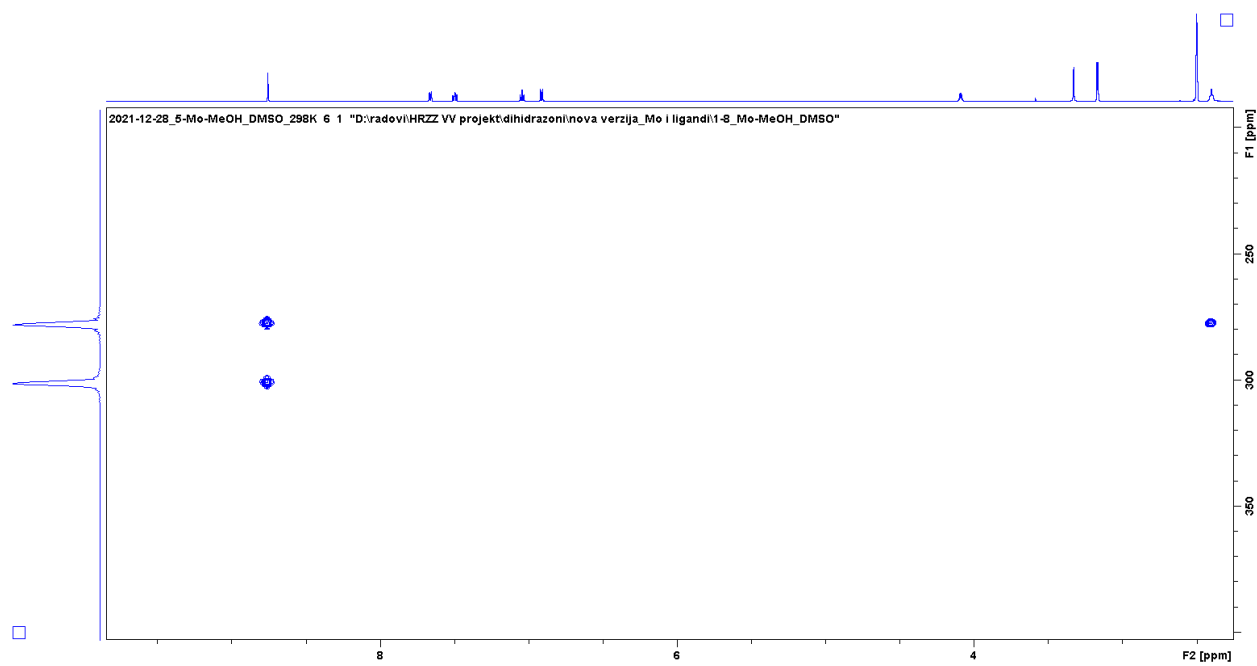

(a)

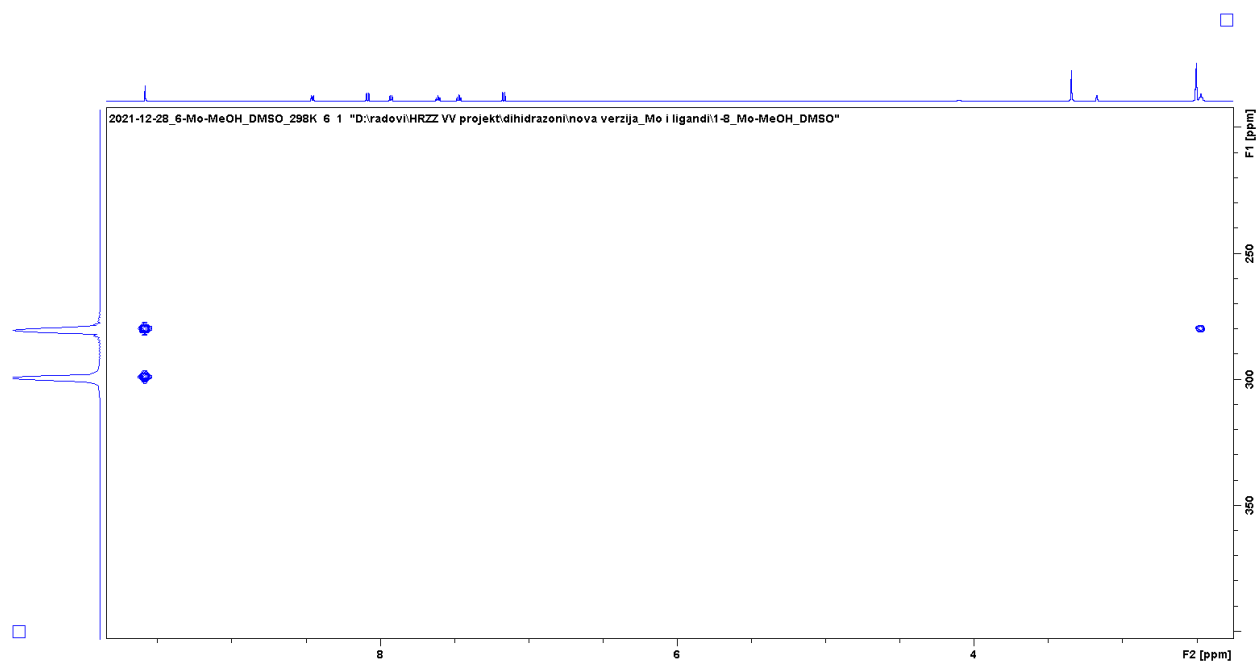

(b)

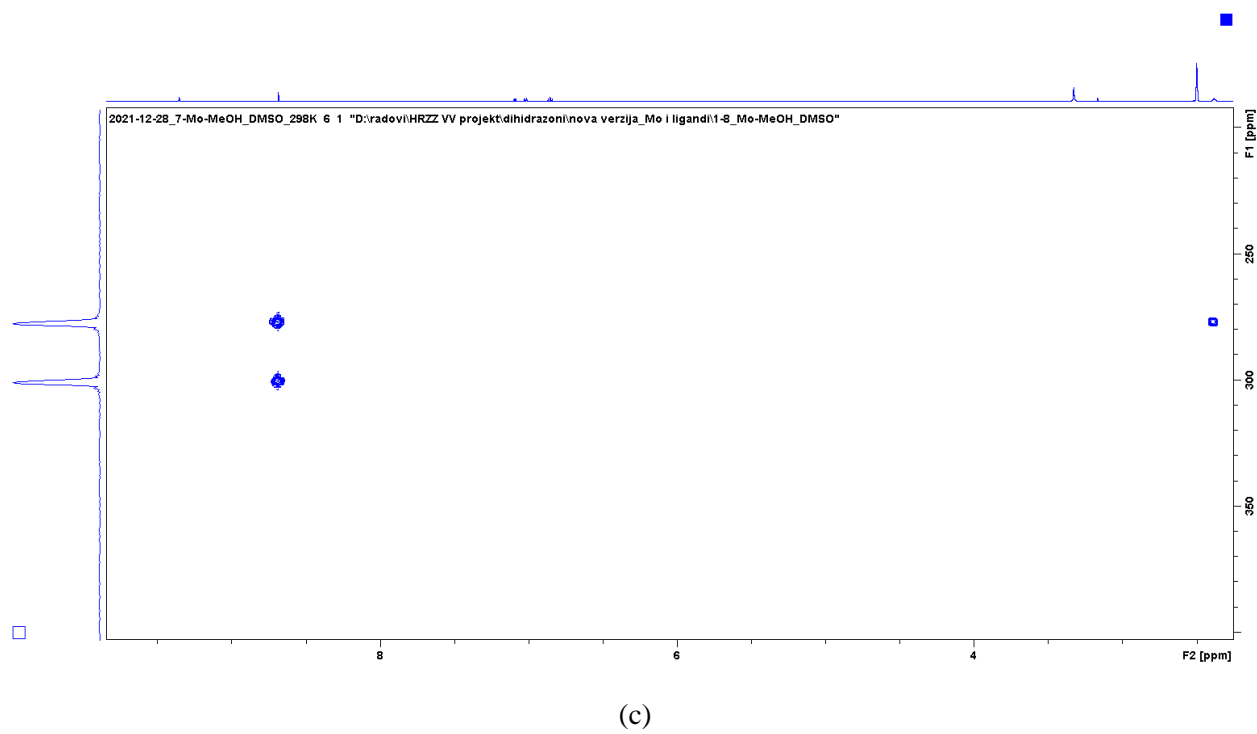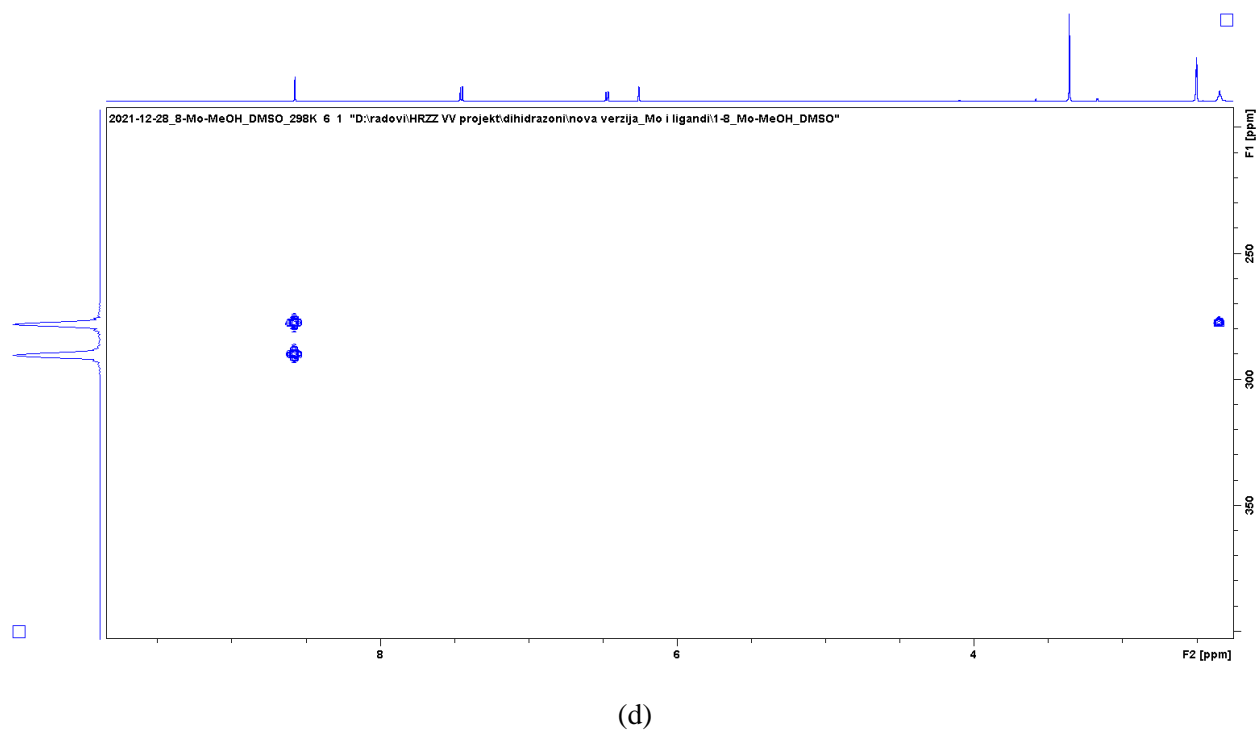

**Figure S32.**  $^1\text{H}$ - $^{15}\text{N}$  HMBC NMR spectra in selected region for adipoyl -type of complexes: (a)  $[\text{Mo}_2\text{O}_4(\text{MeOH})_2(\text{L}^5)]$ ; (b)  $[\text{Mo}_2\text{O}_4(\text{MeOH})_2(\text{L}^6)]$ ; (c)  $[\text{Mo}_2\text{O}_4(\text{MeOH})_2(\text{L}^7)]$ ; (d)  $[\text{Mo}_2\text{O}_4(\text{MeOH})_2(\text{L}^8)]$  in  $\text{DMSO}-d_6$  at 298 K.

**Table S9.**  $^1\text{H}$ ,  $^{13}\text{C}$  and  $^{15}\text{N}$  chemical shifts for adipoyl-type of complexes ( $[\text{Mo}_2\text{O}_4(\text{MeOH})_2(\text{L}^5\text{-L}^8)]$ ) in  $\text{DMSO-}d_6$  at 298 K, with the atom numbering scheme

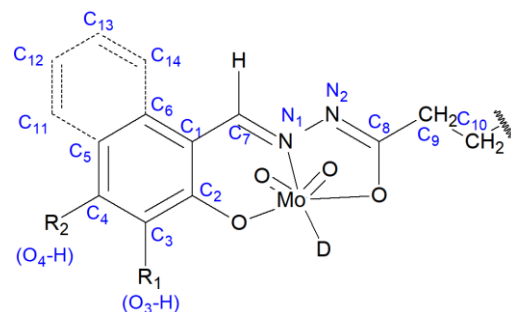

D = MeOH/DMSO

|         | [Mo <sub>2</sub> O <sub>4</sub> (MeOH) <sub>2</sub> (L <sup>5</sup> )] |                         |                         | [Mo <sub>2</sub> O <sub>4</sub> (MeOH) <sub>2</sub> (L <sup>6</sup> )] |                         |                         | [Mo <sub>2</sub> O <sub>4</sub> (MeOH) <sub>2</sub> (L <sup>7</sup> )] |                         |                         | [Mo <sub>2</sub> O <sub>4</sub> (MeOH) <sub>2</sub> (L <sup>8</sup> )] |                         |                         |
|---------|------------------------------------------------------------------------|-------------------------|-------------------------|------------------------------------------------------------------------|-------------------------|-------------------------|------------------------------------------------------------------------|-------------------------|-------------------------|------------------------------------------------------------------------|-------------------------|-------------------------|
| atom(s) | $\delta(^1\text{H})$                                                   | $\delta(^{13}\text{C})$ | $\delta(^{15}\text{N})$ |
| 1       |                                                                        | 120.6                   |                         |                                                                        | 129.2                   |                         |                                                                        | 119.9                   |                         |                                                                        | 111.7                   |                         |
| 2       |                                                                        | 159.7                   |                         |                                                                        | 160.7                   |                         |                                                                        | 147.3                   |                         |                                                                        | 160.5                   |                         |
| 3       | 6.91                                                                   | 119.0                   |                         | 7.17                                                                   | 120.8                   |                         |                                                                        | 145.5                   |                         | 6.26                                                                   | 103.9                   |                         |
| 4       | 7.50                                                                   | 135.2                   |                         | 8.09                                                                   | 136.1                   |                         | 7.02                                                                   | 120.0                   |                         |                                                                        | 163.4                   |                         |
| 5       | 7.05                                                                   | 121.9                   |                         |                                                                        | 111.8                   |                         | 6.86                                                                   | 120.8                   |                         | 6.48                                                                   | 109.4                   |                         |
| 6       | 7.66                                                                   | 134.6                   |                         |                                                                        | 132.9                   |                         | 7.09                                                                   | 123.5                   |                         | 7.46                                                                   | 135.0                   |                         |
| 7       | 8.76                                                                   | 155.6                   |                         | 9.58                                                                   | 151.9                   |                         | 8.68                                                                   | 154.6                   |                         | 8.58                                                                   | 154.2                   |                         |
| 8       |                                                                        | 175.4                   |                         |                                                                        | 174.7                   |                         |                                                                        | 174.2                   |                         |                                                                        | 172.4                   |                         |
| 9       | 2.40                                                                   | 31.1                    |                         |                                                                        | 31.1                    |                         | 2.39                                                                   | 30.1                    |                         | 2.35                                                                   | 29.9                    |                         |
| 10      | 1.66                                                                   | 25.8                    |                         |                                                                        | 25.9                    |                         | 1.65                                                                   | 24.7                    |                         | 1.63                                                                   | 24.8                    |                         |
| 11      |                                                                        |                         |                         | 7.93                                                                   | 129.4                   |                         |                                                                        |                         |                         |                                                                        |                         |                         |
| 12      |                                                                        |                         |                         | 7.47                                                                   | 125.1                   |                         |                                                                        |                         |                         |                                                                        |                         |                         |
| 13      |                                                                        |                         |                         | 7.61                                                                   | 128.9                   |                         |                                                                        |                         |                         |                                                                        |                         |                         |
| 14      |                                                                        |                         |                         | 8.46                                                                   | 122.0                   |                         |                                                                        |                         |                         |                                                                        |                         |                         |
| N1      |                                                                        |                         | 301.0                   |                                                                        |                         | 299.1                   |                                                                        |                         | 300.1                   |                                                                        |                         | 289.1                   |
| N2      |                                                                        |                         | 277.3                   |                                                                        |                         | 280.1                   |                                                                        |                         | 276.3                   |                                                                        |                         | 277.3                   |
| O3-H    |                                                                        |                         |                         |                                                                        |                         |                         | 9.36                                                                   |                         |                         |                                                                        |                         |                         |
| O4-H    |                                                                        |                         |                         |                                                                        |                         |                         |                                                                        |                         |                         | 10.50                                                                  |                         |                         |



## ATR FT-IR spectroscopy

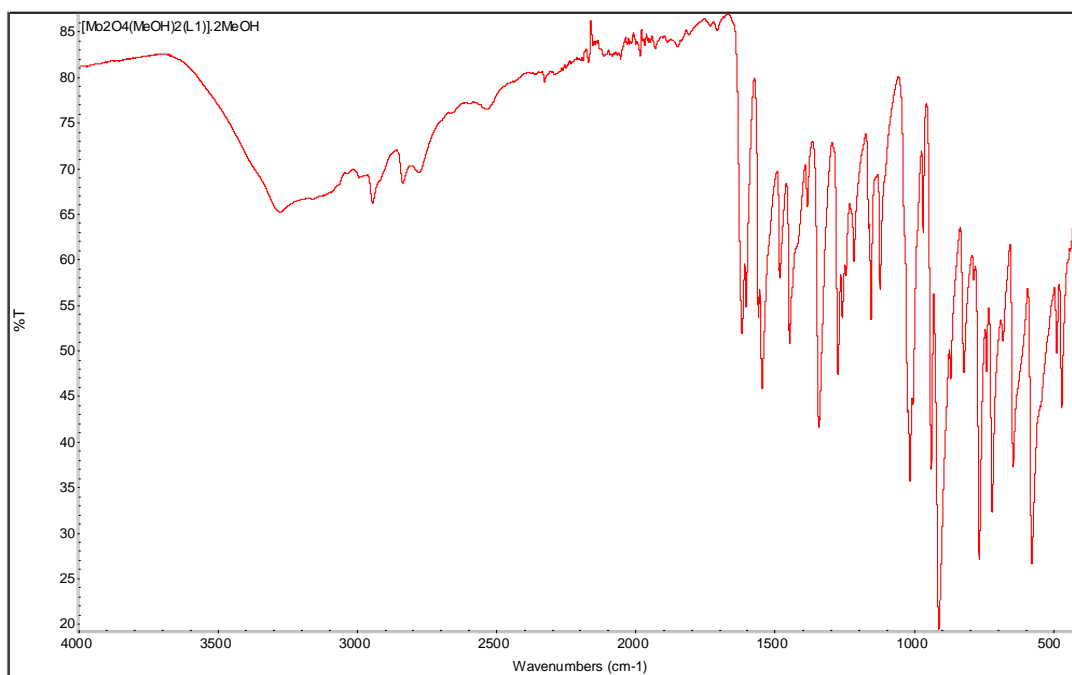

**Figure S33.** ATR FT-IR spectra of  $[\text{Mo}_2\text{O}_4(\text{MeOH})_2(\text{L}^1)] \cdot 2\text{MeOH}$ .

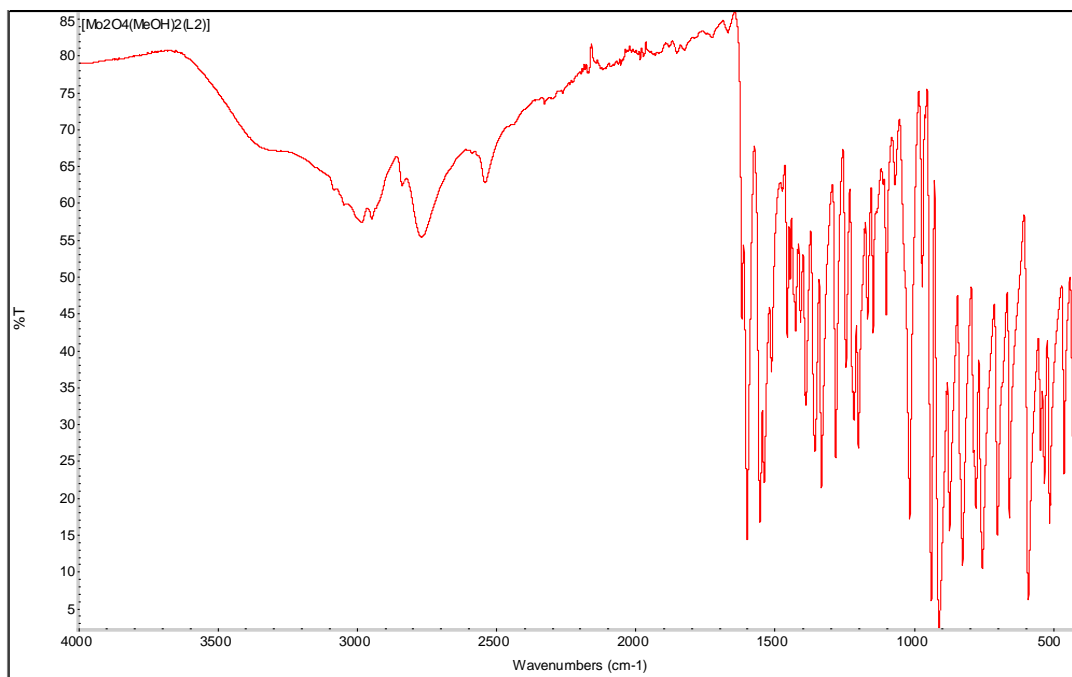

**Figure S34.** ATR FT-IR spectra of  $[\text{Mo}_2\text{O}_4(\text{MeOH})_2(\text{L}^2)]$ .

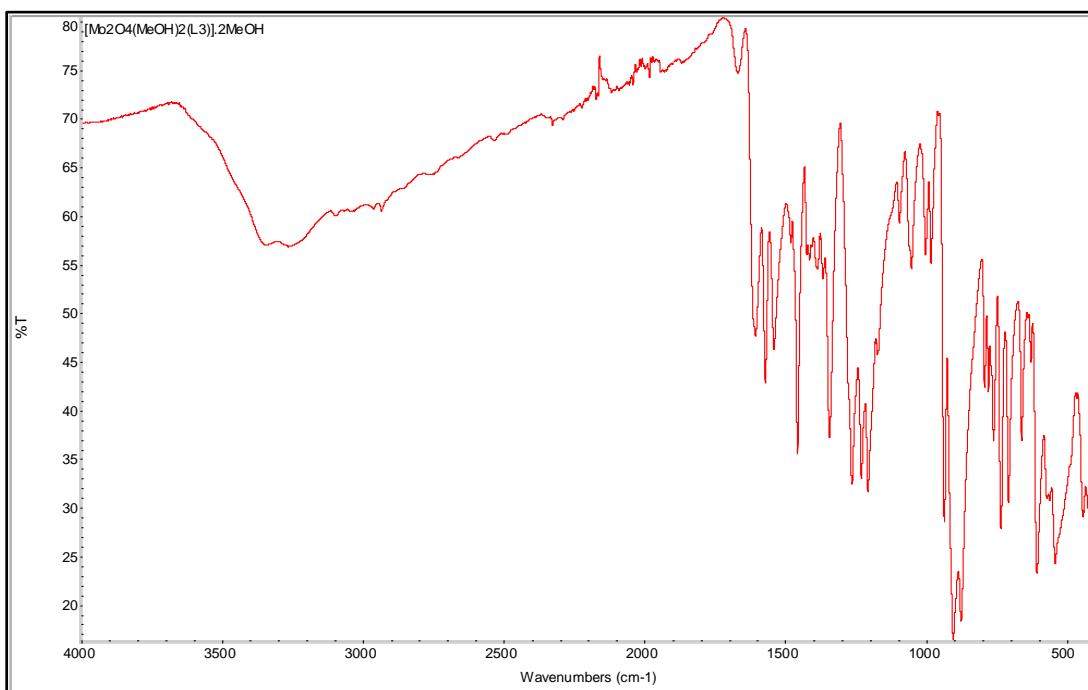

**Figure S35.** ATR FT-IR spectra of  $[\text{Mo}_2\text{O}_4(\text{MeOH})_2(\text{L}^3)] \cdot 2\text{MeOH}$ .

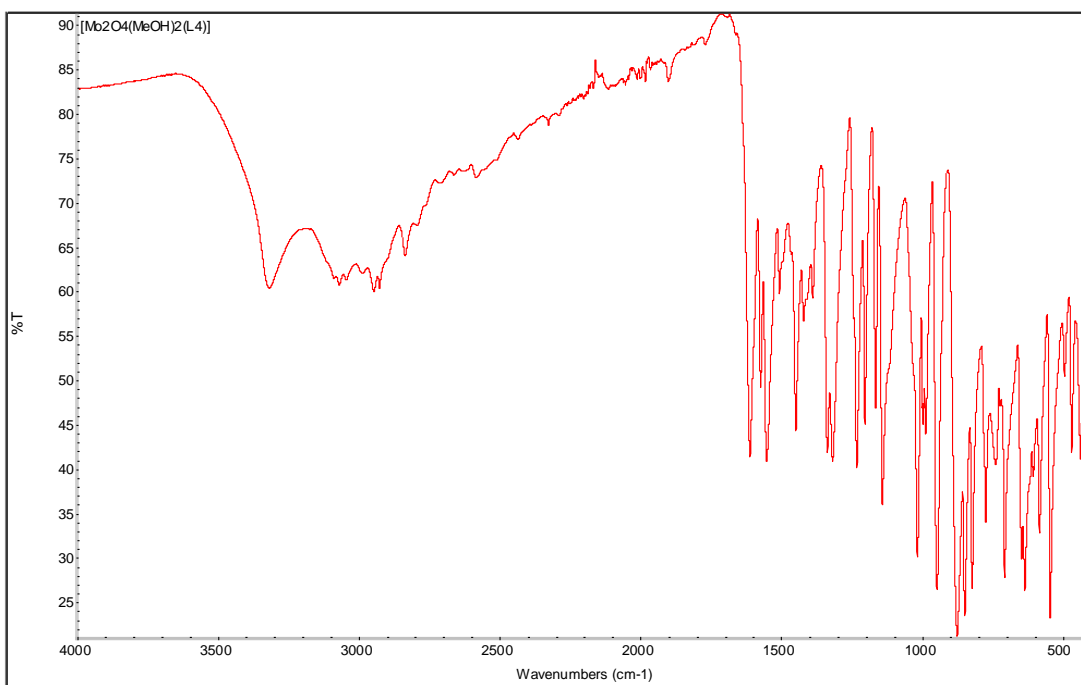

**Figure S36.** ATR FT-IR spectra of  $[\text{Mo}_2\text{O}_4(\text{MeOH})_2(\text{L}^4)]$ .

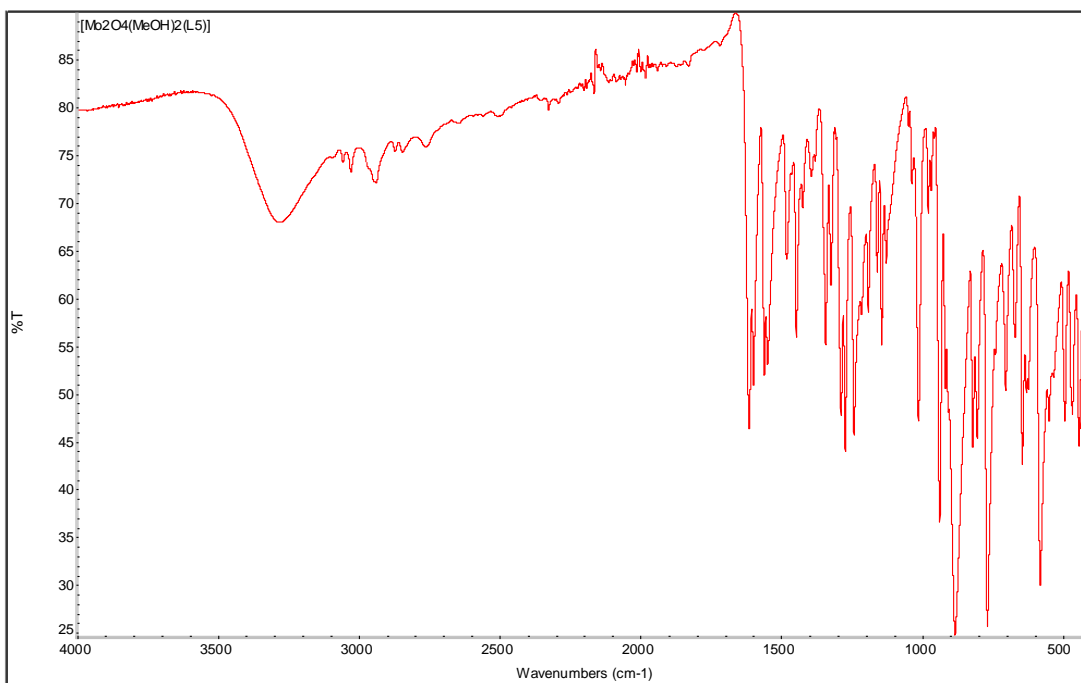

**Figure S37.** ATR FT-IR spectra of  $[\text{Mo}_2\text{O}_4(\text{MeOH})_2(\text{L}^5)]$ .

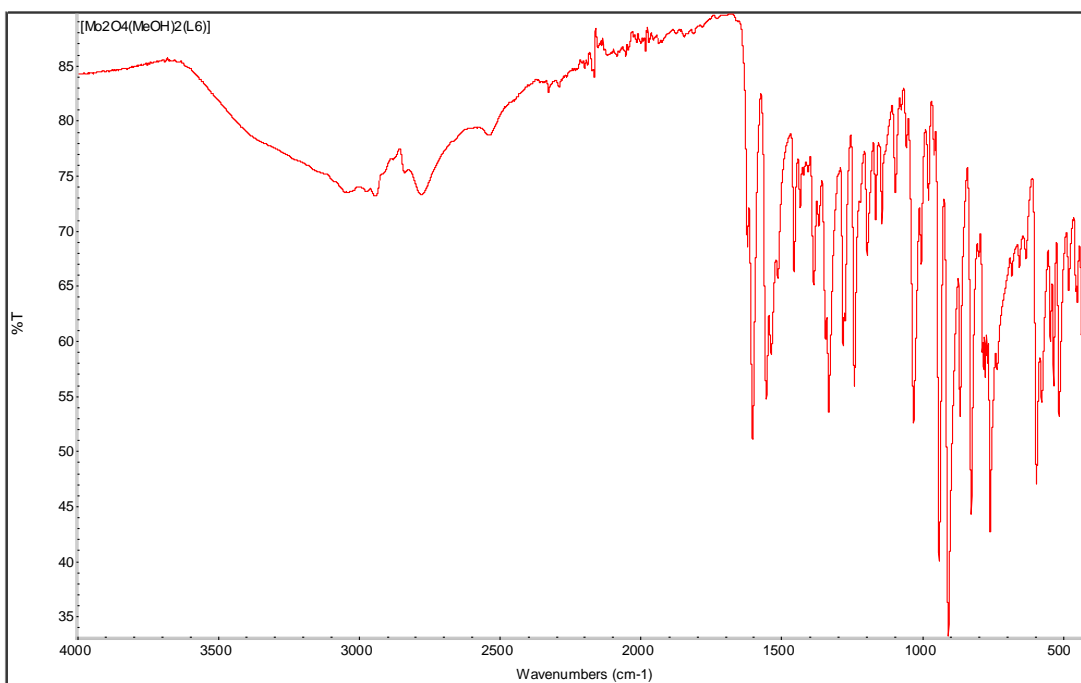

**Figure S38.** ATR FT-IR spectra of  $[\text{Mo}_2\text{O}_4(\text{MeOH})_2(\text{L}^6)]$ .

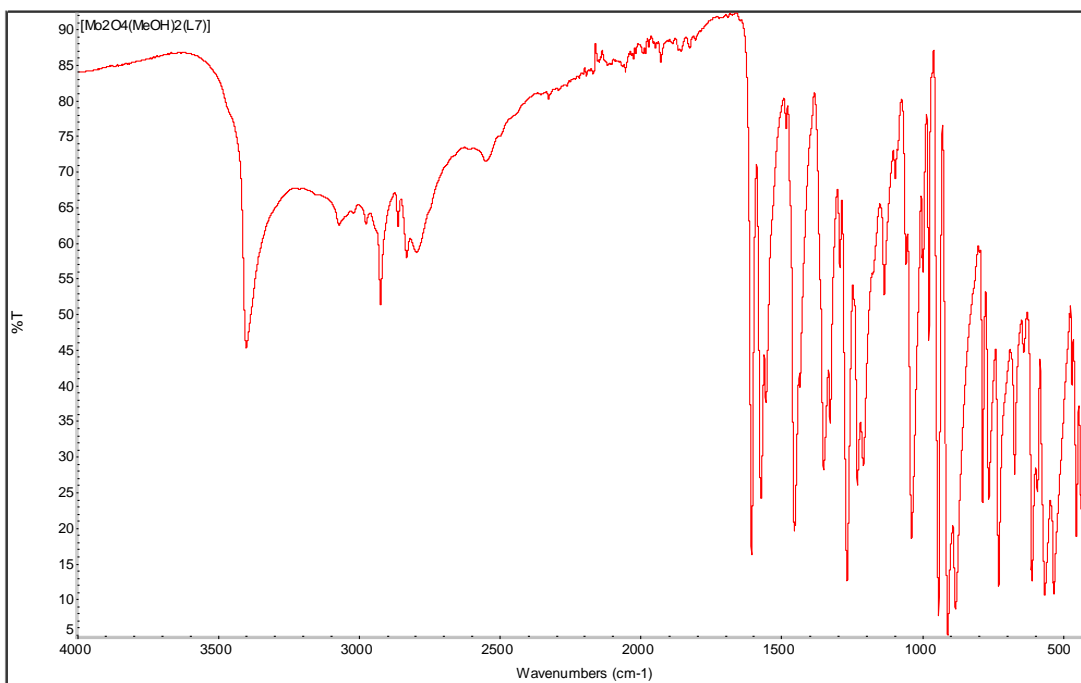

**Figure S39.** ATR FT-IR spectra of  $[\text{Mo}_2\text{O}_4(\text{MeOH})_2(\text{L}^7)]$ .

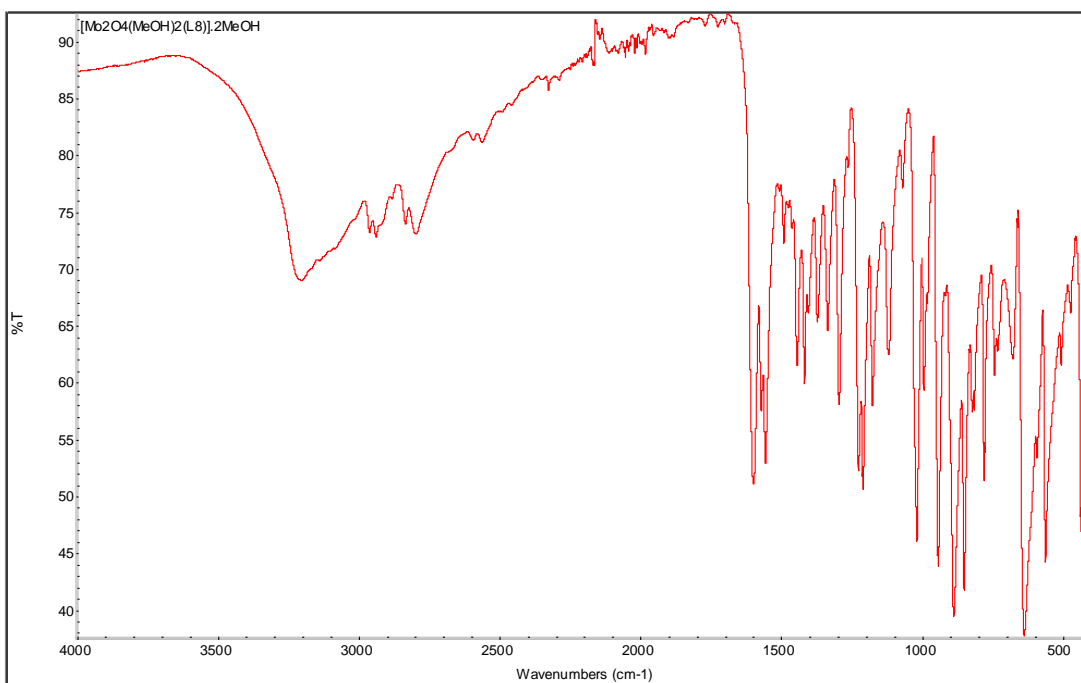

**Figure S40.** ATR FT-IR spectra of  $[\text{Mo}_2\text{O}_4(\text{MeOH})_2(\text{L}^8)] \cdot 2\text{MeOH}$ .
